# Supplementary material for: Knowledge and Risk Perceptions of Chronic Kidney Disease Risk Factors among Women of Childbearing Age in Lagos State, Nigeria: From a Health Demography Approach
Source: Int J Nephrol. 2022 May 19;2022:5511555. doi: 10.1155/2022/5511555 (PMC9135572; doi:10.1155/2022/5511555)
Supplement: Supplementary Materials — Corrected cleaned PhD data are provided. [file 5511555.f1.xls]

## Sheet: Corrected cleaned PhD data
IDNumber	var1	var2	var3	var4	var5	var6	var7a	var7b	var8a	var8b	var8c	var9	var10	var11	var12	var13a1	var13a2	var13a3	var13b	var14a	var14b	var15a	var15b	var15c	var16and1	var16and2	var16and3	var16and4	var16and5	var16and6	var16and7	var16and8	var16and9	var16and10	var16and11	var16and12	var16and13	var16and14	var16and15	var16and16	var16and17	var16and18	var17	var18	var19	var20and1	var20and2	var20and3	var20and4
0007	1	2	7	1	1	2	6	Professional rank	4	2	98	4	5	4	5	2	2	2	98	1	3	1	7	2	1	1	1	1	1	1	1	1	1	1	1	1	1	1	1	1	1	1	1	2	2	2	1	1	2
0008	1	3	8	1	1	2	1	Professional rank	3	2	98	3	3	3	3	2	2	2	98	1	4	1	6	1	1	1	1	1	1	1	1	1	1	1	1	1	1	1	1	1	1	1	1	1	1	2	2	1	1
0010	1	2	6	4	1	1	5	Professional rank	1	2	98	4	4	4	5	2	2	2	98	1	3	1	7	2	1	.	1	1	1	1	1	1	1	1	.	.	.	.	.	.	.	.	1	2	1	1	1	1	1
0013	1	3	8	1	1	2	5	Administrative Rank	4	2	98	3	5	4	4	1	2	2	1	1	6	1	10	4	1	1	1	1	1	1	1	1	1	1	1	1	1	1	1	1	1	1	1	2	1	2	1	1	1
0014	2	2	6	2	1	2	5	Administrative Rank	2	2	98	4	3	3	3	2	2	2	98	1	4	1	7	1	1	1	1	1	1	1	1	1	1	1	1	1	1	1	1	1	1	1	1	2	2	2	2	1	1
0015	1	4	8	1	2	1	1	Trader/Artisans/Business	7	2	98	3	5	5	4	1	1	1	2	1	3	1	6	3	1	1	1	1	1	1	1	1	1	1	1	1	1	1	1	1	1	1	1	1	1	2	1	1	1
0018	1	5	9	1	2	1	2	Trader/Artisans/Business	7	2	98	3	3	3	4	1	1	1	2	1	1	1	10	4	1	1	1	1	1	1	1	1	1	1	1	1	1	1	1	1	1	1	2	1	1	1	1	1	1
0019	1	5	8	2	5	1	1	Trader/Artisans/Business	7	1	1	3	3	3	3	2	2	2	98	1	4	1	7	3	1	1	1	1	1	1	1	1	1	1	1	1	1	1	1	1	1	1	1	1	1	2	2	1	2
0020	1	2	8	3	1	1	5	Professional rank	3	1	2	3	3	3	2	1	2	2	1	1	4	1	6	3	1	1	1	1	1	1	1	1	1	1	1	1	1	1	1	1	1	1	5	1	1	2	1	1	1
0024	2	5	9	1	3	1	1	Administrative Rank	6	2	98	3	5	4	5	2	2	2	98	1	4	1	7	3	1	1	1	1	1	1	1	1	1	1	1	1	1	1	1	1	1	1	4	3	2	2	2	1	1
0025	2	3	8	1	1	2	5	Trader/Artisans/Business	4	2	98	3	5	4	4	1	2	2	2	1	6	1	10	4	1	1	1	1	1	1	1	1	1	1	1	1	1	1	1	1	1	1	1	2	1	2	1	1	1
0026	1	3	8	1	1	2	1	Trader/Artisans/Business	4	1	1	4	5	5	4	2	2	2	98	1	1	1	1	1	1	1	1	1	1	1	1	1	1	1	1	1	1	1	1	1	1	1	1	3	2	2	1	1	1
0027	2	2	6	1	1	1	5	Teaching/Academic Rank	3	1	2	2	3	3	2	1	2	2	2	1	4	1	1	3	1	1	1	1	1	1	1	1	1	1	1	1	1	1	1	1	1	1	4	2	1	2	1	1	1
0028	1	3	8	1	1	1	2	Trader/Artisans/Business	6	1	3	3	4	4	5	1	1	1	3	1	4	1	2	1	1	.	1	1	1	1	1	1	1	1	1	1	1	1	1	1	1	1	4	2	2	2	1	1	1
0030	2	3	8	2	1	1	1	Others	7	1	1	3	5	3	4	2	2	2	98	1	4	1	2	1	1	1	1	1	1	1	1	1	1	1	1	1	1	1	1	1	1	1	4	2	2	2	2	2	2
0031	1	1	8	1	1	1	1	Teaching/Academic Rank	4	1	2	4	5	5	4	2	2	2	98	1	4	1	1	1	1	1	1	1	1	1	1	1	1	1	1	1	1	1	1	1	1	1	1	1	1	2	2	2	2
0033	2	1	5	1	1	2	5	Teaching/Academic Rank	1	2	98	3	4	5	4	1	2	2	2	1	6	1	3	2	1	1	1	1	1	1	1	1	1	1	1	1	1	1	1	1	1	1	4	1	2	2	1	2	2
0034	1	1	3	4	1	1	5	Trader/Artisans/Business	1	2	98	3	3	3	3	2	2	2	98	1	1	1	10	4	1	1	1	1	1	1	1	1	1	1	1	1	1	1	1	1	1	1	5	1	1	2	2	2	2
0035	2	2	8	1	1	2	5	Teaching/Academic Rank	7	2	98	4	3	3	5	1	2	2	2	1	2	1	7	2	1	1	1	1	1	1	1	1	1	1	1	1	1	1	1	1	1	1	4	2	2	2	1	2	2
0037	2	2	6	1	1	1	5	Teaching/Academic Rank	2	1	4	4	3	3	2	1	2	1	3	1	4	1	2	3	1	1	1	1	1	1	1	1	1	1	1	1	1	1	1	1	1	1	4	2	1	2	2	2	2
0039	2	1	6	1	1	1	1	Teaching/Academic Rank	4	2	98	3	5	4	3	2	2	2	98	1	1	1	1	1	.	1	1	1	1	1	1	1	1	1	1	1	1	1	1	1	1	1	1	3	2	2	1	2	2
0040	1	2	7	1	1	1	1	Trader/Artisans/Business	4	1	98	3	4	4	3	2	2	2	98	1	1	1	7	2	1	1	1	1	1	1	1	1	1	1	1	1	1	1	1	1	1	1	1	3	2	3	3	3	3
0041	2	2	8	1	2	2	1	Professional rank	7	1	6	2	3	3	4	2	1	1	98	1	3	1	10	4	1	1	1	1	1	1	1	1	1	1	1	1	1	1	1	1	1	1	1	3	2	2	1	2	2
0047	2	2	8	2	1	1	1	Trader/Artisans/Business	7	2	98	3	4	4	4	1	2	2	3	1	2	1	7	2	1	1	1	1	1	1	1	1	1	1	1	1	1	1	1	1	1	1	1	2	2	1	1	1	1
0050	1	3	7	1	1	2	5	Professional rank	2	1	98	3	4	4	5	2	2	2	98	1	1	1	4	3	1	1	1	1	1	1	1	1	1	1	1	1	1	1	1	1	1	1	1	1	1	2	2	2	2
0051	2	3	7	3	2	2	4	Professional rank	5	1	3	3	4	3	3	2	2	2	98	1	2	1	10	4	1	1	1	1	1	1	1	1	1	1	1	1	1	1	1	1	1	1	4	2	2	2	2	2	2
0052	2	5	8	1	2	1	2	Professional rank	7	2	98	3	3	3	4	2	2	2	98	1	4	1	4	3	.	1	1	1	1	1	1	1	1	1	1	1	1	1	1	1	1	1	1	1	1	2	2	2	2
0054	2	3	9	1	2	2	1	Trader/Artisans/Business	7	1	5	2	2	3	1	1	1	1	1	1	4	1	4	2	1	1	1	1	1	1	1	1	1	1	1	1	1	1	1	1	1	1	4	1	1	2	2	2	2
0058	1	1	5	3	1	2	5	Trader/Artisans/Business	1	2	98	2	3	4	4	2	2	2	98	1	4	1	4	3	1	1	1	1	1	1	1	1	1	1	1	1	1	1	1	1	1	1	4	1	1	2	2	2	1
0060	1	5	8	4	2	1	1	Administrative Rank	7	1	2	2	3	4	3	1	1	1	3	1	4	1	4	3	1	1	1	1	1	1	1	1	1	1	1	1	1	1	1	1	1	1	1	2	2	2	2	2	1
0061	2	4	8	2	2	1	1	Administrative Rank	6	2	98	3	5	5	4	1	1	1	1	1	3	1	4	3	1	1	1	1	1	1	1	1	1	1	1	1	1	1	1	1	1	1	4	1	1	2	2	2	1
0062	1	4	8	2	2	1	4	Administrative Rank	7	2	98	2	3	3	4	1	2	2	3	1	6	1	10	4	.	1	1	1	1	1	1	1	1	1	1	1	1	1	1	1	1	1	1	2	2	2	2	2	1
0068	1	1	7	1	1	1	2	Administrative Rank	4	2	98	3	4	4	1	2	2	2	98	1	4	1	7	2	1	1	1	1	1	1	1	1	1	1	1	1	1	1	1	1	1	1	1	1	2	1	1	1	1
0069	2	3	8	2	1	1	1	Trader/Artisans/Business	3	2	98	3	5	5	5	2	2	2	98	1	4	1	3	3	1	1	1	1	1	1	1	1	1	1	1	1	1	1	1	1	1	1	1	1	1	2	2	2	1
0071	1	2	6	2	1	1	5	Teaching/Academic Rank	4	2	98	4	5	3	5	2	2	2	98	1	1	1	3	3	1	1	1	1	1	1	1	1	1	1	1	1	1	1	1	1	1	1	3	2	2	2	2	2	2
0072	1	3	8	1	1	1	4	Trader/Artisans/Business	7	2	98	3	4	4	5	2	2	2	98	1	4	1	1	1	1	1	1	1	1	1	1	1	1	1	1	1	1	1	1	1	1	1	2	2	2	2	2	2	1
0073	2	2	1	1	1	1	5	Trader/Artisans/Business	4	2	98	4	5	4	5	1	1	1	2	1	1	1	10	4	1	1	1	1	1	1	1	1	1	1	1	1	1	1	1	1	1	1	1	1	2	2	1	2	1
0074	1	2	8	4	1	1	5	Trader/Artisans/Business	3	2	98	3	3	3	5	1	2	2	2	1	4	1	3	1	1	1	1	1	1	1	1	1	1	1	1	1	1	1	1	1	1	1	5	1	1	2	2	2	1
0075	2	1	5	4	1	1	5	Teaching/Academic Rank	1	1	3	3	4	4	3	2	2	2	98	2	6	1	10	4	1	.	1	1	1	1	1	1	1	1	1	1	1	1	1	1	1	1	5	1	2	2	1	2	2
0076	1	3	8	1	1	1	1	Trader/Artisans/Business	5	1	98	3	4	3	3	2	2	2	98	1	4	1	3	3	1	.	1	1	1	1	1	1	1	1	1	1	1	1	1	1	1	1	4	1	2	2	1	2	1
0077	1	1	5	3	1	1	5	Teaching/Academic Rank	1	2	98	4	5	5	4	2	2	2	98	1	4	1	3	1	1	.	1	1	1	1	1	1	1	1	1	1	1	1	1	1	1	1	4	1	2	2	2	2	1
0078	2	1	6	4	1	1	5	Trader/Artisans/Business	1	1	3	3	4	5	3	2	2	2	98	1	4	1	7	2	1	1	.	.	.	.	.	.	0	.	.	.	.	.	.	.	.	.	4	1	1	2	1	2	1
0079	1	1	8	4	1	1	2	Professional rank	4	1	98	4	4	4	4	2	2	2	98	1	1	1	3	1	1	1	1	1	1	1	1	1	1	1	1	1	1	1	1	1	1	1	1	1	2	2	1	2	1
0081	1	4	8	1	2	1	2	Administrative Rank	7	2	98	3	5	4	5	1	1	1	2	1	4	1	6	3	1	1	1	1	1	1	1	1	1	1	1	1	1	1	1	1	1	1	4	2	1	2	2	2	1
0082	1	3	8	1	1	1	4	Administrative Rank	5	2	98	4	5	5	5	2	2	1	98	1	6	1	5	1	1	1	1	1	1	1	1	1	1	1	1	1	1	1	1	1	1	1	1	1	1	2	2	2	1
0084	1	4	6	4	2	1	1	Trader/Artisans/Business	7	1	5	3	4	4	4	1	1	1	3	1	4	1	5	3	1	.	1	1	1	1	1	1	1	1	1	1	1	1	1	1	1	1	4	3	2	2	2	2	2
0086	1	2	10	1	1	1	5	Teaching/Academic Rank	1	2	98	4	5	5	5	1	1	1	2	1	1	1	10	4	1	1	1	1	1	1	1	1	1	1	1	1	1	1	1	1	1	1	1	1	2	2	1	2	1
0087	2	2	10	1	1	1	5	Trader/Artisans/Business	1	2	98	4	5	4	5	1	1	1	2	1	1	1	10	4	1	.	1	1	1	1	1	1	1	1	1	1	1	1	1	1	1	1	1	1	2	2	2	2	1
0089	2	4	8	1	2	1	1	Trader/Artisans/Business	2	2	98	4	3	3	5	2	2	2	98	1	3	1	2	1	1	1	1	1	1	1	1	1	1	1	1	1	1	1	1	1	1	1	1	2	2	2	2	2	1
0090	1	3	8	1	1	2	3	Teaching/Academic Rank	7	2	98	4	4	4	4	2	2	2	98	1	6	1	5	3	1	.	1	1	1	1	1	1	1	1	1	1	1	1	1	1	1	1	1	1	1	2	1	2	1
0091	1	3	7	1	1	1	1	Trader/Artisans/Business	4	1	1	4	5	4	5	2	2	2	98	1	4	1	10	4	1	1	1	1	1	1	1	1	1	1	1	1	1	1	1	1	1	1	1	2	2	2	2	2	1
0092	1	3	7	4	1	1	2	Teaching/Academic Rank	7	1	5	4	3	3	5	2	2	2	98	1	2	1	5	3	1	.	1	1	1	1	1	1	1	1	1	1	1	1	1	1	1	1	1	1	2	2	1	2	1
0094	1	3	8	1	2	1	2	Professional rank	6	2	98	4	5	5	5	2	2	2	98	1	3	1	4	3	1	1	1	1	1	1	1	1	1	1	1	1	1	1	1	1	1	1	1	2	2	2	2	2	1
0095	2	5	8	1	2	2	1	Administrative Rank	7	2	98	3	4	4	4	1	1	1	2	1	6	1	10	4	0	.	1	1	1	1	1	1	1	1	1	1	1	1	1	1	1	1	4	2	2	2	2	2	1
0096	2	4	7	1	2	2	1	Administrative Rank	4	1	98	1	1	1	4	1	2	2	2	1	1	1	10	4	0	.	1	1	1	1	1	1	1	1	1	1	1	1	1	1	1	1	1	1	1	2	1	2	1
0097	2	1	6	1	1	1	5	Administrative Rank	4	2	98	4	4	3	4	1	1	1	1	1	1	1	4	2	1	1	1	1	1	1	1	1	1	1	1	1	1	1	1	1	1	1	1	2	1	2	2	2	1
0098	2	3	7	1	1	1	1	Administrative Rank	5	2	98	3	5	4	4	2	2	1	98	1	1	1	10	4	0	.	1	1	1	1	1	1	1	1	1	1	1	1	1	1	1	1	1	3	2	2	1	2	1
0100	1	3	7	1	1	1	1	Administrative Rank	5	1	2	3	5	4	4	2	2	2	98	1	3	1	4	2	1	1	1	1	1	1	1	1	1	1	1	1	1	1	1	1	1	1	1	1	2	2	1	2	1
0102	2	3	10	4	2	4	1	Administrative Rank	6	2	98	3	4	2	2	1	2	2	2	1	1	1	3	3	1	1	1	1	1	1	1	1	1	1	1	1	1	1	1	1	1	1	1	1	2	1	1	1	1
0103	1	3	8	2	1	1	1	Administrative Rank	4	1	3	2	3	3	2	2	2	2	98	1	2	1	7	2	1	.	1	1	1	1	1	1	1	1	1	1	1	1	1	1	1	1	4	2	1	2	2	2	1
0104	1	3	8	1	1	1	6	Administrative Rank	4	2	98	2	4	4	4	2	2	2	98	1	1	1	3	3	1	1	1	1	1	1	1	1	1	1	1	1	1	1	1	1	1	1	4	1	1	2	1	2	1
0105	1	3	7	1	1	2	2	Administrative Rank	7	2	98	4	3	3	3	2	2	2	98	1	3	1	10	4	0	1	1	1	1	1	1	1	1	1	1	1	1	1	1	1	1	1	4	2	2	2	2	2	1
0106	1	1	3	1	1	2	5	Administrative Rank	1	2	98	2	4	4	3	1	1	1	2	1	1	1	10	4	0	.	1	1	1	1	1	1	1	1	1	1	1	1	1	1	1	1	5	2	2	2	1	2	1
0107	2	2	5	1	1	1	5	Administrative Rank	1	1	98	3	4	3	3	2	2	2	98	1	4	1	2	3	0	.	1	1	1	1	1	1	1	1	1	1	1	1	1	1	1	1	4	2	2	2	2	2	2
0109	1	2	7	1	1	2	5	Administrative Rank	1	2	98	4	5	4	3	1	1	2	1	1	3	1	5	2	0	.	1	1	1	1	1	1	1	1	1	1	1	1	1	1	1	1	1	1	1	1	1	1	1
0110	1	3	8	1	1	1	1	Administrative Rank	4	2	98	3	5	4	5	2	2	2	98	1	1	1	7	2	0	.	1	1	1	1	1	1	1	1	1	1	1	1	1	1	1	1	1	1	2	3	3	3	3
0112	1	2	7	1	1	2	1	Administrative Rank	2	2	98	4	5	4	4	2	2	2	98	1	1	1	5	2	1	1	1	1	1	1	1	1	1	1	1	1	1	1	1	1	1	1	1	2	2	2	1	2	1
0118	1	3	8	1	2	2	2	Professional rank	7	2	98	4	5	5	4	2	2	2	98	1	1	1	4	2	1	1	1	1	1	1	1	1	1	1	1	1	1	1	1	1	1	1	1	2	2	2	2	2	1
0119	2	3	8	1	1	1	1	Professional rank	4	2	98	4	5	4	4	2	1	1	98	1	1	1	10	4	0	.	1	1	1	1	1	1	1	1	1	1	1	1	1	1	1	1	1	2	2	2	2	2	1
0122	2	3	8	2	2	1	4	Administrative Rank	7	1	98	4	4	5	5	1	2	2	3	1	4	1	4	2	0	.	1	1	1	1	1	1	1	1	1	1	1	1	1	1	1	1	1	2	2	2	2	2	2
0123	1	3	9	1	1	1	1	Administrative Rank	7	1	1	4	3	3	5	2	2	2	98	1	4	1	2	3	1	1	1	1	1	1	1	1	1	1	1	1	1	1	1	1	1	1	1	2	1	2	2	2	1
0126	1	5	3	1	2	1	6	Administrative Rank	4	1	98	3	4	4	5	1	1	1	3	1	1	1	10	4	0	.	1	1	1	1	1	1	1	1	1	1	1	1	1	1	1	1	1	3	2	2	2	2	1
0127	1	3	6	1	2	1	1	Administrative Rank	6	2	98	4	3	3	5	2	2	2	98	1	3	1	2	2	1	1	1	1	1	1	1	1	1	1	1	1	1	1	1	1	1	1	4	2	1	2	2	2	1
0129	1	3	8	1	2	1	1	Trader/Artisans/Business	1	2	98	3	3	3	4	1	1	1	3	1	3	1	9	3	0	1	1	1	1	1	1	1	1	1	1	1	1	1	1	1	1	1	1	2	2	2	1	2	2
0131	1	5	8	4	2	1	4	Trader/Artisans/Business	4	1	5	3	4	4	2	1	1	1	1	1	2	1	3	2	1	1	1	1	1	1	1	1	1	1	1	1	1	1	1	1	1	1	1	1	1	2	2	2	1
0132	1	5	9	1	2	2	1	Teaching/Academic Rank	7	1	5	3	4	4	2	1	2	2	2	1	3	1	1	1	1	1	1	1	1	1	1	1	1	1	1	1	1	1	1	1	1	1	1	3	2	2	1	2	1
0134	1	3	8	4	2	1	6	Professional rank	7	1	5	4	3	3	4	1	2	2	2	1	1	1	1	1	1	1	1	1	1	1	1	1	1	1	1	1	1	1	1	1	1	1	4	1	1	2	2	2	1
0136	1	1	9	1	2	2	2	Administrative Rank	4	1	1	3	4	4	3	2	2	2	98	1	1	1	10	4	0	.	1	1	1	1	1	1	1	1	1	1	1	1	1	1	1	1	5	2	2	2	2	2	1
0137	2	1	8	1	2	2	2	Administrative Rank	1	2	98	4	5	5	4	2	2	2	98	2	6	1	8	2	0	.	1	1	1	1	1	1	1	1	1	1	1	1	1	1	1	1	1	2	2	3	3	3	3
0139	2	3	7	1	1	1	1	Administrative Rank	3	2	98	3	4	3	3	1	2	2	1	1	6	1	10	4	0	.	1	1	1	1	1	1	1	1	1	1	1	1	1	1	1	1	1	2	2	2	2	2	1
0140	1	3	7	1	1	2	3	Administrative Rank	1	2	98	4	3	3	4	1	2	2	2	1	1	1	8	2	1	.	1	1	1	1	1	1	1	1	1	1	1	1	1	1	1	1	4	2	2	2	2	2	1
0141	2	3	8	1	2	1	2	Administrative Rank	3	1	1	3	4	5	5	1	1	1	98	1	2	1	8	2	0	.	1	1	1	1	1	1	1	1	1	1	1	1	1	1	1	1	1	1	1	1	1	1	1
0142	2	3	3	1	2	1	4	Administrative Rank	2	1	5	3	3	3	5	2	1	2	98	1	3	1	10	4	0	.	1	1	1	1	1	1	1	1	1	1	1	1	1	1	1	1	4	2	2	2	2	2	2
0144	2	4	9	4	2	1	2	Trader/Artisans/Business	7	1	3	4	3	3	5	2	2	2	98	1	4	1	8	3	1	1	1	1	1	1	1	1	1	1	1	1	1	1	1	1	1	1	1	1	1	2	1	2	1
0146	1	3	7	1	5	2	1	Administrative Rank	7	2	98	2	3	3	3	1	2	2	2	1	3	1	3	2	1	1	1	1	1	1	1	1	1	1	1	1	1	1	1	1	1	1	4	1	1	2	2	2	1
0148	1	1	3	2	2	1	1	Administrative Rank	6	2	98	3	4	5	4	1	2	2	2	1	3	1	10	4	0	.	1	1	1	1	1	1	1	1	1	1	1	1	1	1	1	1	1	1	1	2	1	2	2
0149	1	1	2	4	1	1	3	Administrative Rank	3	2	98	2	4	4	4	1	1	1	1	1	1	1	3	2	0	.	1	1	1	1	1	1	1	1	1	1	1	1	1	1	1	1	1	1	1	2	2	2	1
0150	2	5	6	1	2	2	4	Trader/Artisans/Business	3	2	98	3	4	3	3	2	2	2	98	1	2	1	1	1	0	.	1	1	1	1	1	1	1	1	1	1	1	1	1	1	1	1	1	3	2	3	3	3	3
0153	1	1	6	2	1	1	3	Administrative Rank	5	1	1	4	5	5	5	2	2	2	98	1	2	1	8	3	1	.	1	1	1	1	1	1	1	1	1	1	1	1	1	1	1	1	1	2	2	2	1	2	1
0154	2	2	6	1	1	1	2	Administrative Rank	4	1	5	2	3	4	2	1	1	1	2	1	3	1	10	4	0	.	1	1	1	1	1	1	1	1	1	1	1	1	1	1	1	1	1	2	1	2	2	2	1
0155	2	2	8	4	1	1	5	Administrative Rank	1	1	3	4	3	3	3	2	2	2	98	1	1	1	8	2	0	.	1	1	1	1	1	1	1	1	1	1	1	1	1	1	1	1	4	3	2	3	3	3	3
0157	1	2	8	2	1	1	1	Trader/Artisans/Business	5	1	1	3	4	3	5	2	2	2	98	1	3	1	8	2	1	1	1	1	1	1	1	1	1	1	1	1	1	1	1	1	1	1	1	2	1	2	2	2	1
0161	2	1	6	2	1	1	5	Trader/Artisans/Business	1	2	98	4	4	5	4	1	1	1	2	1	6	1	10	4	0	1	1	1	1	1	1	1	1	1	1	1	1	1	1	1	1	1	1	1	1	2	2	2	1
0162	2	3	8	1	1	1	1	Trader/Artisans/Business	7	2	98	3	4	4	5	1	1	1	3	1	2	1	2	2	1	1	1	1	1	1	1	1	1	1	1	1	1	1	1	1	1	1	1	1	2	3	3	3	3
0163	2	3	7	4	2	1	4	Trader/Artisans/Business	1	2	98	3	3	2	2	2	2	1	98	1	2	1	4	2	1	1	1	1	1	1	1	1	1	1	1	1	1	1	1	1	1	1	1	2	1	2	1	2	2
0164	1	5	9	4	2	1	6	Administrative Rank	7	1	2	3	4	3	5	2	2	2	98	1	3	1	6	3	0	1	1	1	1	1	1	1	1	1	1	1	1	1	1	1	1	1	1	1	1	3	3	3	3
0165	2	1	7	2	2	1	1	Administrative Rank	3	1	5	4	5	5	3	2	2	2	98	1	6	1	10	4	0	.	1	1	1	1	1	1	1	1	1	1	1	1	1	1	1	1	1	1	1	2	2	2	1
0166	2	3	6	4	1	1	2	Administrative Rank	3	2	98	4	5	5	4	2	2	2	98	2	6	1	4	2	1	.	1	1	1	1	1	1	1	1	1	1	1	1	1	1	1	1	1	2	2	2	2	2	1
0167	1	3	8	4	1	1	4	Administrative Rank	4	1	98	4	5	5	5	2	2	2	98	1	2	1	3	3	1	.	1	1	1	1	1	1	1	1	1	1	1	1	1	1	1	1	1	1	2	2	1	2	1
0168	2	1	1	4	1	1	4	Trader/Artisans/Business	1	1	1	3	5	4	5	2	2	1	98	2	6	1	10	4	0	1	.	.	.	.	.	.	0	.	.	.	.	.	.	.	.	.	4	1	2	2	2	2	2
0169	2	4	7	1	2	1	1	Professional rank	3	1	5	4	5	3	5	2	2	2	98	1	1	1	3	1	1	.	.	1	1	1	1	1	1	1	1	1	1	1	1	1	1	1	4	2	2	2	1	2	1
0170	2	5	1	4	2	1	4	Professional rank	4	1	98	4	5	2	4	2	2	2	98	1	1	1	3	3	1	.	1	1	1	1	1	1	1	1	1	1	1	1	1	1	1	1	1	1	1	2	2	2	1
0171	2	4	7	1	2	1	4	Administrative Rank	1	2	98	3	4	4	3	2	1	1	98	1	1	1	10	4	0	.	1	1	1	1	1	1	1	1	1	1	1	1	1	1	1	1	4	1	2	2	1	2	2
0172	2	1	8	1	2	1	1	Administrative Rank	7	2	98	4	5	4	5	2	2	2	98	1	1	1	3	3	1	.	1	1	1	1	1	1	1	1	1	1	1	1	1	1	1	1	1	2	2	2	2	2	1
0173	1	2	8	1	1	1	5	Administrative Rank	1	1	5	4	5	5	4	2	2	2	98	1	3	1	2	2	0	1	.	.	.	.	.	.	0	.	.	.	.	.	.	.	.	.	1	3	1	2	1	2	1
0176	2	1	6	1	1	1	5	Teaching/Academic Rank	1	2	98	4	5	5	5	2	2	2	98	1	3	1	10	4	0	1	1	1	1	1	1	1	1	1	1	1	1	1	1	1	1	1	1	2	2	2	2	2	1
0179	1	3	8	2	4	1	4	Teaching/Academic Rank	6	2	98	4	5	5	5	2	2	2	98	1	3	1	10	4	1	.	1	1	1	1	1	1	1	1	1	1	1	1	1	1	1	1	1	2	2	2	1	2	1
0180	1	6	6	2	2	1	4	Teaching/Academic Rank	7	1	98	3	3	3	3	2	2	2	98	1	2	1	10	4	0	.	1	1	1	1	1	1	1	1	1	1	1	1	1	1	1	1	1	3	3	3	3	3	3
0187	2	5	1	1	1	1	1	Professional rank	4	1	98	4	3	3	4	2	2	2	98	1	2	1	6	3	1	1	1	1	1	1	1	1	1	1	1	1	1	1	1	1	1	1	1	3	2	2	2	2	2
0198	2	5	8	2	2	1	1	Teaching/Academic Rank	5	2	98	3	3	3	3	1	2	2	2	1	3	1	2	2	0	1	1	1	1	1	1	1	1	1	1	1	1	1	1	1	1	1	4	1	2	2	2	2	2
0201	2	2	1	2	1	1	3	Professional rank	1	1	98	4	5	5	1	2	2	1	98	1	1	1	1	1	1	.	1	1	1	1	1	1	1	1	1	1	1	1	1	1	1	1	1	1	1	1	1	1	1
0202	2	2	8	1	1	1	2	Administrative Rank	2	1	1	3	3	3	4	2	2	2	98	1	1	1	5	2	1	1	1	1	1	1	1	1	1	1	1	1	1	1	1	1	1	1	1	1	1	2	2	2	2
0203	1	3	7	4	1	1	6	Administrative Rank	3	1	6	3	4	4	4	1	1	1	98	1	6	1	10	4	1	1	1	1	1	1	1	1	1	1	1	1	1	1	1	1	1	1	1	1	1	2	2	2	2
0205	2	2	8	4	1	1	1	Teaching/Academic Rank	7	1	5	3	4	4	3	2	2	2	98	1	6	1	3	3	0	1	1	1	1	1	1	1	1	1	1	1	1	1	1	1	1	1	1	3	2	2	2	2	2
0207	1	5	8	4	1	1	1	Teaching/Academic Rank	2	2	98	3	3	4	5	1	2	2	1	1	1	1	3	3	0	1	1	1	1	1	1	1	1	1	1	1	1	1	1	1	1	1	2	2	2	2	2	2	2
0208	2	4	6	1	2	1	4	Trader/Artisans/Business	3	1	98	3	3	4	1	2	2	2	98	1	1	1	4	3	1	.	1	1	1	1	1	1	1	1	1	1	1	1	1	1	1	1	1	1	1	2	2	2	2
0209	1	3	6	1	1	1	1	Clergy Rank	5	2	98	3	4	3	4	2	2	2	98	2	6	1	10	4	0	.	.	.	.	.	1	.	0	.	.	.	.	.	.	.	.	.	1	3	2	3	3	3	3
0210	2	4	8	1	2	1	1	Teaching/Academic Rank	4	2	98	3	4	5	4	2	2	1	98	1	3	1	10	4	0	1	1	1	1	1	1	1	1	1	1	1	1	1	1	1	1	1	4	2	1	2	2	2	2
0211	1	5	8	1	1	1	1	Teaching/Academic Rank	3	1	98	3	5	5	5	2	1	1	98	1	2	1	4	2	0	1	1	1	1	1	1	1	1	1	1	1	1	1	1	1	1	1	2	2	2	2	2	2	2
0212	1	5	7	1	1	1	1	Trader/Artisans/Business	2	2	98	3	5	5	5	1	1	1	1	1	2	1	4	2	1	.	1	1	1	1	1	1	1	1	1	1	1	1	1	1	1	1	2	2	2	2	2	2	2
0220	1	3	8	4	2	1	4	Trader/Artisans/Business	7	1	5	4	5	5	5	2	2	2	98	1	4	1	4	3	1	1	1	1	1	1	1	1	1	1	1	1	1	1	1	1	1	1	1	1	1	2	2	2	2
0230	1	1	1	4	1	1	1	Administrative Rank	4	2	98	4	5	5	4	2	2	2	98	1	3	1	6	3	0	.	1	1	1	1	1	1	1	1	1	1	1	1	1	1	1	1	1	3	2	3	3	3	3
0231	1	3	8	4	1	1	2	Trader/Artisans/Business	6	1	1	4	5	5	5	2	2	2	98	1	3	1	3	3	0	.	1	1	1	1	1	1	1	1	1	1	1	1	1	1	1	1	1	1	2	2	2	2	2
0232	1	1	2	4	1	1	1	Teaching/Academic Rank	4	2	98	4	5	5	4	2	2	2	98	1	3	1	6	3	0	.	1	1	1	1	1	1	1	1	1	1	1	1	1	1	1	1	1	3	2	3	3	3	3
0233	1	4	2	4	1	1	1	Professional rank	4	2	98	4	5	5	4	2	2	2	98	1	3	1	3	3	0	.	1	1	1	1	1	1	1	1	1	1	1	1	1	1	1	1	1	3	2	3	3	3	3
0234	1	3	2	4	1	1	1	Professional rank	4	2	98	4	5	5	4	2	2	2	98	1	3	1	6	3	0	.	1	1	1	1	1	1	1	1	1	1	1	1	1	1	1	1	1	3	2	3	3	3	3
0235	1	2	2	4	1	1	1	Professional rank	4	2	98	4	5	5	4	2	2	2	98	1	3	1	2	3	0	.	1	1	1	1	1	1	1	1	1	1	1	1	1	1	1	1	1	2	2	2	2	2	2
0236	1	3	2	4	1	1	1	Professional rank	4	2	98	4	5	5	3	2	2	2	98	1	3	1	6	3	0	.	1	1	1	1	1	1	1	1	1	1	1	1	1	1	1	1	1	3	2	3	3	3	3
0237	1	1	2	4	1	1	1	Professional rank	4	2	98	4	5	5	3	2	2	2	98	1	3	1	2	3	0	.	1	1	1	1	1	1	1	1	1	1	1	1	1	1	1	1	1	2	2	2	2	2	2
0238	1	1	2	4	1	1	1	Teaching/Academic Rank	4	2	98	4	5	5	4	2	2	2	98	1	3	1	5	3	0	.	1	1	1	1	1	1	1	1	1	1	1	1	1	1	1	1	2	2	2	2	2	2	2
0239	1	3	7	1	1	1	1	Teaching/Academic Rank	4	1	1	4	5	4	5	2	2	2	98	1	3	1	10	4	0	.	1	1	1	1	1	1	1	1	1	1	1	1	1	1	1	1	2	2	2	2	2	2	2
0240	1	1	8	1	2	1	4	Teaching/Academic Rank	4	1	98	4	4	4	5	1	1	1	2	2	6	1	5	3	0	1	1	1	1	1	1	1	1	1	1	1	1	1	1	1	1	1	2	2	2	2	1	2	2
0241	1	1	6	4	1	1	1	Teaching/Academic Rank	4	2	98	4	5	4	2	2	2	1	98	1	3	1	6	3	0	.	1	1	1	1	1	1	1	1	1	1	1	1	1	1	1	1	2	3	2	3	3	3	3
0242	1	5	3	4	1	1	1	Others	4	2	98	4	5	5	4	2	2	2	98	1	3	1	5	3	0	.	1	1	1	1	1	1	1	1	1	1	1	1	1	1	1	1	2	3	3	3	3	3	3
0243	1	1	3	4	1	1	1	Administrative Rank	4	2	98	4	5	5	4	2	2	2	98	1	3	1	4	3	0	.	1	1	1	1	1	1	1	1	1	1	1	1	1	1	1	1	2	2	2	2	2	2	2
0244	1	3	3	4	1	1	1	Administrative Rank	4	2	98	4	5	5	4	2	2	2	98	1	3	1	6	3	0	.	1	1	1	1	1	1	1	1	1	1	1	1	1	1	1	1	2	2	2	2	1	2	2
0245	1	2	3	4	1	1	1	Administrative Rank	4	2	98	4	5	5	4	2	2	2	98	1	3	1	4	3	0	.	1	1	1	1	1	1	1	1	1	1	1	1	1	1	1	1	2	2	2	2	2	2	2
0246	1	4	3	4	1	1	1	Administrative Rank	4	2	98	4	5	5	4	2	2	2	98	1	3	1	6	3	0	.	1	1	1	1	1	1	1	1	1	1	1	1	1	1	1	1	2	2	2	2	1	2	2
0247	1	3	3	4	1	1	1	Clergy Rank	4	2	98	4	5	5	4	2	2	2	98	1	3	1	4	3	0	.	1	1	1	1	1	1	1	1	1	1	1	1	1	1	1	1	2	2	2	2	1	2	2
0248	2	2	3	4	1	1	1	Professional rank	4	2	98	4	5	5	4	2	2	2	98	1	3	1	4	3	0	.	1	1	1	1	1	1	1	1	1	1	1	1	1	1	1	1	2	3	3	3	3	3	3
0249	1	4	7	2	2	1	1	Professional rank	4	2	98	4	5	5	5	2	2	2	98	1	1	1	6	3	0	.	1	1	1	1	1	1	1	1	1	1	1	1	1	1	1	1	2	2	2	3	3	3	3
0250	2	3	6	4	1	1	1	Administrative Rank	4	2	98	4	5	5	3	2	2	2	98	1	3	1	3	3	0	.	1	1	1	1	1	1	1	1	1	1	1	1	1	1	1	1	2	2	2	2	1	2	2
0251	1	1	7	3	2	2	1	Administrative Rank	4	2	98	4	5	5	5	2	2	2	98	1	3	1	3	3	0	.	1	1	1	1	1	1	1	1	1	1	1	1	1	1	1	1	2	2	2	2	2	2	2
0252	2	2	8	1	2	1	1	Administrative Rank	4	2	98	4	5	5	5	2	2	2	98	1	3	1	2	3	0	.	1	1	1	1	1	1	1	1	1	1	1	1	1	1	1	1	2	2	2	2	2	2	2
0253	2	3	6	4	1	1	1	Teaching/Academic Rank	4	2	98	4	5	5	5	2	2	2	98	1	3	1	2	3	0	.	1	1	1	1	1	1	1	1	1	1	1	1	1	1	1	1	2	2	2	2	1	2	2
0254	2	3	6	4	1	1	1	Teaching/Academic Rank	4	2	98	4	5	5	3	2	2	2	98	1	3	1	6	3	0	.	1	1	1	1	1	1	1	1	1	1	1	1	1	1	1	1	2	2	2	2	2	2	2
0255	2	2	6	4	1	1	1	Teaching/Academic Rank	4	2	98	4	5	5	4	2	2	2	98	1	3	1	2	3	0	.	1	1	1	1	1	1	1	1	1	1	1	1	1	1	1	1	2	2	2	2	2	2	2
0256	2	3	6	4	1	1	1	Trader/Artisans/Business	4	2	98	4	5	5	3	2	2	2	98	1	3	1	2	3	0	.	1	1	1	1	1	1	1	1	1	1	1	1	1	1	1	1	2	2	2	2	1	2	2
0257	2	1	6	4	1	1	1	Teaching/Academic Rank	4	2	98	4	5	5	4	2	2	2	98	1	3	1	1	3	0	.	1	1	1	1	1	1	1	1	1	1	1	1	1	1	1	1	2	2	2	2	2	2	2
0258	2	3	6	4	1	1	1	Teaching/Academic Rank	4	2	98	4	5	5	2	2	2	2	98	1	3	1	1	3	0	.	1	1	1	1	1	1	1	1	1	1	1	1	1	1	1	1	2	2	2	2	1	2	2
0259	2	2	6	4	1	1	1	Teaching/Academic Rank	4	2	98	4	5	5	3	2	2	2	98	1	3	1	1	3	0	.	1	1	1	1	1	1	1	1	1	1	1	1	1	1	1	1	2	2	2	3	3	3	3
0260	1	1	6	1	1	1	1	Trader/Artisans/Business	4	2	98	4	5	5	2	2	2	2	98	1	3	1	1	3	0	.	1	1	1	1	1	1	1	1	1	1	1	1	1	1	1	1	2	2	2	2	2	2	2
0262	1	1	5	1	1	1	1	Teaching/Academic Rank	4	2	98	4	5	5	3	2	2	2	98	1	1	1	1	3	0	.	1	1	1	1	1	1	1	1	1	1	1	1	1	1	1	1	2	2	2	3	3	3	3
0263	2	2	8	2	2	1	1	Professional rank	4	2	98	4	5	5	4	2	2	2	98	1	3	1	3	3	0	.	1	1	1	1	1	1	1	1	1	1	1	1	1	1	1	1	2	2	2	2	2	2	2
0264	2	2	8	1	2	3	1	Professional rank	4	2	98	4	5	5	5	2	2	2	98	1	1	1	2	3	0	.	1	1	1	1	1	1	1	1	1	1	1	1	1	1	1	1	2	2	2	3	3	3	3
0265	1	1	6	2	2	1	3	Administrative Rank	3	2	98	4	4	4	4	1	1	1	2	1	3	1	3	1	1	1	1	1	1	1	1	1	1	1	1	1	1	1	1	1	1	1	2	1	2	2	2	2	2
0266	1	3	8	2	2	1	1	Administrative Rank	4	2	98	4	4	4	4	1	2	1	3	2	6	1	5	2	1	1	1	1	1	1	1	1	1	1	1	1	1	1	1	1	1	1	2	1	2	2	2	2	2
0267	2	2	8	1	1	2	6	Administrative Rank	4	1	1	3	4	5	4	1	1	1	2	1	3	1	5	2	1	1	1	1	1	1	1	1	1	1	1	1	1	1	1	1	1	1	4	1	2	2	1	2	2
0268	1	2	5	1	1	1	6	Teaching/Academic Rank	3	2	98	3	4	5	4	1	1	1	2	1	3	1	9	2	1	1	1	1	1	1	1	1	1	1	1	1	1	1	1	1	1	1	4	1	2	2	2	2	2
0269	2	2	8	1	1	1	6	Teaching/Academic Rank	4	1	6	3	4	5	4	1	1	1	2	1	3	1	9	2	1	1	1	1	1	1	1	1	1	1	1	1	1	1	1	1	1	1	4	1	2	2	1	2	2
0270	1	2	7	3	1	3	6	Teaching/Academic Rank	1	2	98	3	4	5	4	1	1	1	3	1	3	1	8	2	1	1	1	1	1	1	1	1	1	1	1	1	1	1	1	1	1	1	2	1	2	2	1	2	2
0271	2	3	8	1	1	1	1	Trader/Artisans/Business	4	1	6	3	5	5	4	1	1	1	2	1	3	1	3	2	1	1	1	1	1	1	1	1	1	1	1	1	1	1	1	1	1	1	4	1	2	2	2	2	2
0272	2	3	8	1	2	1	6	Teaching/Academic Rank	6	1	98	3	4	5	4	1	1	1	2	1	3	1	3	2	1	1	1	1	1	1	1	1	1	1	1	1	1	1	1	1	1	1	4	1	2	2	2	2	2
0273	2	2	6	3	1	2	6	Teaching/Academic Rank	1	2	98	4	4	4	4	1	1	1	2	1	3	1	2	2	1	1	1	1	1	1	1	1	1	1	1	1	1	1	1	1	1	1	2	1	2	2	2	2	2
0274	2	4	5	1	3	1	6	Teaching/Academic Rank	2	1	6	3	4	5	4	1	1	1	3	1	3	1	1	2	1	1	1	1	1	1	1	1	1	1	1	1	1	1	1	1	1	1	2	1	2	2	1	2	2
0275	2	5	8	2	5	1	6	Trader/Artisans/Business	4	1	2	3	4	5	4	1	1	1	3	1	3	1	1	2	1	1	1	1	1	1	1	1	1	1	1	1	1	1	1	1	1	1	2	1	2	2	2	2	2
0276	1	2	4	3	1	2	3	Teaching/Academic Rank	1	2	98	3	4	4	4	1	1	1	2	2	6	1	10	4	1	1	1	1	1	1	1	1	1	1	1	1	1	1	1	1	1	1	4	1	2	2	2	2	2
0277	2	2	7	2	3	3	5	Professional rank	1	1	1	4	3	4	5	1	1	1	3	1	3	1	1	2	1	1	1	1	1	1	1	1	1	1	1	1	1	1	1	1	1	1	2	1	2	2	2	2	2
0278	1	4	5	1	3	2	2	Professional rank	6	2	98	3	5	5	4	1	1	1	2	1	3	1	1	2	1	1	1	1	1	1	1	1	1	1	1	1	1	1	1	1	1	1	2	1	2	2	1	2	2
0279	2	3	9	1	2	1	3	Administrative Rank	5	1	1	4	4	5	4	1	1	2	2	1	1	1	1	2	1	1	1	1	1	1	1	1	1	1	.	1	.	1	1	1	1	1	4	1	2	2	2	2	2
0280	1	3	7	2	1	2	1	Administrative Rank	5	2	98	3	3	4	4	2	2	1	98	1	1	1	2	3	1	.	1	1	1	1	1	1	1	1	1	.	1	1	1	1	1	1	2	1	1	2	1	2	2
0281	2	2	7	1	1	1	1	Administrative Rank	3	2	98	4	5	5	4	2	2	2	98	1	1	1	3	3	1	.	1	1	1	1	1	1	1	1	1	1	1	1	1	1	1	1	3	1	1	2	2	2	2
0282	2	3	7	4	2	1	1	Administrative Rank	5	2	98	3	4	5	4	2	2	2	98	1	1	1	2	3	1	.	1	1	1	1	1	1	1	1	1	1	1	1	1	1	1	1	2	1	1	2	1	2	2
0283	1	3	7	4	2	3	2	Administrative Rank	7	2	98	3	4	4	4	2	2	2	98	1	2	1	1	3	1	1	1	1	1	1	1	1	1	1	1	1	1	1	1	1	1	1	2	1	1	2	2	2	2
0284	2	5	7	4	5	3	6	Administrative Rank	7	1	1	3	3	3	4	2	2	2	98	1	1	1	1	3	1	.	1	1	1	1	1	1	1	1	1	1	1	1	1	1	1	1	3	1	1	2	1	2	2
0285	1	2	7	4	1	3	1	Administrative Rank	4	1	1	3	3	4	4	2	2	2	98	1	1	1	1	3	1	.	1	1	1	1	1	1	1	1	1	1	1	1	1	1	1	1	2	1	1	2	2	2	2
0287	2	1	8	1	1	1	2	Administrative Rank	4	1	98	4	5	3	5	2	2	2	98	1	6	1	1	2	1	1	1	1	1	1	1	1	1	1	1	1	1	1	1	1	1	1	2	2	2	2	2	2	2
0288	2	3	8	4	2	1	2	Administrative Rank	6	1	1	4	5	3	2	2	2	2	98	1	3	1	7	2	0	.	1	1	1	1	1	1	1	1	1	1	.	.	.	.	.	.	2	2	1	2	2	2	2
0289	1	3	8	1	1	1	2	Administrative Rank	7	1	1	4	4	4	5	2	2	2	98	2	6	1	1	2	0	.	1	1	1	1	1	1	1	1	1	1	1	1	1	1	1	1	2	1	2	2	1	2	2
0290	1	4	9	1	1	2	1	Administrative Rank	6	1	98	3	3	3	4	2	2	2	98	1	4	1	3	3	1	1	1	1	1	.	.	.	0	1	1	.	1	1	1	.	.	.	4	1	1	2	2	2	2
0291	1	3	8	1	2	1	1	Administrative Rank	3	1	1	3	4	5	1	1	1	1	2	1	1	1	3	2	0	1	1	1	1	1	1	1	1	1	1	1	1	1	1	1	1	1	4	2	1	2	2	2	2
0292	1	1	7	4	1	1	1	Administrative Rank	3	1	1	3	4	5	2	1	1	1	2	1	1	1	3	3	1	.	1	1	1	.	.	.	0	.	.	.	.	.	.	.	.	.	1	1	2	2	2	2	2
0293	1	2	9	1	1	2	2	Administrative Rank	4	1	98	3	4	4	1	2	2	2	98	1	1	1	3	3	1	.	1	1	1	1	1	1	1	1	.	.	.	.	.	.	.	.	2	1	1	2	2	2	2
0294	2	3	8	1	2	1	5	Administrative Rank	2	1	98	4	5	5	4	2	2	2	98	1	4	1	3	3	1	1	1	1	.	.	.	1	1	1	1	.	.	.	.	.	.	.	2	1	3	2	1	2	2
0295	2	2	8	1	1	1	5	Administrative Rank	4	1	98	4	4	4	4	1	1	1	2	1	6	1	3	2	1	1	1	1	.	1	1	1	1	1	1	.	.	.	.	.	.	.	2	3	3	2	2	2	2
0296	2	3	8	1	2	1	2	Administrative Rank	7	2	98	3	4	4	4	2	2	2	98	1	2	1	2	3	1	1	1	1	.	1	1	1	1	1	1	1	1	1	1	1	1	1	1	1	2	2	2	2	2
0297	1	2	6	1	1	2	5	Teaching/Academic Rank	4	2	98	3	4	5	3	1	1	1	1	2	6	1	10	4	0	.	1	1	1	.	1	1	1	1	1	.	.	.	.	.	.	.	2	1	2	1	1	1	1
0298	1	2	7	1	1	1	2	Teaching/Academic Rank	2	1	1	3	3	4	5	2	2	2	98	1	4	1	2	2	1	.	1	1	1	1	1	1	1	1	1	1	1	1	1	1	1	1	2	1	1	2	2	2	2
0302	2	3	9	2	1	1	2	Professional rank	4	2	98	4	5	4	1	1	1	1	3	1	4	1	2	3	1	.	1	1	1	1	1	1	1	1	.	1	.	.	1	1	1	1	1	1	1	1	1	1	1
0303	2	3	8	1	1	1	6	Professional rank	5	2	98	4	5	5	5	1	1	1	2	1	5	1	5	3	1	.	1	1	.	1	1	1	1	1	1	.	1	1	.	1	1	1	1	1	1	2	2	2	2
0304	2	3	8	2	1	1	1	Administrative Rank	2	2	98	3	4	5	4	2	2	2	98	1	4	1	5	3	1	.	1	1	1	.	1	1	1	1	.	.	.	1	.	1	1	1	4	2	1	2	2	2	2
0305	2	4	8	2	2	1	2	Administrative Rank	6	2	98	3	3	3	4	1	1	1	2	1	1	1	5	3	1	.	1	1	1	1	1	1	1	1	1	1	1	1	.	1	1	1	2	1	2	2	2	2	2
0306	2	4	8	2	2	1	2	Administrative Rank	7	1	1	4	5	5	5	1	1	1	2	1	6	1	5	3	1	.	1	1	1	1	1	1	1	1	1	1	.	1	1	1	1	1	1	2	2	2	2	2	2
0308	1	3	7	2	1	1	2	Administrative Rank	7	2	98	4	4	5	4	1	1	1	3	1	1	1	4	3	1	.	1	1	1	1	1	1	1	1	1	1	1	1	1	1	1	1	4	1	1	2	2	2	2
0309	2	3	8	1	2	1	1	Administrative Rank	6	1	6	4	5	3	5	1	1	1	3	1	6	1	6	3	1	.	1	1	1	1	1	1	1	1	1	1	1	1	1	1	1	1	5	1	1	2	2	2	2
0310	1	1	8	1	2	1	2	Administrative Rank	7	1	6	4	5	3	5	2	2	2	98	1	3	1	10	4	0	.	1	1	.	.	.	.	0	.	.	.	.	.	.	.	.	.	2	2	2	2	2	2	2
0311	2	4	9	1	4	1	1	Administrative Rank	3	1	3	3	5	5	5	2	2	2	98	1	4	1	4	3	1	1	1	1	1	1	1	1	1	1	1	1	1	1	1	1	1	1	2	1	1	2	2	2	2
0312	1	1	8	1	1	1	1	Teaching/Academic Rank	4	1	98	3	5	4	4	2	2	2	98	1	6	1	6	3	1	1	1	1	1	1	1	1	1	1	1	1	1	1	1	1	1	1	2	3	3	2	2	2	2
0317	2	2	8	1	1	2	3	Professional rank	5	2	98	3	4	5	4	1	1	1	2	1	1	1	4	2	1	1	1	1	1	1	1	1	1	1	1	1	.	1	1	1	1	1	4	1	2	2	2	2	2
0318	2	3	8	2	2	1	2	Professional rank	4	2	98	4	5	5	5	2	2	2	98	1	3	1	4	3	0	.	1	1	1	1	1	1	1	1	1	1	1	1	1	1	1	1	2	2	2	2	2	2	2
0319	2	5	8	2	2	1	6	Administrative Rank	4	2	98	4	5	5	5	2	2	2	98	1	3	1	6	3	0	.	1	1	1	1	1	1	1	1	1	1	1	1	.	1	1	1	2	2	2	2	2	2	2
0320	2	2	7	4	2	1	4	Administrative Rank	4	2	98	4	5	5	5	2	2	2	98	1	3	1	4	3	0	.	1	1	.	1	1	.	1	1	.	1	1	.	1	.	.	1	2	2	2	2	2	2	2
0321	1	2	7	2	2	1	2	Administrative Rank	4	2	98	4	5	5	1	2	2	2	98	1	3	1	6	3	0	.	1	1	1	.	1	1	1	1	.	.	.	1	1	1	.	1	2	2	2	2	2	2	2
0322	1	1	5	1	1	2	2	Administrative Rank	4	2	98	4	5	5	5	2	2	2	98	1	3	1	4	3	0	.	1	1	.	1	1	.	1	1	.	1	.	.	.	.	.	1	2	2	2	2	2	2	2
0323	2	1	6	3	1	2	2	Administrative Rank	4	2	98	4	5	5	5	2	2	2	98	1	3	1	4	3	0	.	1	1	1	1	1	1	1	1	1	1	1	1	1	.	1	1	2	2	2	2	2	2	2
0324	2	3	8	4	2	1	2	Administrative Rank	5	2	98	4	5	5	5	2	2	2	98	1	3	1	4	3	0	.	1	1	1	.	.	1	1	1	.	1	.	1	1	1	1	1	2	2	2	2	2	2	2
0325	1	2	8	1	1	1	2	Administrative Rank	5	2	98	4	5	5	5	2	2	2	98	1	2	1	6	3	0	.	1	1	1	1	1	1	1	1	1	1	1	1	.	1	1	1	2	2	2	2	2	2	2
0326	2	1	6	1	1	1	2	Administrative Rank	5	2	98	4	5	5	2	2	2	1	98	1	3	1	4	3	0	.	1	1	1	1	1	1	1	1	1	1	1	1	1	1	1	1	2	2	2	3	3	3	3
0327	1	4	7	3	4	2	2	Teaching/Academic Rank	5	2	98	4	5	5	5	2	2	2	98	1	3	1	2	3	0	.	1	1	1	1	1	1	1	1	1	1	1	1	1	1	1	1	2	2	2	2	2	2	2
0328	1	4	8	2	2	1	2	Teaching/Academic Rank	6	2	98	4	5	5	4	1	1	1	2	1	4	1	2	3	1	1	1	1	1	1	1	1	1	1	1	1	1	1	1	1	1	1	2	2	2	2	2	2	2
0329	2	2	7	1	1	1	2	Others	5	1	98	4	5	5	4	2	2	2	98	1	3	1	6	3	0	1	1	1	.	.	.	.	0	.	1	.	.	.	.	.	.	1	2	2	2	2	2	2	2
0330	2	2	8	3	2	2	2	Administrative Rank	5	2	98	4	5	5	4	2	2	2	98	1	3	1	2	3	0	1	.	.	.	.	.	.	0	.	.	.	.	.	.	.	.	1	2	2	2	2	2	2	2
0331	2	2	9	2	1	1	2	Administrative Rank	5	2	98	4	5	5	4	2	2	2	98	1	3	1	2	3	0	1	.	.	.	.	.	.	0	.	.	.	.	1	.	.	1	.	1	2	2	2	2	2	2
0332	1	2	4	2	1	1	2	Teaching/Academic Rank	5	2	98	4	5	5	4	2	2	2	98	1	3	1	1	3	0	1	.	.	.	.	.	.	0	.	1	1	.	.	1	.	1	.	2	2	2	2	2	2	2
0333	1	1	4	1	1	1	2	Teaching/Academic Rank	5	2	98	4	5	5	4	2	2	2	98	1	3	1	1	3	1	.	.	.	.	.	.	.	0	.	.	1	.	.	.	.	.	.	2	2	2	2	2	2	2
0334	1	2	8	1	1	1	2	Teaching/Academic Rank	5	2	98	4	5	5	4	2	2	2	98	1	3	1	1	3	0	1	.	.	.	.	.	.	0	.	1	1	.	.	1	.	.	.	1	2	2	2	2	2	2
0335	1	3	7	2	1	1	2	Professional rank	5	2	98	4	5	5	4	2	2	2	98	1	3	1	1	3	0	1	.	.	.	.	.	.	0	.	1	1	.	1	1	.	.	1	2	2	2	2	2	2	2
0336	1	2	9	3	1	2	2	Professional rank	5	2	98	4	5	5	4	2	2	2	98	1	1	1	1	3	0	1	.	.	.	.	.	.	0	1	1	1	1	.	.	1	.	.	4	2	2	2	2	2	2
0337	1	3	7	3	2	2	2	Administrative Rank	5	2	98	4	5	5	4	2	2	2	98	1	3	1	1	3	0	1	.	.	.	.	.	.	1	1	1	1	.	1	1	.	.	1	2	2	2	2	2	2	2
0338	1	3	4	1	2	1	2	Administrative Rank	5	2	98	4	5	5	4	2	2	2	98	1	3	1	7	3	0	1	.	.	.	.	.	.	0	.	.	1	1	.	.	1	.	.	2	2	2	2	2	2	2
0339	2	2	9	2	1	1	2	Administrative Rank	5	2	98	4	5	5	4	2	2	2	98	1	3	1	6	3	0	1	.	.	.	.	.	.	0	.	1	1	.	1	1	.	.	.	2	2	2	2	2	2	2
0340	1	4	9	3	1	2	2	Teaching/Academic Rank	5	2	98	4	5	5	4	2	2	2	98	1	3	1	7	3	0	1	.	.	.	.	.	.	1	1	.	.	.	1	.	1	.	1	2	2	2	2	2	2	2
0341	2	3	8	3	1	2	2	Teaching/Academic Rank	5	2	98	4	5	5	4	2	2	2	98	1	3	1	1	3	0	1	.	.	.	.	.	.	0	.	1	1	.	1	.	.	.	.	2	2	2	2	2	2	2
0342	2	4	9	2	2	1	2	Teaching/Academic Rank	5	2	98	4	5	5	4	2	2	2	98	1	3	1	1	3	0	1	.	.	.	.	.	.	1	1	.	1	1	.	1	1	.	1	2	2	2	2	2	2	2
0343	1	3	9	1	2	1	2	Trader/Artisans/Business	5	2	98	4	5	5	4	2	2	2	98	1	3	1	1	3	0	1	.	.	.	.	.	.	0	.	1	1	.	1	.	.	.	.	2	2	2	2	2	2	2
0344	2	4	8	1	2	1	2	Teaching/Academic Rank	5	2	98	4	5	5	4	2	2	2	98	1	3	1	1	3	0	1	.	.	.	.	.	.	1	.	.	1	.	.	1	.	.	.	2	2	2	2	2	2	2
0346	2	3	9	2	2	1	2	Teaching/Academic Rank	5	2	98	4	5	5	4	2	2	2	98	1	3	1	3	3	0	1	.	.	.	.	.	.	0	1	.	1	.	1	1	1	.	1	2	2	2	2	2	2	2
0347	2	2	7	3	1	2	2	Trader/Artisans/Business	5	2	98	4	5	5	4	2	2	2	98	1	3	1	3	3	0	1	.	.	.	.	.	.	0	.	.	1	.	.	1	.	.	1	2	2	2	2	2	2	2
0348	2	3	6	1	2	1	3	Teaching/Academic Rank	2	2	98	3	4	2	1	1	2	2	2	1	3	1	3	3	1	.	1	1	1	1	1	1	1	1	1	1	1	1	1	1	1	1	4	1	2	2	2	2	2
0349	2	1	9	2	2	1	4	Trader/Artisans/Business	5	1	98	4	4	4	5	1	1	1	2	1	4	1	3	3	1	1	1	1	1	1	1	1	1	1	1	1	1	1	1	1	1	1	2	2	2	2	2	2	2
0350	1	3	8	3	2	2	2	Teaching/Academic Rank	5	2	98	4	5	5	5	2	2	2	98	1	3	1	3	3	1	1	1	1	1	1	1	1	1	1	1	1	1	1	1	1	1	1	2	2	2	2	2	2	2
0351	2	2	6	1	1	1	2	Trader/Artisans/Business	5	2	98	4	5	5	5	2	2	2	98	1	3	1	6	3	1	1	1	1	1	1	1	1	1	1	1	1	1	1	1	1	1	1	2	2	2	2	2	2	2
0352	2	2	8	2	1	1	2	Teaching/Academic Rank	5	2	98	4	5	5	5	2	2	2	98	1	3	1	3	3	1	1	1	1	1	1	1	1	1	1	1	1	1	1	1	1	1	1	2	2	2	2	2	2	2
0353	1	2	7	2	2	1	2	Trader/Artisans/Business	5	2	98	4	5	5	5	2	2	2	98	1	3	1	5	3	1	1	1	1	1	1	1	1	1	1	1	1	1	1	1	1	1	1	2	2	2	2	2	2	2
0354	2	4	8	2	2	1	2	Teaching/Academic Rank	5	2	98	4	5	5	3	2	2	2	98	1	3	1	5	3	1	1	1	1	1	1	1	1	1	1	1	1	1	1	1	1	1	1	2	2	2	2	2	2	2
0355	1	1	6	1	1	1	2	Trader/Artisans/Business	5	1	98	4	5	5	5	2	2	2	98	2	6	1	5	3	1	1	1	1	1	1	1	1	1	1	1	1	1	1	1	1	1	1	2	2	2	2	2	2	2
0356	2	4	8	1	1	1	2	Professional rank	5	2	98	4	5	5	5	2	2	2	98	1	3	1	1	3	1	1	1	1	1	1	1	1	1	1	1	1	1	1	1	1	1	1	2	2	2	2	2	2	2
0358	1	2	6	2	1	1	1	Trader/Artisans/Business	5	2	98	4	4	4	5	2	2	2	98	1	6	1	1	2	0	.	.	.	.	.	.	.	0	.	.	.	.	.	.	.	.	.	2	3	3	3	3	3	3
0359	1	1	6	2	1	1	1	Teaching/Academic Rank	5	2	98	4	4	4	1	2	2	1	98	1	6	1	1	1	0	.	.	.	.	.	.	.	0	.	.	.	.	.	.	.	.	.	2	2	2	2	2	2	2
0360	2	4	8	1	2	1	2	Professional rank	7	2	98	4	3	3	4	2	2	2	98	1	1	1	1	3	1	.	1	1	1	1	1	1	1	1	1	1	1	1	1	1	1	1	1	1	2	2	2	2	1
0361	2	4	6	1	2	1	3	Administrative Rank	4	2	98	3	3	3	4	2	2	2	98	1	1	1	5	3	1	.	1	1	1	1	1	1	1	1	1	1	1	1	1	1	1	1	3	1	1	2	2	2	2
0362	2	4	7	1	2	1	1	Trader/Artisans/Business	5	2	98	3	3	4	4	2	2	2	98	1	1	1	5	3	1	.	1	1	1	1	1	1	1	1	1	1	1	1	1	1	1	1	2	1	1	2	2	2	1
0363	1	2	8	1	1	1	5	Teaching/Academic Rank	5	1	98	4	5	5	5	1	1	1	1	1	1	1	9	3	1	.	1	1	1	1	1	1	1	1	1	1	1	1	1	1	1	1	1	1	2	2	2	2	1
0364	2	3	7	2	1	1	5	Professional rank	5	1	98	4	5	5	5	1	1	1	2	1	1	1	6	3	1	.	1	1	1	1	1	1	1	1	1	1	1	1	1	1	1	1	1	2	2	2	2	2	2
0365	2	2	6	2	1	1	5	Professional rank	5	1	98	4	5	5	5	2	2	2	98	1	1	1	9	3	1	.	1	1	1	1	1	1	1	1	1	1	1	1	1	1	1	1	2	1	1	2	2	2	2
0366	2	3	6	1	1	1	5	Professional rank	5	1	98	4	5	5	98	1	1	1	2	1	1	1	6	3	1	.	1	1	1	1	1	1	1	1	1	1	1	1	1	1	1	1	1	2	1	2	2	2	1
0367	2	1	8	4	1	1	4	Professional rank	5	2	98	4	5	5	4	2	2	2	98	1	3	1	9	3	0	.	.	.	.	.	.	.	0	.	.	.	.	.	.	.	.	.	2	2	2	2	2	2	1
0368	2	2	5	1	1	1	2	Professional rank	5	1	98	4	5	5	5	2	2	2	98	1	1	1	9	3	1	.	1	1	1	1	1	1	1	1	1	1	1	1	1	1	1	1	2	3	3	2	2	2	1
0369	1	5	6	1	2	1	4	Teaching/Academic Rank	7	2	98	4	3	3	5	1	1	1	2	1	1	1	4	3	1	.	1	1	1	1	1	1	1	1	1	1	1	1	1	1	1	1	2	1	3	2	2	2	1
0371	1	3	9	3	1	2	5	Teaching/Academic Rank	5	1	98	4	5	5	5	1	1	1	3	1	1	1	4	3	1	.	1	1	1	1	1	1	1	1	1	1	1	1	1	1	1	1	1	1	1	2	2	2	1
0372	2	3	8	3	2	2	6	Teaching/Academic Rank	2	1	1	3	3	3	4	1	1	1	2	1	6	1	4	3	1	.	1	1	1	1	1	1	1	1	1	1	1	1	1	1	1	1	2	1	1	2	1	2	1
0373	1	3	7	1	1	1	1	Teaching/Academic Rank	5	1	1	3	4	5	4	2	2	2	98	1	1	1	8	3	1	.	1	1	1	1	1	1	1	1	1	1	1	1	1	1	1	1	2	1	1	2	2	2	1
0374	2	5	7	2	2	1	1	Administrative Rank	7	2	98	3	4	5	4	2	2	2	98	1	1	1	8	3	1	.	1	1	1	1	1	1	1	1	1	1	1	1	1	1	1	1	2	1	1	2	2	2	2
0375	2	3	8	2	2	1	2	Administrative Rank	7	1	1	3	4	3	5	2	2	2	98	1	2	1	8	3	1	.	1	1	1	1	1	1	1	1	1	1	1	1	1	1	1	1	4	1	1	2	1	2	2
0376	1	5	3	1	2	2	3	Administrative Rank	7	1	98	3	4	4	4	2	2	2	98	2	4	1	10	4	0	.	1	1	1	1	1	1	1	1	1	1	1	1	1	1	1	1	2	1	3	2	2	2	2
0377	1	4	6	1	2	2	6	Administrative Rank	5	2	98	3	3	4	4	2	2	2	98	1	6	1	8	1	1	.	1	1	1	1	1	1	1	1	1	1	1	1	1	1	1	1	2	3	3	3	3	3	3
0378	1	5	6	2	2	1	6	Teaching/Academic Rank	5	2	98	3	4	3	4	2	2	2	98	1	1	1	10	4	1	.	1	1	1	1	1	1	1	1	1	1	1	1	1	1	1	1	2	3	3	2	2	2	2
0381	1	5	7	4	2	1	2	Administrative Rank	5	2	98	4	5	5	5	2	2	2	98	1	3	1	8	3	1	1	1	1	1	1	1	1	1	1	1	1	1	1	1	1	1	1	2	2	2	2	2	2	2
0382	1	3	7	2	2	1	1	Administrative Rank	5	1	1	3	4	5	4	2	2	2	98	1	1	1	8	3	1	.	1	1	1	1	1	1	1	1	1	1	1	1	1	1	1	1	3	1	1	2	1	2	1
0383	2	4	7	2	1	2	1	Administrative Rank	6	2	98	3	3	3	4	2	2	2	98	1	1	1	8	3	1	.	1	1	1	1	1	1	1	1	1	1	1	1	1	1	1	1	3	1	1	2	1	2	2
0384	2	4	7	3	2	2	1	Clergy Rank	6	2	98	3	3	3	4	2	2	2	98	1	1	1	8	3	1	.	1	1	1	1	1	1	1	1	1	1	1	1	1	1	1	1	3	1	1	2	1	2	1
0385	1	3	7	1	1	2	1	Teaching/Academic Rank	6	2	98	3	4	4	4	2	2	2	98	1	6	1	6	3	1	.	1	1	1	1	1	1	1	1	1	1	1	1	1	1	1	1	3	1	1	2	2	2	1
0388	1	3	8	4	1	1	2	Teaching/Academic Rank	7	2	98	4	5	5	5	2	2	2	98	1	1	1	4	3	1	.	1	1	1	1	1	1	1	1	1	1	1	1	1	1	1	1	2	1	1	2	2	2	1
0389	2	3	5	2	2	1	3	Teaching/Academic Rank	1	1	1	4	5	5	5	2	2	2	98	2	6	1	8	1	0	.	.	.	.	.	.	.	0	.	.	.	.	.	.	.	.	.	2	3	3	3	3	3	3
0392	2	3	4	1	2	2	2	Teaching/Academic Rank	5	1	98	4	3	3	3	2	2	2	98	1	6	1	10	4	0	.	1	1	1	1	1	1	1	1	1	1	1	1	1	1	1	1	2	3	3	2	1	2	2
0393	1	4	7	1	1	3	2	Clergy Rank	5	1	98	3	5	5	5	1	1	1	2	1	1	1	1	3	0	.	1	1	1	1	1	1	1	1	1	1	1	1	1	1	1	1	2	1	3	2	2	2	2
0394	1	4	9	2	2	1	4	Professional rank	7	2	98	4	5	5	4	1	1	1	3	1	1	1	1	3	1	.	1	1	1	1	1	1	1	1	1	1	1	1	1	1	1	1	5	1	1	2	1	2	2
0396	2	4	6	2	2	1	4	Administrative Rank	5	1	98	3	5	5	4	1	1	1	2	1	1	1	1	2	0	1	1	1	1	1	1	1	1	1	1	1	1	1	1	1	1	1	2	3	3	2	2	2	1
0397	1	2	6	1	1	1	2	Administrative Rank	5	2	98	4	3	3	5	1	2	1	1	1	1	1	10	4	0	.	1	1	1	1	1	1	1	1	1	1	1	1	1	1	1	1	2	1	3	2	2	2	2
0398	1	3	8	4	1	1	3	Administrative Rank	7	1	1	3	4	4	4	2	1	2	98	1	6	1	10	4	0	1	.	.	.	.	.	.	0	.	.	.	.	.	.	.	.	.	5	1	3	2	2	2	1
0399	2	4	7	4	2	1	1	Teaching/Academic Rank	6	1	1	3	4	4	4	1	1	1	2	1	4	1	3	3	1	.	1	1	1	1	1	1	1	1	1	1	1	1	1	1	1	1	4	1	2	2	2	2	1
0400	1	1	4	2	1	3	2	Teaching/Academic Rank	5	1	98	3	4	4	3	1	1	1	3	1	1	1	3	2	1	.	1	1	1	1	1	1	1	1	1	1	1	1	1	1	1	1	4	3	3	3	3	3	1
0401	2	1	7	1	1	1	6	Teaching/Academic Rank	5	2	98	3	3	3	5	1	1	1	1	1	6	1	3	1	0	.	.	.	.	.	.	.	0	.	.	.	.	.	.	.	.	.	4	1	3	3	3	3	3
0402	1	3	6	1	2	1	2	Trader/Artisans/Business	5	2	98	4	3	3	3	2	2	2	98	1	5	1	10	4	0	.	.	.	.	.	.	.	0	.	.	.	.	.	.	.	.	.	2	1	1	2	2	2	2
0403	1	3	3	1	1	1	1	Teaching/Academic Rank	1	1	98	4	4	5	5	2	2	2	98	1	1	1	1	1	1	1	1	1	1	1	1	1	1	1	1	1	1	1	1	1	1	1	2	1	1	2	2	2	1
0404	1	3	5	1	2	1	2	Others	5	2	98	3	4	3	4	1	1	1	1	1	6	1	2	3	0	.	.	.	.	.	.	.	0	.	.	.	.	.	.	.	.	.	2	3	3	2	2	2	2
0405	2	2	6	1	1	2	5	Teaching/Academic Rank	5	1	98	2	4	2	4	2	2	2	98	1	2	1	2	2	0	1	.	.	.	.	.	.	0	.	.	.	.	.	.	.	.	.	4	2	2	2	2	2	1
0406	2	1	5	2	1	1	4	Trader/Artisans/Business	5	2	98	4	5	5	4	2	2	2	98	2	6	1	4	1	0	.	.	.	.	.	.	.	0	.	.	.	.	.	.	.	.	.	2	3	3	3	3	3	3
0407	2	4	10	2	1	1	4	Teaching/Academic Rank	4	2	98	3	5	4	3	1	1	2	2	1	6	1	10	4	0	.	1	1	1	1	1	1	1	1	1	1	1	1	1	1	1	1	5	2	2	2	2	2	1
0409	1	2	8	2	1	1	2	Professional rank	5	1	98	4	5	5	3	2	2	2	98	1	4	1	4	2	1	.	1	1	1	1	1	1	1	1	1	1	1	1	1	1	1	1	2	3	3	2	2	2	2
0410	2	2	6	2	1	1	1	Administrative Rank	5	2	98	4	5	5	2	2	2	2	98	1	6	1	4	3	1	1	1	1	1	1	1	1	1	1	1	1	1	1	1	1	1	1	2	1	1	2	2	2	2
0411	2	1	7	1	1	1	5	Administrative Rank	5	2	98	3	5	4	1	2	2	2	98	1	6	1	4	3	0	1	1	1	1	1	1	1	1	1	1	1	1	1	1	1	1	1	2	2	2	2	2	2	1
0412	1	4	7	1	1	1	6	Administrative Rank	7	1	3	4	4	3	4	2	2	2	98	1	1	1	10	4	0	.	.	.	.	.	.	.	0	.	.	.	.	.	.	.	.	.	5	1	2	2	2	2	2
0413	2	4	6	2	2	1	4	Administrative Rank	1	2	98	3	4	4	4	1	2	2	2	1	1	1	10	4	0	.	.	.	.	.	.	.	0	.	.	.	.	.	.	.	.	.	2	2	2	2	2	2	1
0414	2	4	7	4	2	1	1	Administrative Rank	3	1	1	4	5	5	4	2	2	2	98	1	4	1	1	3	0	1	1	1	1	1	1	1	1	1	1	1	1	1	1	1	1	1	4	2	2	2	2	2	2
0415	1	1	6	4	1	1	5	Administrative Rank	1	1	98	4	5	3	3	2	2	2	98	1	4	1	1	1	1	1	1	1	1	1	1	1	1	1	1	1	1	1	1	1	1	1	2	3	3	2	2	2	2
0416	1	3	8	1	1	1	1	Administrative Rank	2	2	98	4	5	5	5	2	2	2	98	1	3	1	1	1	1	1	1	1	1	1	1	1	1	1	1	1	1	1	1	1	1	1	4	1	3	2	2	2	2
0417	2	3	8	4	1	1	3	Administrative Rank	5	1	98	3	4	3	5	1	1	1	2	1	4	1	10	4	0	.	1	1	1	1	1	1	1	1	1	1	1	1	1	1	1	1	1	3	3	2	2	2	2
0419	1	3	3	4	1	1	1	Administrative Rank	1	2	98	4	4	5	3	2	2	1	98	1	6	1	1	1	0	.	.	.	.	.	.	.	0	.	.	.	.	.	.	.	.	.	2	2	2	2	2	2	2
0420	1	1	6	4	1	1	3	Administrative Rank	5	1	98	4	5	5	1	2	2	2	98	2	6	1	10	4	0	.	.	.	.	.	.	.	0	.	.	.	.	.	.	.	.	.	2	3	2	2	2	2	2
0421	1	4	6	2	1	1	6	Administrative Rank	3	2	98	2	4	2	3	2	2	2	98	1	6	1	4	3	0	.	.	.	.	.	.	.	0	.	.	.	.	.	.	.	.	.	2	2	2	1	1	1	1
0422	1	4	1	2	1	1	3	Administrative Rank	5	1	98	3	4	4	2	1	1	1	3	1	5	1	10	4	0	.	.	.	.	.	.	.	0	.	.	.	.	.	.	.	.	.	2	1	3	2	2	2	2
0423	2	4	6	4	2	1	4	Administrative Rank	6	2	98	4	5	5	5	1	1	1	3	1	3	1	4	3	1	.	1	1	1	1	1	1	1	1	1	1	1	1	1	1	1	1	1	1	2	2	2	2	1
0425	2	1	3	1	1	1	3	Administrative Rank	5	1	98	3	4	4	5	2	2	2	98	1	3	1	1	1	0	.	1	1	1	1	1	1	1	1	1	1	1	1	1	1	1	1	2	2	2	1	1	1	1
0426	2	2	6	1	1	2	5	Administrative Rank	5	1	98	3	4	3	4	2	2	2	98	2	6	1	9	3	0	1	.	.	.	.	.	.	0	.	.	.	.	.	.	.	.	.	2	1	2	2	2	2	1
0427	2	3	8	1	2	1	5	Administrative Rank	6	1	1	4	4	5	4	1	1	1	1	1	3	1	9	3	1	1	1	1	1	1	1	1	1	1	1	1	1	1	1	1	1	1	1	1	1	3	3	3	3
0428	2	2	3	1	1	1	5	Teaching/Academic Rank	5	2	98	3	5	5	2	2	2	2	98	1	6	1	10	4	1	.	.	.	.	.	.	.	0	.	.	.	.	.	.	.	.	.	2	2	3	2	2	2	2
0430	2	1	8	2	1	1	5	Teaching/Academic Rank	5	2	98	3	5	4	5	2	1	1	98	2	6	1	10	4	0	.	.	.	.	.	.	.	0	.	.	.	.	.	.	.	.	.	2	2	2	2	2	2	1
0431	2	1	8	1	1	1	5	Trader/Artisans/Business	5	1	1	4	5	4	5	1	1	1	1	1	2	1	4	3	0	.	.	.	.	.	.	.	0	.	.	.	.	.	.	.	.	.	2	2	2	2	2	2	1
0432	2	1	3	2	1	1	3	Teaching/Academic Rank	5	2	98	3	3	3	3	1	1	1	2	2	6	1	4	3	1	.	.	.	.	.	.	.	0	.	.	.	.	.	.	.	.	.	2	3	3	2	2	2	1
0433	1	2	8	2	1	1	3	Professional rank	5	2	98	4	5	4	4	2	2	2	98	1	1	1	10	4	0	.	1	1	1	1	1	1	1	1	1	1	1	1	1	1	1	1	4	2	2	2	2	2	1
0435	2	1	6	4	1	1	5	Administrative Rank	7	2	98	3	4	3	5	2	2	2	98	2	6	1	1	1	0	1	.	.	.	.	.	.	0	.	.	.	.	.	.	.	.	.	2	2	3	2	2	2	2
0436	2	1	6	4	1	1	5	Administrative Rank	5	1	98	4	5	5	4	2	2	2	98	1	1	1	4	1	1	1	1	1	1	1	1	1	1	1	1	1	1	1	1	1	1	1	2	1	1	2	2	2	1
0437	1	5	8	1	2	1	1	Administrative Rank	7	2	98	3	3	3	4	2	2	2	98	1	6	1	10	4	1	1	1	1	1	1	1	1	1	1	1	1	1	1	1	1	1	1	2	2	1	2	2	2	2
0438	1	5	7	2	2	1	1	Administrative Rank	7	2	98	3	4	3	4	2	2	2	98	1	1	1	10	4	0	.	.	.	.	.	.	.	0	.	.	.	.	.	.	.	.	.	1	1	1	2	2	2	1
0439	2	1	4	1	2	1	1	Administrative Rank	7	2	98	3	4	5	4	1	1	1	2	2	6	1	10	4	1	1	1	1	1	1	1	1	1	1	1	1	1	1	1	1	1	1	4	3	2	1	1	1	1
0440	1	4	8	2	2	1	1	Administrative Rank	5	1	1	4	5	5	5	2	2	2	98	1	2	1	4	3	1	1	1	1	1	1	1	1	1	1	1	1	1	1	1	1	1	1	4	1	1	2	2	2	2
0441	2	5	8	1	2	2	1	Administrative Rank	7	2	98	4	5	5	5	2	2	2	98	1	3	1	4	3	0	1	1	1	1	1	1	1	1	1	1	1	1	1	1	1	1	1	4	1	1	2	2	2	2
0442	2	4	8	1	2	1	2	Administrative Rank	7	2	98	4	5	5	5	2	2	2	98	1	2	1	1	3	1	.	1	1	1	1	1	1	1	1	1	1	1	1	1	1	1	1	1	2	2	2	2	2	1
0443	1	4	9	3	2	1	1	Teaching/Academic Rank	7	1	1	3	5	5	4	1	1	1	2	1	1	1	1	3	1	1	1	1	1	1	1	1	1	1	1	1	1	1	1	1	1	1	3	1	2	2	2	2	2
0444	2	2	8	2	1	1	5	Teaching/Academic Rank	4	2	98	4	3	3	5	2	2	2	98	1	1	1	4	3	1	1	1	1	1	1	1	1	1	1	1	1	1	1	1	1	1	1	2	3	2	2	2	2	1
0445	2	2	8	1	1	1	5	Teaching/Academic Rank	4	1	1	2	3	4	4	1	1	1	2	1	1	1	4	3	1	1	1	1	1	1	1	1	1	1	1	1	1	1	1	1	1	1	1	1	2	2	2	2	1
0446	1	5	8	4	2	1	2	Trader/Artisans/Business	7	1	4	4	5	5	5	2	2	2	98	1	4	1	4	3	1	.	1	1	1	1	1	1	1	1	1	1	1	1	1	1	1	1	1	2	1	2	2	2	2
0447	1	4	8	1	2	1	3	Teaching/Academic Rank	6	2	98	4	5	5	5	2	2	2	98	1	1	1	4	2	0	1	1	1	1	1	1	1	1	1	1	1	1	1	1	1	1	1	2	2	2	2	2	2	2
0448	1	3	8	2	1	1	2	Professional rank	6	1	1	3	5	4	5	1	1	1	2	1	1	1	10	4	1	.	1	1	1	1	1	1	1	1	1	1	1	1	1	1	1	1	1	2	1	2	2	2	1
0449	2	2	10	1	1	1	5	Professional rank	5	2	98	4	5	5	4	2	2	2	98	1	6	1	4	3	1	.	1	1	1	1	1	1	1	1	1	1	1	1	1	1	1	1	2	3	1	2	2	2	2
0911	1	3	6	1	1	1	4	Administrative Rank	2	2	98	3	4	4	4	2	2	1	98	1	2	1	7	2	0	.	.	.	.	.	.	.	0	.	.	.	.	.	.	.	.	.	4	3	3	3	3	3	3
0912	2	1	6	1	1	2	4	Trader/Artisans/Business	5	2	98	4	5	4	5	2	2	2	98	1	3	1	10	4	1	1	.	.	.	.	.	.	0	.	.	.	.	.	.	.	.	.	4	1	2	2	2	2	1
0913	2	3	6	1	1	2	4	Trader/Artisans/Business	2	1	98	2	5	4	98	2	2	1	98	1	2	1	7	2	0	.	.	.	.	.	.	.	0	.	.	.	.	.	.	.	.	.	4	3	3	3	3	3	3
0914	2	2	6	1	2	2	3	Teaching/Academic Rank	1	2	98	4	5	5	5	2	2	2	98	1	4	1	4	3	1	1	1	1	1	1	1	1	1	1	1	1	1	1	1	1	1	1	4	1	1	1	1	1	1
0915	2	3	1	4	1	1	6	Trader/Artisans/Business	3	2	98	4	5	3	5	2	2	2	98	1	2	1	4	3	1	1	1	1	1	1	1	1	1	1	1	1	1	1	1	1	1	1	4	1	1	2	2	2	1
0916	2	3	8	4	2	1	4	Trader/Artisans/Business	2	2	98	3	4	5	2	2	2	1	98	1	2	1	10	4	0	.	.	.	.	.	.	.	0	.	.	.	.	.	.	.	.	.	4	3	3	3	3	3	3
0918	2	1	6	1	1	1	1	Trader/Artisans/Business	5	2	98	3	5	5	5	2	2	2	98	1	6	1	4	3	1	1	1	1	1	1	1	1	1	1	1	1	1	1	1	1	1	1	4	1	1	2	2	2	2
0919	2	1	6	1	1	2	4	Others	2	2	98	4	5	5	3	1	2	1	2	1	6	1	10	4	0	1	1	1	1	1	1	1	1	1	1	1	1	1	1	1	1	1	4	2	2	2	2	2	2
0921	1	5	10	1	2	2	2	Administrative Rank	7	1	1	4	5	5	5	2	2	2	98	1	4	1	4	3	1	1	1	1	1	1	1	1	1	1	1	1	1	1	1	1	1	1	4	1	1	2	2	2	2
0922	1	2	9	1	1	1	2	Professional rank	7	2	98	4	5	5	1	2	2	2	98	2	2	1	7	2	1	.	.	.	.	.	.	.	0	.	.	.	.	.	.	.	.	.	5	1	2	2	2	2	2
0925	1	5	8	4	2	2	4	Professional rank	1	2	98	4	5	5	5	2	2	2	98	2	2	1	2	3	1	1	1	1	1	1	1	1	1	1	1	1	1	1	1	1	1	1	4	2	2	3	3	3	3
0926	2	1	5	1	1	1	5	Administrative Rank	2	1	98	4	3	3	1	2	2	2	98	1	3	1	1	1	1	1	.	.	.	.	.	.	0	.	.	.	.	.	.	.	.	.	4	1	2	2	2	2	2
0927	1	1	5	2	1	1	5	Administrative Rank	2	1	98	2	4	4	1	1	2	1	1	1	3	1	2	3	1	1	.	.	.	.	.	.	0	.	.	.	.	.	.	.	.	.	4	1	2	2	2	2	1
0932	1	5	7	1	2	1	2	Trader/Artisans/Business	2	2	98	4	5	5	5	2	2	2	98	1	3	1	2	3	1	1	1	1	1	1	1	1	1	1	1	1	1	1	1	1	1	1	4	1	1	1	1	1	1
0934	1	2	1	1	1	1	1	Professional rank	6	2	98	4	5	5	5	2	2	2	98	2	4	1	2	3	1	1	1	1	1	1	1	1	1	1	1	1	1	1	1	1	1	1	4	1	1	2	2	2	1
0935	2	5	6	2	2	1	3	Professional rank	3	2	98	4	5	5	5	2	2	2	98	1	4	1	2	3	1	1	1	1	1	1	1	1	1	1	1	1	1	1	1	1	1	1	4	1	1	2	2	2	1
0936	2	2	7	1	1	1	1	Administrative Rank	6	1	1	4	5	5	5	2	2	2	98	1	3	1	2	3	1	1	.	.	.	.	.	.	0	.	.	.	.	.	.	.	.	.	4	1	1	2	2	2	1
0939	2	3	9	4	1	1	2	Trader/Artisans/Business	7	2	98	3	4	4	5	2	2	2	98	1	2	1	1	1	1	1	1	1	1	1	1	1	1	1	1	1	1	1	1	1	1	1	1	1	1	2	2	2	1
0940	2	2	8	4	2	1	3	Trader/Artisans/Business	5	1	1	4	5	5	5	2	2	2	98	1	4	1	1	3	1	1	1	1	1	1	1	1	1	1	1	1	1	1	1	1	1	1	1	1	1	2	2	2	1
0941	2	2	9	4	2	1	1	Teaching/Academic Rank	7	2	98	4	5	5	5	2	2	2	98	1	4	1	1	3	1	1	1	1	1	1	1	1	1	1	1	1	1	1	1	1	1	1	4	1	1	2	2	2	2
0942	2	1	6	1	1	1	5	Trader/Artisans/Business	2	1	98	4	5	5	5	2	2	2	98	1	4	1	1	3	1	1	1	1	1	1	1	1	1	1	1	1	1	1	1	1	1	1	4	1	1	2	2	2	2
0949	2	3	6	1	1	2	4	Teaching/Academic Rank	2	1	98	4	5	5	98	2	2	1	98	2	2	1	10	4	1	.	.	.	.	.	.	.	0	.	.	.	.	.	.	.	.	.	4	2	2	2	2	2	1
0951	2	2	8	1	1	2	2	Teaching/Academic Rank	7	2	98	4	3	3	3	2	2	2	98	1	4	1	9	2	1	.	.	1	1	1	1	1	1	1	1	1	1	1	1	1	1	1	1	1	2	2	2	2	1
0952	1	2	8	4	1	2	6	Trader/Artisans/Business	2	1	98	4	5	5	5	2	2	2	98	1	4	1	9	3	1	1	1	1	1	1	1	1	1	1	1	1	1	1	1	1	1	1	1	1	2	2	2	2	1
0955	1	2	7	1	1	1	5	Professional rank	2	1	98	3	4	4	1	2	2	1	98	1	3	1	4	3	0	.	.	.	.	.	.	.	0	.	.	.	.	.	.	.	.	.	4	1	2	1	1	1	1
0956	2	4	6	1	1	1	5	Administrative Rank	2	1	98	2	4	5	98	2	2	2	98	2	2	1	7	2	1	1	.	.	.	.	.	.	0	.	.	.	.	.	.	.	.	.	4	1	1	2	2	2	1
0957	2	3	8	4	2	1	4	Trader/Artisans/Business	2	1	98	3	4	4	5	2	2	2	98	1	2	1	4	3	1	1	1	1	1	1	1	1	1	1	1	1	1	1	1	1	1	1	4	1	2	1	1	1	1
0959	2	3	9	1	1	1	1	Professional rank	6	2	98	2	5	5	5	2	2	2	98	1	1	1	4	3	1	1	1	1	1	1	1	1	1	1	1	1	1	1	1	1	1	1	4	3	3	3	3	3	3
0961	2	3	9	3	2	1	4	Trader/Artisans/Business	5	2	98	4	5	5	5	2	2	2	98	1	3	1	1	3	1	1	1	1	1	1	1	1	1	1	1	1	1	1	1	1	1	1	4	1	1	2	2	2	1
0964	1	3	8	2	2	1	1	Professional rank	3	2	98	4	5	5	5	2	2	2	98	1	4	1	1	3	1	1	1	1	1	1	1	1	1	1	1	1	1	1	1	1	1	1	4	1	1	1	1	1	1
0975	2	3	7	2	2	1	5	Administrative Rank	2	2	98	4	5	5	98	2	2	2	98	1	2	1	2	3	1	1	1	1	1	1	1	1	1	1	1	1	1	1	1	1	1	1	5	1	3	2	2	2	1
0976	2	3	7	2	1	1	1	Administrative Rank	7	2	98	4	5	4	5	2	2	2	98	1	6	1	2	3	0	.	.	.	.	.	.	.	0	.	.	.	.	.	.	.	.	.	5	3	3	3	3	3	3
0977	1	3	8	4	3	1	4	Clergy Rank	2	1	98	3	2	1	1	2	2	1	98	2	2	1	7	2	0	.	.	.	.	.	.	.	0	.	.	.	.	.	.	.	.	.	5	1	3	2	2	2	2
0978	2	3	9	1	1	1	2	Professional rank	6	1	6	4	5	5	5	2	2	2	98	1	3	1	2	1	1	.	1	1	1	1	1	1	1	1	1	1	1	1	1	1	1	1	5	2	2	2	2	2	2
0979	2	3	8	2	1	1	1	Professional rank	2	1	98	4	3	3	4	2	2	2	98	1	2	1	10	4	0	.	1	1	1	1	1	1	1	1	1	1	1	1	1	1	1	1	5	3	2	2	2	2	2
0980	1	3	8	1	2	1	4	Administrative Rank	3	2	98	3	4	4	4	2	2	1	98	1	6	1	6	3	0	.	1	1	1	1	1	1	1	1	1	1	1	1	1	1	1	1	5	2	2	1	1	1	1
0981	1	4	7	1	2	1	6	Administrative Rank	6	1	98	3	3	3	4	2	1	1	98	1	3	1	2	3	0	.	1	1	1	1	1	1	1	1	1	1	1	1	1	1	1	1	5	2	2	2	2	2	1
0982	1	2	8	1	1	1	6	Administrative Rank	2	2	98	3	4	4	4	2	2	2	98	1	3	1	7	2	1	.	1	1	1	1	1	1	1	1	1	1	1	1	1	1	1	1	4	2	1	2	2	2	1
0983	1	3	8	1	2	2	1	Trader/Artisans/Business	7	1	1	3	4	4	4	2	2	2	98	2	2	1	10	4	0	.	.	.	.	.	.	.	0	.	.	.	.	.	.	.	.	.	5	2	2	2	2	2	1
0994	1	3	8	1	2	1	1	Professional rank	5	1	1	2	4	3	4	1	2	1	2	1	3	1	1	2	1	1	1	1	1	1	1	1	1	1	1	1	1	1	1	1	1	1	4	2	1	2	2	2	2
0995	2	1	5	4	1	1	4	Administrative Rank	3	1	98	3	4	2	5	2	2	2	98	1	3	1	6	3	1	.	.	.	.	.	.	.	0	.	.	.	.	.	.	.	.	.	1	2	1	2	2	2	2
0996	2	5	8	1	2	1	6	Administrative Rank	1	1	98	3	4	4	5	1	2	1	1	1	1	1	4	3	1	.	1	1	1	1	1	1	1	1	1	1	1	1	1	1	1	1	5	2	2	2	2	2	2
0997	2	1	5	1	1	1	5	Administrative Rank	3	1	3	4	4	4	98	2	2	2	98	1	1	1	7	2	1	1	.	.	.	.	.	.	0	.	.	.	.	.	.	.	.	.	4	1	2	2	2	2	2
0999	2	3	6	2	3	1	4	Trader/Artisans/Business	6	2	98	3	4	4	4	1	2	2	2	1	3	1	10	4	1	.	1	1	1	1	1	1	1	1	1	1	1	1	1	1	1	1	5	2	2	2	2	2	1
1000	2	2	8	1	1	1	5	Teaching/Academic Rank	3	1	98	4	4	4	4	2	2	2	98	1	2	1	4	3	1	.	1	1	1	1	1	1	1	1	1	1	1	1	1	1	1	1	4	1	2	2	2	2	1
1002	1	3	8	2	1	1	1	Trader/Artisans/Business	7	2	98	3	4	4	5	2	1	1	98	1	6	1	6	3	0	.	.	.	.	.	.	.	0	.	.	.	.	.	.	.	.	.	5	1	2	2	2	2	1
1003	1	1	6	1	1	1	5	Trader/Artisans/Business	3	1	98	3	1	4	98	2	2	1	98	1	2	1	4	3	0	1	.	.	.	.	.	.	0	.	.	.	.	.	.	.	.	.	4	1	1	2	2	2	1
1006	2	3	8	1	2	1	2	Teaching/Academic Rank	7	1	1	3	4	4	4	1	2	1	1	1	1	1	4	2	1	.	1	1	1	1	1	1	1	1	1	1	1	1	1	1	1	1	2	2	2	2	2	2	2
1007	2	4	8	1	2	1	1	Professional rank	5	1	1	3	5	5	5	1	2	1	2	1	3	1	4	3	1	.	1	1	1	1	1	1	1	1	1	1	1	1	1	1	1	1	1	1	2	1	1	1	1
1010	1	4	6	1	2	1	2	Administrative Rank	3	1	98	4	5	5	98	2	2	2	98	1	3	1	4	2	0	.	.	.	.	.	.	.	0	.	.	.	.	.	.	.	.	.	5	3	2	2	2	2	2
1011	1	4	8	4	2	1	2	Administrative Rank	7	1	1	4	5	3	4	2	2	2	98	1	2	1	4	3	1	1	1	1	1	1	1	1	1	1	1	1	1	1	1	1	1	1	1	1	1	2	2	2	2
1012	2	3	8	1	2	1	1	Administrative Rank	6	1	98	4	3	3	98	2	2	2	98	1	4	1	4	3	1	.	1	1	1	1	1	1	1	1	1	1	1	1	1	1	1	1	4	2	2	2	2	2	1
1013	1	3	9	4	1	1	4	Administrative Rank	7	1	98	3	3	3	3	1	2	2	3	1	6	1	10	4	1	.	1	1	1	1	1	1	1	1	1	1	1	1	1	1	1	1	5	1	2	2	2	2	1
1014	1	3	7	1	1	2	3	Administrative Rank	6	1	98	3	3	3	98	1	2	2	2	1	6	1	7	2	1	.	.	.	.	.	.	.	0	.	.	.	.	.	.	.	.	.	5	2	2	2	2	2	1
1015	2	3	7	1	2	1	4	Administrative Rank	7	2	98	3	3	3	4	2	2	2	98	1	3	1	4	3	0	.	.	.	.	.	.	.	0	.	.	.	.	.	.	.	.	.	5	3	3	3	3	3	3
1017	1	4	8	3	3	1	2	Administrative Rank	7	1	98	3	3	3	98	2	2	2	98	1	3	1	4	3	0	.	.	.	.	.	.	.	0	.	.	.	.	.	.	.	.	.	4	1	1	2	2	2	1
1020	1	2	8	1	1	1	3	Administrative Rank	5	1	1	4	3	3	4	2	2	2	98	1	4	1	4	3	1	.	1	1	1	1	1	1	1	1	1	1	1	1	1	1	1	1	4	2	2	2	2	2	2
1025	2	4	2	3	2	2	6	Administrative Rank	5	1	98	4	2	4	2	2	2	2	98	1	3	1	2	3	1	.	1	1	1	1	1	1	1	1	1	1	1	1	1	1	1	1	4	1	2	2	2	2	1
1026	1	2	6	1	1	1	6	Administrative Rank	7	1	98	4	3	3	4	1	2	2	2	1	3	1	2	2	0	.	1	1	1	1	1	1	1	1	1	1	1	1	1	1	1	1	4	2	2	2	2	2	1
1027	2	5	6	1	2	2	4	Trader/Artisans/Business	3	2	98	4	5	5	3	1	2	1	2	1	4	1	7	2	0	.	1	1	1	1	1	1	1	1	1	1	1	1	1	1	1	1	4	1	1	2	2	2	1
1028	2	3	8	3	1	1	4	Trader/Artisans/Business	5	2	98	4	3	3	5	2	2	2	98	1	3	1	10	4	1	.	1	1	1	1	1	1	1	1	1	1	1	1	1	1	1	1	4	2	2	2	2	2	1
1029	1	4	6	3	2	2	5	Teaching/Academic Rank	3	1	98	3	4	4	98	2	2	2	98	1	6	1	2	2	1	.	1	1	1	1	1	1	1	1	1	1	1	1	1	1	1	1	4	1	2	2	2	2	1
1031	2	3	7	1	2	1	4	Teaching/Academic Rank	2	2	98	3	4	3	4	2	2	2	98	1	4	1	2	3	0	.	.	.	.	.	.	.	0	.	.	.	.	.	.	.	.	.	1	3	3	2	2	2	2
1034	1	1	6	2	1	1	5	Administrative Rank	3	2	98	4	4	4	4	2	2	2	98	1	6	1	2	3	1	.	1	1	1	1	1	1	1	1	1	1	1	1	1	1	1	1	5	2	2	3	3	3	3
1035	2	3	7	1	1	1	5	Administrative Rank	6	2	98	3	3	3	4	2	2	2	98	1	4	1	10	4	1	.	1	1	1	1	1	1	1	1	1	1	1	1	1	1	1	1	5	3	3	3	3	3	3
1036	1	5	8	1	2	1	4	Administrative Rank	7	2	98	3	4	4	1	1	2	2	2	1	4	1	2	3	1	.	1	1	1	1	1	1	1	1	1	1	1	1	1	1	1	1	4	2	2	2	2	2	2
1037	1	5	8	2	3	1	4	Administrative Rank	7	2	98	3	3	3	3	2	2	2	98	1	2	1	2	3	1	.	1	1	1	1	1	1	1	1	1	1	1	1	1	1	1	1	5	1	2	2	2	2	1
1040	1	3	8	1	1	1	3	Administrative Rank	6	2	98	3	4	4	4	1	2	1	1	1	2	1	10	4	1	.	1	1	1	1	1	1	1	1	1	1	1	1	1	1	1	1	5	1	2	2	2	2	1
1044	1	3	9	1	1	1	2	Teaching/Academic Rank	7	1	1	3	3	3	3	2	2	2	98	1	4	1	3	3	1	.	1	1	1	1	1	1	1	1	1	1	1	1	1	1	1	1	4	1	1	2	2	2	2
1045	1	2	8	2	1	1	5	Trader/Artisans/Business	7	2	98	3	3	3	4	1	2	1	2	1	2	1	3	3	1	1	1	1	1	1	1	1	1	1	1	1	1	1	1	1	1	1	5	2	2	2	2	2	1
1046	1	2	7	1	1	1	2	Teaching/Academic Rank	2	2	98	3	4	4	3	2	2	2	98	1	3	1	7	2	0	.	.	.	.	.	.	.	0	.	.	.	.	.	.	.	.	.	5	2	2	2	2	2	1
1047	1	2	8	1	1	1	5	Professional rank	3	2	98	4	3	3	4	2	2	2	98	1	4	1	3	3	1	.	1	1	1	1	1	1	1	1	1	1	1	1	1	1	1	1	4	2	2	2	2	2	1
1050	2	4	7	1	2	1	1	Administrative Rank	3	2	98	3	4	4	4	1	1	1	2	1	3	1	10	4	1	.	.	.	.	.	.	.	0	.	.	.	.	.	.	.	.	.	4	1	1	2	2	2	1
1051	2	3	8	4	2	1	1	Administrative Rank	7	1	1	3	3	3	4	2	2	2	98	1	3	1	3	2	1	.	1	1	1	1	1	1	1	1	1	1	1	1	1	1	1	1	4	2	2	2	2	2	1
1052	1	5	6	2	2	1	4	Administrative Rank	7	2	98	3	5	5	2	2	2	2	98	1	3	1	10	4	1	1	.	.	.	.	.	.	0	.	.	.	.	.	.	.	.	.	5	1	1	2	2	2	1
1054	1	3	6	2	1	1	4	Administrative Rank	4	2	98	3	3	5	3	2	2	2	98	1	3	1	10	4	0	.	.	.	.	.	.	.	0	.	.	.	.	.	.	.	.	.	5	2	2	2	2	2	2
1055	1	2	6	2	1	1	5	Administrative Rank	3	2	98	3	3	4	1	2	2	2	98	1	4	1	7	2	0	.	.	.	.	.	.	.	0	.	.	.	.	.	.	.	.	.	5	2	2	2	2	2	1
1057	2	2	8	2	1	1	5	Trader/Artisans/Business	3	2	98	3	4	4	1	2	2	2	98	1	1	1	10	4	1	1	1	1	1	1	1	1	1	1	1	1	1	1	1	1	1	1	1	2	2	2	2	2	2
1059	1	5	6	1	2	1	6	Trader/Artisans/Business	2	2	98	3	4	3	5	2	2	2	98	1	6	1	3	2	0	1	1	1	1	1	1	1	1	1	1	1	1	1	1	1	1	1	1	2	2	2	2	2	1
1060	1	3	8	1	1	1	2	Administrative Rank	6	2	98	4	3	3	3	2	2	2	98	1	3	1	1	3	1	.	1	1	1	1	1	1	1	1	1	1	1	1	1	1	1	1	5	2	2	2	2	2	1
1061	2	2	7	1	1	1	6	Administrative Rank	5	2	98	3	4	4	3	2	2	2	98	2	2	1	10	4	0	1	1	1	1	1	1	1	1	1	1	1	1	1	1	1	1	1	5	2	2	2	2	2	1
1062	1	3	9	1	1	2	2	Administrative Rank	7	2	98	3	3	3	4	1	2	2	2	1	4	1	1	3	1	1	1	1	1	1	1	1	1	1	1	1	1	1	1	1	1	1	2	2	2	2	2	2	2
1063	2	2	8	2	1	1	5	Administrative Rank	3	1	1	4	4	4	5	2	2	2	98	1	2	1	7	2	1	1	1	1	1	1	1	1	1	1	1	1	1	1	1	1	1	1	2	1	2	2	2	2	2
1065	2	1	5	2	1	1	5	Professional rank	3	2	98	3	4	3	4	2	2	2	98	2	2	1	10	4	0	.	.	.	.	.	.	.	0	.	.	.	.	.	.	.	1	1	5	1	2	2	2	2	2
1066	1	4	8	1	1	1	4	Professional rank	7	2	98	4	4	4	5	2	2	2	98	1	3	1	1	3	0	1	.	.	.	.	.	.	0	.	.	.	.	.	.	.	1	1	5	1	1	2	2	2	1
1067	1	4	8	3	4	1	5	Administrative Rank	3	2	98	3	2	1	1	2	2	1	98	1	2	1	1	2	1	.	1	1	1	1	1	1	1	1	1	1	1	1	1	1	1	1	2	1	2	2	2	2	1
1069	1	3	8	1	1	1	6	Administrative Rank	7	2	98	3	3	4	2	2	2	2	98	1	2	1	7	2	1	1	1	1	1	1	1	1	1	1	1	1	1	1	1	1	1	1	2	1	2	2	2	2	1
1070	2	2	8	1	1	2	5	Trader/Artisans/Business	3	2	98	3	5	5	4	2	2	2	98	1	4	1	1	2	1	1	1	1	1	1	1	1	1	1	1	1	1	1	1	1	1	1	5	2	2	2	2	2	2
1071	2	5	8	4	2	1	1	Trader/Artisans/Business	7	1	1	2	3	3	2	1	2	1	2	1	3	1	1	3	1	1	1	1	1	1	1	1	1	1	1	1	1	1	1	1	1	1	4	2	2	2	2	2	1
1073	2	5	6	4	2	2	4	Trader/Artisans/Business	3	2	98	3	3	3	5	2	2	2	98	1	3	1	10	4	0	.	.	.	.	.	.	.	0	.	.	.	.	.	.	.	1	1	5	2	2	2	2	2	2
1074	1	6	3	1	2	2	4	Trader/Artisans/Business	3	2	98	2	2	3	3	2	2	2	98	1	3	1	10	4	0	.	.	.	.	.	.	.	0	.	.	.	.	.	.	.	1	1	4	2	1	2	2	2	1
1075	2	2	6	1	1	2	2	Trader/Artisans/Business	3	2	98	3	4	4	5	2	2	2	98	1	6	1	1	3	1	.	1	1	1	1	1	1	1	1	1	1	1	1	1	1	1	1	5	2	2	1	1	1	1
1076	1	2	5	1	1	1	1	Trader/Artisans/Business	1	2	98	4	5	5	4	2	2	1	98	2	6	1	1	2	0	1	.	.	.	.	.	.	0	.	.	.	.	.	.	.	1	1	5	2	1	2	2	2	2
1077	2	3	7	2	1	1	5	Trader/Artisans/Business	2	2	98	3	3	3	4	2	2	2	98	1	3	1	10	4	1	1	1	1	1	1	1	1	1	1	1	1	1	1	1	1	1	1	5	1	2	2	2	2	1
1079	2	4	7	1	2	1	1	Administrative Rank	4	2	98	3	4	4	4	1	2	2	3	1	4	1	10	4	.	.	1	1	1	1	1	1	1	1	1	1	1	1	1	1	1	1	4	2	2	2	2	2	1
1080	1	2	7	2	1	1	5	Professional rank	2	2	98	3	4	5	5	2	2	2	98	1	3	1	4	3	.	1	1	1	1	1	1	1	1	1	1	1	1	1	1	1	1	1	5	2	2	2	2	2	1
1081	1	2	7	1	1	2	2	Professional rank	5	2	98	3	3	3	4	2	2	2	98	1	3	1	6	3	.	.	1	1	1	1	1	1	1	1	1	1	1	1	1	1	1	1	4	2	2	2	2	2	1
1082	1	4	9	3	2	1	5	Professional rank	3	2	98	4	3	2	3	2	2	2	98	2	2	1	7	2	.	.	.	.	.	.	.	.	0	.	.	.	.	.	.	.	.	.	5	3	3	3	3	3	3
1084	1	4	7	1	1	1	6	Administrative Rank	4	1	1	3	3	3	4	2	1	2	98	1	1	1	10	4	0	1	.	.	.	.	.	.	0	.	.	.	.	.	.	.	1	1	1	2	1	2	2	2	2
1085	1	3	10	3	1	1	5	Administrative Rank	3	2	98	3	4	4	4	2	2	2	98	1	3	1	1	1	1	1	1	1	1	1	1	1	1	1	1	1	1	1	1	1	1	1	5	2	2	2	2	2	2
1086	1	1	6	1	1	1	5	Administrative Rank	3	1	1	3	4	5	1	1	2	2	3	1	4	1	6	3	1	.	.	.	.	.	.	.	0	.	.	.	.	.	.	.	.	.	5	2	2	2	2	2	1
1087	1	4	8	1	2	1	6	Trader/Artisans/Business	2	1	1	3	4	5	4	1	2	2	2	1	2	1	4	1	1	1	1	1	1	1	1	1	1	1	1	1	1	1	1	1	1	1	5	1	2	2	2	2	1
1088	1	2	8	1	1	2	4	Trader/Artisans/Business	7	2	98	4	5	4	3	1	1	2	2	1	1	1	6	3	0	.	.	.	.	.	.	.	0	.	.	.	.	.	.	.	1	1	5	2	1	2	2	2	2
1089	1	4	8	4	1	1	1	Trader/Artisans/Business	3	1	98	3	5	4	5	2	2	2	98	1	4	1	4	3	1	1	1	1	1	1	1	1	1	1	1	1	1	1	1	1	1	1	5	1	1	2	2	2	2
1090	1	4	6	1	1	1	6	Trader/Artisans/Business	2	2	98	4	5	4	4	1	2	2	2	1	2	1	10	4	1	.	1	1	1	1	1	1	1	1	1	1	1	1	1	1	1	1	5	2	2	3	3	3	3
1091	1	2	6	1	1	1	3	Trader/Artisans/Business	3	2	98	4	4	4	4	2	2	2	98	1	3	1	10	4	0	.	.	.	.	.	.	.	0	.	.	.	.	.	.	.	1	1	4	2	2	2	2	2	2
1092	2	1	6	1	1	1	4	Professional rank	5	2	98	3	5	3	4	2	2	2	98	1	3	1	7	2	1	1	1	1	1	1	1	1	1	1	1	1	1	1	1	1	1	1	5	1	2	2	2	2	1
1093	2	3	6	2	1	1	5	Professional rank	3	2	98	3	5	4	4	2	2	2	98	1	3	1	4	3	1	.	1	1	1	1	1	1	1	1	1	1	1	1	1	1	1	1	5	1	1	2	2	2	2
1094	2	1	6	1	1	1	5	Administrative Rank	3	2	98	3	4	5	5	2	2	2	98	1	1	1	10	4	1	1	.	.	.	.	.	.	0	.	.	.	.	.	.	.	.	.	5	1	1	2	2	2	2
1095	2	4	7	3	1	1	5	Administrative Rank	1	1	1	3	5	5	4	2	2	2	98	1	3	1	7	2	0	.	.	.	.	.	.	.	0	.	.	.	.	.	.	.	.	.	5	2	3	2	2	2	2
1096	2	2	8	1	1	1	5	Administrative Rank	3	1	1	2	4	4	4	2	2	2	98	1	3	1	4	2	1	.	1	1	1	1	1	1	1	1	1	1	1	1	1	1	1	1	4	3	3	2	2	2	2
1097	2	2	6	1	1	2	3	Teaching/Academic Rank	3	2	98	3	3	3	3	2	2	2	98	1	3	1	4	3	1	.	1	1	1	1	1	1	1	1	1	1	1	1	1	1	1	1	4	1	1	2	2	2	1
1098	2	5	3	2	2	1	6	Teaching/Academic Rank	3	2	98	2	3	3	1	1	2	1	2	1	3	1	7	2	1	.	1	1	1	1	1	1	1	1	1	1	1	1	1	1	1	1	5	2	2	2	2	2	1
1099	2	3	6	1	2	1	6	Teaching/Academic Rank	6	2	98	3	3	3	4	2	2	2	98	1	2	1	10	4	1	.	.	.	.	.	.	.	0	.	.	.	.	.	.	1	.	.	5	2	2	2	2	2	1
1101	1	3	7	2	1	1	4	Trader/Artisans/Business	6	2	98	3	4	4	3	1	2	1	2	1	2	1	4	3	1	.	1	1	1	1	1	1	1	1	1	1	1	1	1	1	1	1	5	2	2	2	2	2	1
1102	2	2	9	2	1	1	5	Trader/Artisans/Business	3	2	98	3	5	5	4	2	2	2	98	1	6	1	7	2	1	1	.	.	.	.	.	.	0	.	.	.	.	.	.	.	.	1	5	1	1	2	2	2	1
1103	2	2	6	1	1	2	5	Teaching/Academic Rank	3	2	98	3	5	4	4	2	2	2	98	1	2	1	7	2	1	1	1	1	1	1	1	1	1	1	1	1	1	1	1	1	1	1	1	2	1	2	2	2	1
1104	1	1	6	2	1	1	5	Trader/Artisans/Business	3	2	98	3	3	2	4	1	2	2	2	1	2	1	4	3	1	1	1	1	1	1	1	1	1	1	1	1	1	1	1	1	1	1	1	2	1	2	2	2	1
1105	2	2	9	2	1	1	5	Teaching/Academic Rank	3	2	98	4	3	2	1	2	2	2	98	1	2	1	7	2	1	1	1	1	1	1	1	1	1	1	1	1	1	1	1	1	1	1	2	1	2	2	2	2	1
1106	2	2	8	2	1	1	5	Trader/Artisans/Business	3	2	98	3	4	4	3	1	2	2	2	1	1	1	7	2	1	.	.	.	.	.	.	.	0	.	.	1	.	.	.	.	.	.	1	2	1	2	2	2	1
1108	1	4	1	3	2	2	3	Trader/Artisans/Business	3	2	98	3	3	4	2	1	1	1	1	1	3	1	4	2	1	.	.	.	.	.	.	.	0	.	.	1	.	.	.	.	.	.	4	1	2	1	1	1	1
1109	2	1	5	1	1	1	5	Teaching/Academic Rank	3	2	98	4	5	5	1	2	2	2	98	1	6	1	10	4	0	.	.	.	.	.	.	.	0	.	.	1	.	.	.	.	.	.	5	2	2	2	2	2	2
1110	2	2	6	1	1	1	3	Trader/Artisans/Business	3	2	98	4	5	4	2	2	2	1	98	1	2	1	10	4	0	.	.	.	.	.	.	.	0	.	.	1	1	1	.	.	.	.	4	2	2	2	2	2	1
1111	1	3	8	1	1	1	2	Teaching/Academic Rank	2	1	1	3	4	4	4	2	2	2	98	1	2	1	4	3	0	.	.	.	.	.	.	.	0	.	.	1	.	1	.	.	.	.	5	1	1	2	2	2	1
1112	1	2	6	1	1	1	5	Trader/Artisans/Business	3	2	98	3	5	4	4	2	2	2	98	1	6	1	10	4	1	.	.	.	.	.	.	.	0	.	.	1	.	1	.	.	.	.	1	3	3	2	2	2	1
1113	1	2	6	1	1	1	5	Professional rank	3	2	98	4	5	5	2	2	2	2	98	2	2	1	10	4	1	.	.	.	.	.	.	.	0	.	.	.	.	1	.	.	.	.	5	1	2	2	2	2	1
1115	2	5	3	2	2	1	6	Trader/Artisans/Business	3	2	98	1	4	4	3	2	2	1	98	1	3	1	10	4	1	.	1	1	1	1	1	1	1	1	1	1	1	1	1	1	1	1	4	2	2	2	2	2	2
1117	1	3	7	3	1	1	2	Professional rank	7	2	98	4	5	5	5	2	2	2	98	1	4	1	4	3	0	.	.	.	.	.	.	.	0	.	.	.	.	1	.	.	.	.	5	2	2	2	2	2	2
1118	1	3	8	4	1	1	2	Administrative Rank	6	1	1	3	4	4	4	2	2	2	98	1	4	1	10	4	0	.	1	1	1	1	1	1	1	1	1	1	1	1	1	1	1	1	3	2	2	2	2	2	2
1119	2	1	5	1	1	1	5	Trader/Artisans/Business	2	2	3	3	4	4	5	2	2	2	98	1	1	1	7	2	1	.	.	.	.	.	.	.	0	.	.	.	.	1	.	.	.	.	5	1	1	2	2	2	2
1120	2	4	8	4	2	1	1	Teaching/Academic Rank	4	2	98	2	4	3	3	2	1	1	98	1	2	1	5	2	1	1	1	1	1	1	1	1	1	1	1	1	1	1	1	1	1	1	4	1	2	2	2	2	2
1121	1	1	5	4	1	1	5	Professional rank	3	2	98	3	4	4	4	2	2	2	98	1	1	1	10	4	0	.	.	.	.	.	.	.	0	.	.	.	.	1	.	.	.	.	5	2	1	2	2	2	2
1122	1	3	8	1	2	1	2	Professional rank	6	2	1	4	5	4	5	2	2	2	98	1	3	1	5	3	0	.	.	.	.	.	.	.	0	.	.	.	.	1	.	.	.	.	5	1	2	2	2	2	2
1124	1	2	8	2	1	1	5	Professional rank	3	1	1	3	4	3	4	2	2	1	98	1	6	1	5	3	0	.	.	.	.	.	.	.	0	.	.	1	.	.	.	.	.	.	5	1	2	2	2	2	2
1125	2	3	8	1	2	1	6	Professional rank	4	2	98	3	4	5	5	1	2	2	3	1	4	1	5	3	1	1	1	1	1	1	1	1	1	1	1	1	1	1	1	1	1	1	4	2	3	2	2	2	2
1133	1	5	3	1	2	2	1	Trader/Artisans/Business	5	2	98	3	3	5	5	2	2	2	98	1	6	1	10	4	0	.	.	.	.	.	.	.	0	.	.	.	1	.	.	.	.	.	5	2	2	2	2	2	2
1137	2	5	5	2	2	1	6	Administrative Rank	7	2	98	4	3	3	5	2	2	2	98	1	6	1	10	4	0	.	.	.	.	.	.	.	0	.	.	.	.	.	.	.	.	.	5	1	1	3	3	3	3
1138	1	4	5	1	2	1	3	Administrative Rank	7	1	1	3	3	5	4	2	2	2	98	1	6	1	7	2	1	1	1	1	1	1	1	1	1	1	1	1	1	1	1	1	1	1	1	1	2	1	1	1	1
1139	2	2	6	2	1	1	5	Administrative Rank	1	2	98	4	4	5	4	1	2	2	2	1	1	1	7	2	1	1	1	1	1	1	1	1	1	1	1	1	1	1	1	1	1	1	3	1	2	2	2	2	2
1140	2	3	8	1	2	1	5	Clergy Rank	1	1	1	4	5	5	5	2	2	2	98	1	4	1	4	3	0	1	1	1	1	1	1	1	1	1	1	1	1	1	1	1	1	1	5	1	2	1	1	1	1
1144	1	3	6	2	1	1	2	Administrative Rank	7	1	98	3	3	4	5	2	2	2	98	1	3	1	7	2	1	.	1	1	1	1	1	1	1	1	1	1	1	1	1	1	1	1	2	1	1	2	2	2	2
1145	2	3	8	1	1	1	5	Administrative Rank	4	1	1	3	3	3	5	2	2	2	98	1	4	1	10	4	1	1	1	1	1	1	1	1	1	1	1	1	1	1	1	1	1	1	4	2	1	1	1	1	1
1146	1	3	8	1	1	2	5	Trader/Artisans/Business	3	1	3	3	4	4	5	2	2	2	98	1	6	1	10	4	0	1	1	1	1	1	1	1	1	1	1	1	1	1	1	1	1	1	1	2	2	2	2	2	2
1152	1	2	6	2	1	1	4	Teaching/Academic Rank	1	2	98	3	4	4	3	2	2	2	98	1	1	1	10	4	1	1	.	.	.	.	.	.	0	.	.	.	.	.	.	.	.	.	1	1	1	2	2	2	2
1153	2	2	6	1	1	2	5	Trader/Artisans/Business	1	1	1	3	3	3	5	2	2	2	98	1	2	1	10	4	0	1	1	1	1	1	1	1	1	1	1	1	1	1	1	1	1	1	5	2	2	1	1	1	1
1158	1	3	6	1	1	1	4	Administrative Rank	1	1	1	3	4	5	3	1	1	2	2	2	2	1	10	4	0	.	.	.	.	.	.	.	0	.	.	.	1	.	.	.	.	.	4	2	2	2	2	2	2
1159	1	4	6	1	2	2	4	Administrative Rank	4	1	1	3	3	4	4	2	2	2	98	1	3	1	10	4	0	.	.	.	.	.	.	.	0	.	.	.	1	.	.	.	.	.	5	2	2	2	2	2	2
1161	2	1	6	1	1	1	5	Trader/Artisans/Business	1	2	98	3	3	3	3	2	2	1	98	1	4	1	10	4	1	1	1	1	1	1	1	1	1	1	1	1	1	1	1	1	1	1	5	1	1	1	1	1	1
1162	1	3	6	2	2	1	6	Trader/Artisans/Business	7	1	1	3	3	3	3	1	1	1	2	1	4	1	10	4	0	.	.	.	.	.	.	.	0	.	.	.	.	.	.	.	.	.	5	2	2	1	1	1	1
1170	2	5	2	1	2	1	3	Professional rank	5	1	3	3	2	3	3	1	1	1	2	1	2	1	10	4	1	1	1	1	1	1	1	1	1	1	1	1	1	1	1	1	1	1	4	2	2	2	2	2	2
1171	1	4	6	1	1	1	3	Professional rank	2	1	1	4	5	5	1	1	2	2	2	1	3	1	8	3	1	.	1	1	1	1	1	1	1	1	1	1	1	1	1	1	1	1	4	1	2	1	1	1	1
1172	2	1	6	1	2	1	5	Administrative Rank	3	2	98	4	5	5	3	1	1	1	3	1	1	1	6	3	1	.	.	.	.	.	.	.	0	.	.	.	.	.	.	.	.	.	5	2	1	2	2	2	2
1173	1	2	6	3	3	2	3	Administrative Rank	2	2	98	3	4	4	1	2	2	1	98	1	3	1	10	4	1	.	.	.	.	.	.	.	0	.	.	.	.	.	.	.	.	.	2	1	2	2	2	2	2
1176	2	1	5	1	1	1	5	Administrative Rank	1	2	98	4	5	5	1	2	2	1	98	1	1	1	10	4	0	1	1	1	1	1	1	1	1	1	1	1	1	1	1	1	1	1	4	2	1	2	2	2	2
1177	2	1	5	1	1	1	5	Administrative Rank	1	2	98	3	5	4	2	2	2	2	98	1	3	1	7	2	0	.	1	1	1	1	1	1	1	1	1	1	1	1	1	1	1	1	2	1	2	2	2	2	2
1179	2	4	9	1	1	1	1	Administrative Rank	7	1	1	4	5	3	2	2	2	2	98	1	3	1	1	1	0	.	.	.	.	.	.	.	0	.	.	.	.	.	.	.	.	.	5	1	2	2	2	2	2
1181	1	1	6	1	1	1	5	Administrative Rank	1	2	98	3	3	2	2	2	2	2	98	2	2	1	8	3	0	.	.	.	.	.	.	.	0	.	.	.	.	.	.	.	.	.	5	2	2	2	2	2	2
1182	1	2	6	1	1	1	5	Administrative Rank	1	2	98	3	4	4	3	2	2	2	98	1	2	1	10	4	0	.	.	.	.	.	.	.	0	.	.	.	.	.	.	.	.	.	5	2	2	2	2	2	2
1183	1	2	7	1	1	2	3	Administrative Rank	2	2	98	3	4	4	1	2	2	2	98	1	1	1	6	3	1	1	.	.	.	.	.	.	0	.	.	.	.	.	.	.	.	.	4	1	1	1	1	1	1
1184	1	1	7	2	1	1	5	Administrative Rank	1	2	98	3	3	3	4	2	2	2	98	1	6	1	7	2	0	.	.	.	.	.	.	.	0	.	.	1	.	.	.	.	.	.	4	1	2	2	2	2	2
1186	2	1	6	2	1	1	5	Administrative Rank	1	2	98	3	3	4	4	2	2	2	98	1	2	1	7	2	0	1	1	1	1	1	1	1	1	1	1	1	1	1	1	1	1	1	4	1	1	2	2	2	2
1188	2	2	6	2	1	1	4	Administrative Rank	3	2	98	4	5	4	3	2	2	1	98	1	4	1	9	3	1	1	1	1	1	1	1	1	1	.	1	1	1	1	1	1	1	1	5	1	1	1	1	1	1
1189	1	3	8	1	1	1	2	Administrative Rank	7	1	1	3	4	4	5	2	2	2	98	1	1	1	9	3	1	.	1	1	1	1	1	1	1	.	1	1	1	1	1	1	1	1	5	2	2	1	1	1	1
1190	2	4	8	1	2	1	4	Administrative Rank	4	2	98	4	5	5	5	2	2	2	98	1	3	1	9	3	0	.	.	.	.	.	.	.	0	.	.	.	1	.	.	.	.	.	4	2	2	2	2	2	2
1194	1	1	7	1	1	1	5	Teaching/Academic Rank	3	2	98	3	5	4	3	2	2	1	98	1	6	1	4	3	0	1	1	1	1	1	1	1	1	1	1	1	1	1	1	1	1	1	5	2	1	2	2	2	2
1200	1	3	8	1	1	2	5	Administrative Rank	3	2	98	4	4	2	4	1	2	2	2	1	4	1	7	2	0	1	1	1	1	1	1	1	1	1	1	1	1	1	1	1	1	1	1	2	2	2	2	2	2
1201	1	4	7	3	1	1	5	Administrative Rank	3	2	98	3	3	4	5	1	2	2	2	1	3	1	7	2	0	.	.	.	.	.	.	.	0	.	.	.	1	.	.	.	.	.	4	2	3	3	3	3	3
1202	2	4	6	1	1	2	3	Administrative Rank	3	2	98	3	5	5	5	2	2	2	98	1	4	1	4	2	1	1	1	1	1	1	1	1	1	1	1	1	1	1	1	1	1	1	4	1	1	2	2	2	2
1203	1	4	6	1	2	1	4	Administrative Rank	7	2	98	3	4	4	5	2	2	2	98	1	4	1	7	2	1	1	1	1	1	1	1	1	1	.	1	1	1	1	1	1	1	1	1	2	2	2	2	2	2
1204	1	4	8	1	1	1	5	Administrative Rank	3	2	98	3	4	4	5	1	2	2	2	1	3	1	4	3	0	1	1	1	1	1	1	1	1	1	1	1	1	1	1	1	1	1	4	2	2	2	2	2	2
1205	1	4	6	2	2	1	4	Administrative Rank	7	2	98	2	3	3	3	2	2	2	98	1	4	1	4	3	1	1	1	1	1	1	1	1	1	1	1	1	1	1	1	1	1	1	4	1	1	2	2	2	2
1206	1	4	6	2	2	1	4	Administrative Rank	7	2	98	2	3	3	3	2	2	2	98	1	4	1	4	3	1	1	1	1	1	1	1	1	1	1	1	1	1	1	1	1	1	1	4	1	1	2	2	2	2
1207	1	3	8	1	1	2	6	Trader/Artisans/Business	6	2	98	2	3	3	3	2	2	2	98	1	1	1	1	1	1	.	1	1	1	1	1	1	1	1	1	1	1	1	1	1	1	1	5	1	2	2	2	2	2
1208	1	4	8	1	1	1	5	Trader/Artisans/Business	3	2	98	3	4	4	5	1	2	2	2	1	3	1	6	3	0	1	1	1	1	1	1	1	1	1	1	1	1	1	1	1	1	1	1	2	2	2	2	2	2
1209	2	4	7	2	2	1	2	Teaching/Academic Rank	7	2	98	3	4	4	4	1	2	2	2	1	4	1	4	3	1	.	1	1	1	1	1	1	1	1	1	1	1	1	1	1	1	1	1	1	1	2	2	2	2
1210	1	4	7	2	2	1	2	Trader/Artisans/Business	7	2	98	2	3	3	3	2	2	2	98	1	4	1	4	3	1	1	1	1	1	1	1	1	1	1	1	1	1	1	1	1	1	1	1	1	1	2	2	2	2
1212	2	4	8	1	2	2	2	Professional rank	7	2	98	3	4	4	4	2	2	2	98	1	4	1	2	3	0	.	1	1	1	1	1	1	1	.	1	1	1	1	1	1	1	1	4	1	2	2	2	2	2
1213	1	1	5	1	1	1	5	Professional rank	3	2	98	3	3	3	2	2	2	2	98	1	3	1	2	3	1	.	.	.	.	.	.	.	0	.	1	1	.	.	.	.	.	.	2	1	1	2	2	2	2
1214	1	4	7	3	1	1	5	Administrative Rank	3	2	98	3	3	4	5	1	2	2	2	1	3	1	7	2	0	.	.	.	.	.	.	.	0	.	.	.	.	.	.	.	.	.	4	2	3	3	3	3	3
1215	2	4	7	2	2	1	4	Administrative Rank	7	2	98	3	4	4	4	1	2	2	2	1	4	1	2	3	0	1	1	1	1	1	1	1	1	1	1	1	1	1	1	1	1	1	4	1	1	2	2	2	2
1216	1	4	3	1	2	3	5	Administrative Rank	7	2	98	2	4	4	4	2	1	2	2	1	6	1	10	4	0	.	.	.	.	.	.	.	0	.	.	.	.	.	.	.	.	.	5	2	2	2	2	2	2
1217	1	3	8	1	1	1	6	Administrative Rank	5	2	98	2	3	3	3	2	2	2	98	1	1	1	1	1	1	1	1	1	1	1	1	1	1	1	1	1	1	1	1	1	1	1	5	1	2	2	2	2	2
1219	1	4	9	4	4	1	5	Administrative Rank	3	2	98	3	5	5	5	2	2	2	98	1	3	1	2	2	0	1	1	1	1	1	1	1	1	1	1	1	1	1	1	1	1	1	1	2	2	2	2	2	2
1221	1	3	8	1	2	2	5	Administrative Rank	3	2	98	4	4	2	4	1	2	2	2	1	4	1	7	2	0	1	1	1	1	1	1	1	1	1	1	1	1	1	1	1	1	1	1	2	2	2	2	2	2
1222	2	4	7	1	2	1	6	Others	7	1	1	3	4	4	5	2	2	2	98	1	4	1	7	2	0	1	1	1	1	1	1	1	1	1	1	1	1	1	1	1	1	1	4	1	1	2	2	2	2
1223	1	3	8	1	2	2	5	Trader/Artisans/Business	3	2	98	4	4	2	4	1	2	2	2	1	4	1	7	2	0	1	1	1	1	1	1	1	1	1	1	1	1	1	1	1	1	1	2	2	2	2	2	2	2
1224	1	4	6	2	2	1	2	Trader/Artisans/Business	7	2	98	2	3	3	3	2	2	2	98	1	4	1	6	3	1	1	1	1	1	1	1	1	1	1	1	1	1	1	1	1	1	1	1	1	1	2	2	2	2
1225	1	3	8	1	2	2	5	Administrative Rank	3	2	98	4	4	2	4	1	2	2	2	1	4	1	7	2	0	1	1	1	1	1	1	1	1	1	1	1	1	1	1	1	1	1	1	2	2	2	2	2	2
1227	1	2	8	1	1	1	5	Administrative Rank	3	2	98	4	5	2	4	1	2	2	2	1	4	1	7	2	0	1	1	1	1	1	1	1	1	1	1	1	1	1	1	1	1	1	4	2	2	2	2	2	2
1228	2	4	7	1	2	2	1	Administrative Rank	7	1	98	3	4	4	4	1	2	2	3	1	4	1	6	3	1	.	1	1	1	1	1	1	1	1	1	1	1	1	1	1	1	1	4	1	1	2	2	2	2
1229	1	2	8	2	1	1	1	Clergy Rank	1	2	98	4	5	5	2	2	2	2	98	1	2	1	10	4	0	.	.	.	.	.	.	.	0	.	.	.	.	.	.	.	.	.	4	1	2	2	2	2	2
1231	2	3	6	2	2	1	4	Professional rank	6	2	98	3	4	4	4	2	2	2	98	1	1	1	10	4	0	.	1	1	1	1	1	1	1	1	1	1	1	1	1	1	1	1	5	1	2	2	2	2	2
1233	1	4	8	4	1	2	5	Administrative Rank	2	2	98	3	4	3	4	2	2	2	98	1	1	1	6	3	1	.	1	1	1	1	1	1	1	1	1	1	1	1	1	1	1	1	4	1	2	2	2	2	2
1234	2	2	9	1	1	2	5	Administrative Rank	1	2	98	3	4	3	4	2	2	2	98	1	4	1	7	2	0	1	1	1	1	1	1	1	1	1	1	1	1	1	1	1	1	1	1	2	2	2	2	2	2
1235	1	4	8	1	2	1	1	Trader/Artisans/Business	7	2	98	3	4	4	4	2	2	2	98	1	4	1	7	2	0	.	1	1	1	1	1	1	1	1	1	1	1	1	1	1	1	1	2	1	1	2	2	2	2
1236	1	1	6	3	1	2	5	Trader/Artisans/Business	1	2	98	4	4	3	4	2	2	2	98	1	4	1	7	2	0	1	1	1	1	1	1	1	1	1	1	1	1	1	1	1	1	1	5	3	3	3	3	3	3
1238	2	5	8	2	2	1	4	Trader/Artisans/Business	5	1	6	3	5	4	3	2	2	1	98	1	2	1	6	3	0	1	1	1	1	1	1	1	1	1	1	1	1	1	1	1	1	1	2	1	1	2	2	2	2
1239	1	2	6	1	1	1	4	Trader/Artisans/Business	1	1	1	3	4	5	3	2	2	2	98	1	6	1	10	4	0	.	.	.	.	.	.	.	0	.	.	.	1	.	.	.	.	.	4	2	2	2	2	2	2
1240	2	1	6	2	1	1	5	Trader/Artisans/Business	1	2	98	3	5	4	3	2	2	2	98	1	1	1	7	2	1	1	1	1	1	1	1	1	1	1	1	1	1	1	1	1	1	1	4	1	1	2	2	2	2
1245	2	1	5	1	1	2	5	Professional rank	1	2	98	3	5	5	1	1	2	1	2	2	3	1	10	4	0	1	.	.	.	.	.	.	0	.	.	.	1	.	.	.	.	.	1	2	1	2	2	2	2
1248	2	1	5	1	1	1	5	Professional rank	3	2	98	3	4	5	2	2	2	2	98	1	4	1	10	4	0	.	.	.	.	.	.	.	0	.	.	.	.	.	.	.	.	.	4	2	1	1	1	1	1
1249	2	1	6	1	1	1	5	Administrative Rank	7	2	98	3	4	5	2	2	2	1	98	2	2	1	7	2	0	.	1	1	1	1	1	1	1	1	1	1	1	1	1	1	1	1	4	1	2	2	2	2	2
1250	2	1	5	1	1	1	5	Administrative Rank	1	2	98	4	5	4	2	2	2	1	98	1	2	1	7	2	1	1	1	1	1	1	1	1	1	1	1	1	1	1	1	1	1	1	2	1	2	2	2	2	2
1251	2	1	5	2	1	1	5	Administrative Rank	1	2	98	3	4	2	4	2	2	2	98	1	3	1	6	3	1	1	.	.	.	.	.	.	0	.	.	.	.	.	.	.	.	.	1	1	1	2	2	2	2
1255	1	4	8	1	2	2	3	Trader/Artisans/Business	6	1	2	2	1	4	4	1	2	2	3	1	3	1	7	2	0	1	1	1	1	1	1	1	1	1	1	1	1	1	1	1	1	1	5	2	2	2	2	2	2
1256	2	3	7	1	1	1	1	Trader/Artisans/Business	2	2	98	3	4	3	1	1	2	1	2	1	2	1	7	2	0	.	.	.	.	.	.	.	0	.	.	.	.	.	.	.	.	.	2	1	1	2	2	2	2
1257	1	2	7	1	1	1	3	Professional rank	1	1	1	3	4	3	5	1	2	2	2	1	1	1	7	2	0	.	.	.	.	.	.	.	0	.	.	.	.	.	.	.	.	.	4	2	1	2	2	2	2
1264	2	4	6	1	4	1	4	Teaching/Academic Rank	7	2	98	3	4	4	4	2	2	2	98	1	3	1	10	4	0	1	1	1	1	1	1	1	1	1	1	1	1	1	1	1	1	1	2	1	2	2	2	2	2
1265	2	2	8	1	2	2	5	Trader/Artisans/Business	4	1	1	4	5	5	5	2	2	2	98	1	4	1	6	3	1	1	1	1	1	1	1	1	1	1	1	1	1	1	1	1	1	1	5	1	1	1	1	1	1
1266	1	3	6	1	2	1	2	Trader/Artisans/Business	7	2	98	3	4	5	4	2	2	2	98	1	3	1	7	2	1	.	1	1	1	1	1	1	1	1	1	1	1	1	1	1	1	1	1	1	1	2	2	2	2
1268	2	2	8	1	1	2	5	Teaching/Academic Rank	1	1	3	4	4	5	5	2	2	2	98	1	4	1	6	3	1	1	1	1	1	1	1	1	1	1	1	1	1	1	1	1	1	1	2	1	1	2	2	2	2
1269	1	6	7	1	2	2	6	Trader/Artisans/Business	2	1	3	2	4	4	3	2	2	2	98	1	3	1	6	3	1	.	1	1	1	1	1	1	1	1	1	1	1	1	1	1	1	1	4	1	2	2	2	2	2
1270	1	5	8	4	2	1	4	Teaching/Academic Rank	5	2	98	3	4	4	3	2	1	2	98	1	4	1	1	1	1	1	1	1	1	1	1	1	1	1	1	1	1	1	1	1	1	1	5	1	1	1	1	1	1
1271	1	4	3	1	2	1	3	Trader/Artisans/Business	2	1	1	3	4	5	4	2	2	2	98	1	3	1	7	2	1	.	1	1	1	1	1	1	1	1	1	1	1	1	1	1	1	1	1	1	1	2	2	2	2
1272	2	5	2	1	5	2	3	Teaching/Academic Rank	5	1	1	3	3	4	4	1	2	2	2	1	6	1	10	4	1	1	1	1	1	1	1	1	1	1	1	1	1	1	1	1	1	1	4	1	2	2	2	2	2
1276	2	5	7	2	2	1	3	Teaching/Academic Rank	7	2	98	3	4	4	4	1	2	2	2	1	4	1	6	3	1	.	1	1	1	1	1	1	1	1	1	1	1	1	1	1	1	1	4	1	1	2	2	2	2
1277	2	5	8	2	2	1	2	Trader/Artisans/Business	3	2	98	4	4	5	4	1	2	2	2	1	4	1	7	2	0	.	1	1	1	1	1	1	1	1	1	1	1	1	1	1	1	1	5	1	2	2	2	2	2
1278	1	3	8	1	1	1	1	Professional rank	7	1	2	3	3	4	1	1	2	2	2	2	3	1	10	4	0	1	1	1	1	1	1	1	1	1	1	1	1	1	1	1	1	1	3	3	3	2	2	2	2
1279	1	4	8	1	2	2	2	Administrative Rank	7	2	98	3	5	4	4	1	2	2	2	1	4	1	6	3	0	.	1	1	1	1	1	1	1	1	1	1	1	1	1	1	1	1	4	1	2	2	2	2	2
1280	1	5	7	1	2	1	5	Trader/Artisans/Business	3	2	98	3	4	4	4	1	2	2	1	1	4	1	7	2	0	1	1	1	1	1	1	1	1	1	1	1	1	1	1	1	1	1	5	1	2	2	2	2	2
1281	2	2	7	2	1	1	1	Teaching/Academic Rank	4	2	98	3	4	4	4	2	2	2	98	1	3	1	6	3	0	.	.	.	.	.	.	.	0	.	1	.	.	.	.	.	.	.	1	2	2	2	2	2	2
1282	2	3	8	2	2	1	1	Professional rank	3	2	98	3	4	5	4	1	2	2	2	1	4	1	7	2	0	.	1	1	1	1	1	1	1	1	1	1	1	1	1	1	1	1	2	1	2	2	2	2	2
1283	1	3	9	1	4	1	5	Administrative Rank	6	2	98	3	4	4	4	2	2	2	98	1	4	1	6	3	1	1	1	1	1	1	1	1	1	1	1	1	1	1	1	1	1	1	1	1	1	2	2	2	2
1284	2	2	9	2	2	1	2	Trader/Artisans/Business	7	2	98	4	4	3	4	2	2	2	98	1	4	1	7	2	0	1	1	1	1	1	1	1	1	1	1	1	1	1	1	1	1	1	4	2	2	2	2	2	1
1285	1	2	9	1	1	1	1	Teaching/Academic Rank	4	2	98	3	4	3	4	2	2	2	98	1	4	1	7	2	0	1	1	1	1	1	1	1	1	1	1	1	1	1	1	1	1	1	4	2	2	2	2	2	2
1286	1	1	6	4	1	1	5	Professional rank	3	2	98	4	4	4	4	1	2	2	2	1	4	1	7	2	0	1	1	1	1	1	1	1	1	1	1	1	1	1	1	1	1	1	4	2	2	2	2	2	1
1287	1	4	9	1	2	1	2	Professional rank	7	2	98	4	4	5	5	1	2	2	2	1	3	1	6	3	0	.	1	1	1	1	1	1	1	1	1	1	1	1	1	1	1	1	3	1	2	2	2	2	1
1288	1	4	9	1	2	2	2	Professional rank	7	2	98	4	5	4	5	2	1	2	98	1	4	1	6	3	0	.	1	1	1	1	1	1	1	1	1	1	1	1	1	1	1	1	4	1	2	2	2	2	1
1289	2	1	5	2	1	1	5	Professional rank	1	2	98	4	5	5	5	1	2	2	2	1	4	1	7	2	0	1	1	1	1	1	1	1	1	1	1	1	1	1	1	1	1	1	1	2	2	2	2	2	2
1290	1	2	6	1	1	1	5	Professional rank	3	1	1	3	4	4	5	1	2	2	2	1	3	1	6	3	0	.	.	.	.	.	.	.	0	.	.	.	.	.	.	.	.	.	4	2	2	2	2	2	1
1291	1	5	6	1	1	1	5	Trader/Artisans/Business	3	1	98	3	4	4	5	1	2	2	2	1	3	1	6	3	0	.	.	.	.	.	.	.	0	.	.	.	.	.	.	.	.	.	4	2	2	2	2	2	1
1292	1	5	9	1	1	1	5	Trader/Artisans/Business	3	1	98	3	4	4	5	1	2	2	2	1	3	1	6	3	0	.	.	.	.	.	.	.	0	.	.	.	.	.	.	.	.	.	4	2	2	2	2	2	1
1293	1	5	7	1	2	1	2	Trader/Artisans/Business	3	2	98	3	4	4	4	1	2	2	1	1	4	1	7	2	0	1	1	1	1	1	1	1	1	1	1	1	1	1	1	1	1	1	5	1	2	2	2	2	1
1294	1	5	7	4	1	1	5	Trader/Artisans/Business	6	2	98	3	3	4	5	1	2	2	2	1	3	1	7	2	0	.	.	.	.	.	.	.	0	.	.	.	.	.	.	.	.	.	4	2	3	3	3	3	3
1296	2	1	6	3	2	2	5	Administrative Rank	6	2	98	4	4	3	4	2	2	2	98	1	4	1	7	2	0	1	1	1	1	1	1	1	1	1	1	1	1	1	1	1	1	1	4	2	2	2	2	2	2
1297	1	2	8	2	2	1	2	Administrative Rank	4	2	98	3	4	5	4	2	2	2	98	1	3	1	6	3	0	1	1	1	1	1	1	1	1	1	1	1	1	1	1	1	1	1	1	1	2	2	2	2	1
1298	1	4	8	1	1	1	1	Administrative Rank	7	2	98	3	4	4	4	2	2	2	98	1	3	1	7	2	1	.	1	1	1	1	1	1	1	1	1	1	1	1	1	1	1	1	1	1	1	2	2	2	1
1299	1	2	8	1	2	2	5	Administrative Rank	6	2	98	4	4	2	4	1	2	2	2	1	4	1	7	2	0	1	1	1	1	1	1	1	1	1	1	1	1	1	1	1	1	1	1	2	2	2	2	2	1
1300	1	5	8	1	2	2	6	Trader/Artisans/Business	6	2	98	4	4	2	4	1	2	2	2	1	4	1	7	2	0	1	1	1	1	1	1	1	1	1	1	1	1	1	1	1	1	1	4	2	2	2	2	2	1
1301	1	4	8	2	2	1	2	Professional rank	7	2	98	4	5	5	5	1	2	2	2	1	4	1	6	3	0	.	1	1	1	1	1	1	1	1	1	1	1	1	1	1	1	1	4	1	1	2	2	2	2
1302	2	3	5	2	1	1	3	Professional rank	2	2	98	3	4	4	5	1	2	2	2	1	3	1	6	3	0	.	1	1	1	1	1	1	1	1	1	1	1	1	1	1	1	1	4	1	2	2	2	2	1
1303	1	4	8	1	1	1	4	Administrative Rank	5	1	1	3	4	4	5	1	2	2	2	1	2	1	6	3	0	.	1	1	1	1	1	1	1	1	1	1	1	1	1	1	1	1	4	1	2	2	2	2	1
1304	2	5	7	2	2	1	5	Administrative Rank	7	2	98	3	4	4	4	1	2	2	2	1	4	1	6	3	1	.	1	1	1	1	1	1	1	1	1	1	1	1	1	1	1	1	2	1	1	2	2	2	1
1305	1	1	5	1	1	1	6	Administrative Rank	1	2	98	4	4	4	4	1	2	2	1	1	4	1	7	2	0	1	1	1	1	1	1	1	1	1	1	1	1	1	1	1	1	1	4	2	2	2	2	2	2
1306	1	2	7	1	1	2	6	Trader/Artisans/Business	6	1	1	3	4	4	5	1	2	2	2	1	3	1	6	3	0	.	1	1	1	1	1	1	1	1	1	1	1	1	1	1	1	1	4	1	2	2	2	2	2
1307	1	5	6	1	1	1	6	Trader/Artisans/Business	6	1	98	3	4	4	5	1	2	2	1	1	3	1	6	3	0	.	.	.	.	.	.	.	0	.	.	.	.	.	.	.	.	.	2	2	2	2	2	2	1
1308	1	2	6	1	1	1	3	Teaching/Academic Rank	2	2	98	3	4	4	5	1	2	2	2	1	4	1	6	3	0	.	1	1	1	1	1	1	1	1	1	1	1	1	1	1	1	1	4	1	2	2	2	2	1
1309	1	2	8	1	2	2	6	Trader/Artisans/Business	6	2	98	4	4	2	4	1	2	2	2	1	4	1	7	2	0	1	1	1	1	1	1	1	1	1	1	1	1	1	1	1	1	1	1	2	2	2	2	2	1
1310	2	3	8	1	2	2	6	Trader/Artisans/Business	3	2	98	4	5	5	4	2	2	2	98	1	4	1	7	2	0	1	1	1	1	1	1	1	1	1	1	1	1	1	1	1	1	1	4	2	2	2	2	2	1
1311	1	5	8	1	2	1	6	Trader/Artisans/Business	6	2	98	3	4	4	4	1	2	2	1	1	4	1	7	2	0	1	1	1	1	1	1	1	1	1	1	1	1	1	1	1	1	1	5	1	2	2	2	2	1
1312	1	2	8	1	1	1	1	Teaching/Academic Rank	4	2	98	3	5	4	5	1	2	2	2	1	3	1	6	3	0	.	1	1	1	1	1	1	1	1	1	1	1	1	1	1	1	1	4	1	2	2	2	2	1
1313	1	3	7	3	1	2	1	Trader/Artisans/Business	7	2	98	3	5	5	5	2	2	2	98	1	1	1	7	2	0	.	1	1	1	1	1	1	1	1	1	1	1	1	1	1	1	1	4	1	1	2	2	2	1
1314	1	5	7	1	2	1	6	Teaching/Academic Rank	6	2	98	3	4	4	4	1	2	2	1	1	6	1	7	2	0	1	1	1	1	1	1	1	1	1	1	1	1	1	1	1	1	1	5	2	2	2	2	2	1
1315	2	3	6	1	2	2	3	Trader/Artisans/Business	3	2	98	3	4	4	5	1	2	2	2	1	4	1	6	3	0	.	1	1	1	1	1	1	1	1	1	1	1	1	1	1	1	1	5	1	2	2	2	2	2
1316	1	5	6	2	4	1	4	Professional rank	6	2	98	3	4	4	4	1	2	2	1	1	4	1	7	2	0	1	1	1	1	1	1	1	1	1	1	1	1	1	1	1	1	1	5	1	1	2	2	2	2
1318	1	2	7	1	1	2	4	Administrative Rank	1	1	98	3	4	4	4	2	2	1	98	1	6	1	7	2	1	1	.	.	.	.	.	.	0	.	.	.	.	.	.	.	.	.	5	1	1	2	2	2	2
1319	1	3	8	1	2	2	6	Administrative Rank	6	2	98	4	4	2	4	1	2	2	2	1	4	1	7	2	0	1	1	1	1	1	1	1	1	1	1	1	1	1	1	1	1	1	1	2	2	2	2	2	1
1320	1	5	6	1	1	1	6	Administrative Rank	6	1	98	3	4	4	5	1	2	2	2	1	3	1	6	3	0	.	.	.	.	.	.	.	0	.	.	.	.	.	.	.	.	.	4	2	2	2	2	2	1
1321	1	5	7	2	2	1	2	Trader/Artisans/Business	7	2	98	3	4	4	4	1	2	2	2	1	4	1	6	3	0	1	1	1	1	1	1	1	1	1	1	1	1	1	1	1	1	1	5	1	1	2	2	2	1
1322	1	5	6	2	4	1	6	Trader/Artisans/Business	6	2	98	3	4	4	4	1	2	2	2	1	4	1	6	3	0	1	1	1	1	1	1	1	1	1	1	1	1	1	1	1	1	1	5	1	1	2	2	2	2
1323	1	5	8	1	2	2	6	Teaching/Academic Rank	6	2	98	4	4	4	4	1	2	2	2	1	4	1	7	2	0	1	1	1	1	1	1	1	1	1	1	1	1	1	1	1	1	1	4	2	2	2	2	2	2
1324	1	5	8	1	2	1	6	Trader/Artisans/Business	6	2	98	4	4	4	4	1	2	2	2	2	4	1	7	2	0	1	1	1	1	1	1	1	1	1	1	1	1	1	1	1	1	1	4	2	2	2	2	2	1
1325	1	5	8	1	2	2	6	Trader/Artisans/Business	6	2	98	4	4	4	4	1	2	2	1	1	4	1	7	2	0	1	1	1	1	1	1	1	1	1	1	1	1	1	1	1	1	1	4	2	2	2	2	2	1
1326	1	3	8	1	1	2	6	Trader/Artisans/Business	7	2	98	3	4	4	5	1	2	2	2	1	3	1	7	2	0	.	1	1	1	1	1	1	1	1	1	1	1	1	1	1	1	1	4	1	2	2	2	2	1
1327	1	5	8	1	2	1	6	Teaching/Academic Rank	6	2	98	4	4	4	4	1	2	2	2	1	4	1	7	2	0	1	1	1	1	1	1	1	1	1	1	1	1	1	1	1	1	1	4	2	2	2	2	2	1
1328	1	4	6	1	2	1	1	Trader/Artisans/Business	5	2	98	3	4	4	4	1	2	2	3	1	3	1	6	3	0	.	1	1	1	1	1	1	1	1	1	1	1	1	1	1	1	1	5	1	2	2	2	2	1
1329	1	3	8	4	1	1	4	Teaching/Academic Rank	7	1	1	3	5	5	5	2	2	2	98	1	4	1	6	3	1	.	1	1	1	1	1	1	1	1	1	1	1	1	1	1	1	1	5	1	2	2	2	2	1
1330	1	5	8	1	1	1	6	Professional rank	6	2	98	3	4	4	4	1	2	2	3	1	4	1	7	2	0	1	1	1	1	1	1	1	1	1	1	1	1	1	1	1	1	1	4	1	2	3	3	3	3
1331	1	1	5	1	1	1	6	Professional rank	6	2	98	3	3	3	2	2	2	2	98	1	3	1	6	3	1	.	.	.	.	.	.	.	0	.	.	.	.	.	.	.	.	.	4	1	1	1	1	1	1
1332	1	3	8	1	1	1	2	Administrative Rank	6	2	98	3	4	4	4	1	2	2	2	1	3	1	6	3	0	.	1	1	1	1	1	1	1	1	1	1	1	1	1	1	1	1	4	1	2	2	2	2	2
1333	2	3	7	1	2	1	1	Administrative Rank	4	2	98	3	4	5	4	1	2	2	2	1	3	1	6	3	0	.	1	1	1	1	1	1	1	1	1	1	1	1	1	1	1	1	4	1	2	2	2	2	1
1334	1	5	10	1	1	1	6	Administrative Rank	6	2	98	3	4	4	5	1	2	2	3	1	3	1	6	3	0	.	.	.	.	.	.	.	0	.	.	.	.	.	.	.	.	.	4	2	2	2	2	2	1
1335	1	3	8	2	2	1	6	Administrative Rank	4	2	98	3	4	5	4	2	2	1	98	1	3	1	6	3	0	.	1	1	1	1	1	1	1	1	1	1	1	1	1	1	1	1	4	1	2	2	2	2	1
1336	1	5	9	1	1	1	4	Administrative Rank	7	2	98	3	3	3	4	2	2	2	98	1	3	1	1	1	1	.	1	1	1	1	1	1	1	1	1	1	1	1	1	1	1	1	5	3	3	2	2	2	1
1337	1	1	5	1	1	1	6	Administrative Rank	6	2	98	3	3	3	2	2	2	2	98	1	3	1	6	3	1	.	.	.	.	.	.	.	0	.	.	.	.	.	.	.	.	.	4	1	1	2	2	2	1
1338	1	1	6	2	1	1	6	Administrative Rank	6	2	98	4	4	4	4	2	2	2	98	1	4	1	7	2	0	1	1	1	1	1	1	1	1	1	1	1	1	1	1	1	1	1	5	2	2	2	2	2	1
1339	1	3	7	1	1	2	1	Administrative Rank	3	2	98	3	5	4	4	1	2	2	2	1	3	1	6	3	0	.	.	.	.	.	.	.	0	.	.	.	.	.	.	.	.	.	4	1	2	2	2	2	2
1340	2	3	8	1	2	1	2	Administrative Rank	6	2	98	3	5	4	5	1	2	2	2	1	3	1	6	3	0	.	1	1	1	1	1	1	1	1	1	1	1	1	1	1	1	1	4	1	2	2	2	2	1
1341	1	2	9	1	1	1	4	Administrative Rank	7	2	98	4	4	3	4	2	2	2	98	1	4	1	7	2	0	1	1	1	1	1	1	1	1	1	1	1	1	1	1	1	1	1	5	2	2	2	2	2	1
1342	1	3	8	1	2	2	6	Administrative Rank	6	2	98	4	4	2	4	1	2	2	2	1	4	1	7	2	0	1	1	1	1	1	1	1	1	1	1	1	1	1	1	1	1	1	4	2	2	2	2	2	1
1343	1	4	7	1	2	1	3	Administrative Rank	6	2	98	3	4	4	4	2	2	2	98	1	4	1	7	2	0	1	1	1	1	1	1	1	1	1	1	1	1	1	1	1	1	1	5	1	1	2	2	2	1
1344	1	2	7	2	1	1	1	Administrative Rank	3	1	98	3	5	5	5	2	2	1	98	1	4	1	6	3	0	.	.	.	.	.	.	.	0	.	.	.	.	.	.	.	.	.	1	2	2	2	2	2	1
1346	1	5	8	1	2	1	6	Administrative Rank	6	2	98	3	4	4	4	1	2	2	2	1	4	1	7	2	0	1	1	1	1	1	1	1	1	1	1	1	1	1	1	1	1	1	5	1	2	2	2	2	2
1347	1	5	8	1	1	1	2	Administrative Rank	5	1	1	2	4	4	4	2	2	2	98	1	3	1	1	1	1	.	1	1	1	1	1	1	1	1	1	1	1	1	1	1	1	1	4	2	1	2	2	2	1
1348	1	3	8	1	2	2	6	Administrative Rank	6	2	98	4	3	2	4	1	2	2	2	1	4	1	7	2	0	1	1	1	1	1	1	1	1	1	1	1	1	1	1	1	1	1	2	2	2	2	2	2	1
1349	1	5	7	1	2	1	4	Administrative Rank	6	1	98	4	4	2	1	2	2	2	98	2	3	1	6	3	0	.	1	1	1	1	1	1	1	1	1	1	1	1	1	1	1	1	4	2	2	1	1	1	1
1350	1	1	5	1	1	1	5	Trader/Artisans/Business	1	2	98	4	5	5	5	2	2	2	98	1	6	1	7	2	1	1	1	1	1	1	1	1	1	1	1	1	1	1	1	1	1	1	5	1	1	2	2	2	2
1352	1	3	7	2	1	1	4	Teaching/Academic Rank	7	2	98	4	5	4	5	2	2	2	98	1	2	1	1	1	0	.	1	1	1	1	1	1	1	1	1	1	1	1	1	1	1	1	1	1	1	2	2	2	1
1354	1	5	8	1	1	1	6	Teaching/Academic Rank	2	2	98	4	3	3	5	2	2	2	98	1	6	1	10	4	1	.	.	.	.	.	.	.	0	.	.	.	.	.	.	.	.	.	5	2	2	2	2	2	1
1355	1	3	4	1	1	2	1	Professional rank	6	2	98	4	3	4	4	2	2	2	98	1	4	1	6	3	1	.	.	.	.	.	.	.	0	.	.	.	.	.	.	.	.	.	5	1	1	2	2	2	2
1356	1	3	8	1	1	2	2	Professional rank	6	2	98	4	3	4	4	2	2	2	98	1	4	1	6	3	1	.	.	.	.	.	.	.	0	.	.	.	.	.	.	.	.	.	2	1	1	2	2	2	1
1357	2	5	6	2	2	1	1	Administrative Rank	6	2	98	4	3	4	4	2	2	2	98	1	4	1	6	3	1	.	.	.	.	.	.	.	0	.	.	.	.	.	.	.	.	.	5	1	1	2	2	2	1
1358	2	5	9	2	2	1	1	Administrative Rank	7	1	1	3	3	3	4	2	2	2	98	1	1	1	6	3	1	1	1	1	1	1	1	1	1	1	1	1	1	1	1	1	1	1	5	1	1	2	2	2	1
1359	2	3	7	1	2	2	3	Administrative Rank	6	2	98	3	3	3	4	2	2	2	98	1	1	1	6	3	1	1	1	1	1	1	1	1	1	1	1	1	1	1	1	1	1	1	4	1	1	2	2	2	1
1360	1	3	6	1	1	2	5	Administrative Rank	6	2	98	3	3	3	4	2	2	2	98	1	1	1	6	3	1	1	1	1	1	1	1	1	1	1	1	1	1	1	1	1	1	1	3	1	1	2	2	2	1
1362	1	2	7	1	1	1	1	Administrative Rank	3	1	1	3	4	3	4	2	2	2	98	1	6	1	10	4	0	1	.	.	.	.	.	.	0	.	.	.	.	.	.	.	.	.	5	1	1	1	1	1	1
1363	1	5	6	1	2	2	6	Administrative Rank	7	2	98	2	3	3	2	1	2	2	3	1	6	1	10	4	0	.	.	.	.	.	.	.	0	.	.	.	.	.	.	.	.	.	5	2	2	2	2	2	2
1365	1	3	6	1	2	1	3	Trader/Artisans/Business	7	2	98	3	3	3	3	2	2	2	98	2	3	1	10	4	0	.	.	.	.	.	.	.	0	.	.	.	.	.	.	.	.	.	5	1	3	2	2	2	1
1366	1	4	6	1	2	1	4	Trader/Artisans/Business	7	1	1	3	4	4	1	2	2	2	98	1	3	1	1	1	1	.	1	1	1	1	1	1	1	1	1	1	1	1	1	1	1	1	4	1	2	2	2	2	1
1368	1	2	6	1	1	1	5	Trader/Artisans/Business	2	2	98	4	3	4	5	2	2	2	98	1	1	1	10	4	1	1	1	1	1	1	1	1	1	1	1	1	1	1	1	1	1	1	5	1	1	2	2	2	2
1370	1	2	6	2	1	1	5	Professional rank	1	2	98	3	4	4	2	1	2	2	2	1	1	1	6	3	1	1	1	1	1	1	1	1	1	1	1	1	1	1	1	1	1	1	2	2	2	2	2	2	2
1371	2	1	5	4	1	1	5	Professional rank	1	2	98	4	5	5	5	2	2	2	98	1	1	1	6	3	1	1	.	.	.	.	.	.	0	.	.	.	.	.	1	1	.	.	4	1	2	2	2	2	1
1372	1	2	6	1	1	2	5	Administrative Rank	1	2	98	3	3	3	4	2	2	2	98	1	1	1	10	4	1	1	1	1	1	1	1	1	1	1	1	1	1	1	1	1	1	1	1	2	1	2	2	2	1
1374	1	2	7	1	1	1	1	Administrative Rank	5	2	98	3	4	5	4	2	2	2	98	2	3	1	10	4	0	.	.	.	.	.	.	.	0	.	.	.	.	.	1	1	.	.	5	2	2	1	1	1	1
1375	2	1	5	2	1	1	5	Administrative Rank	6	2	98	3	4	5	3	2	2	2	98	2	6	1	10	4	1	.	.	.	.	.	.	.	0	.	.	.	.	.	1	1	.	.	2	1	2	2	2	2	2
1376	2	1	6	1	1	1	5	Administrative Rank	6	2	98	4	5	5	5	2	2	2	98	1	2	1	1	1	0	.	.	.	.	.	.	.	0	.	.	.	.	.	1	1	.	.	4	1	1	2	2	2	1
1377	1	1	6	1	1	1	5	Administrative Rank	2	1	3	4	5	4	4	2	2	2	98	1	2	1	7	2	1	1	1	1	1	1	1	1	1	1	1	1	1	1	1	1	1	1	4	1	1	2	2	2	1
1379	2	4	5	1	2	1	4	Administrative Rank	1	2	98	3	3	4	4	1	1	1	2	2	3	1	7	2	1	1	1	1	1	1	1	1	1	1	1	1	1	1	1	1	1	1	4	1	2	2	2	2	2
1380	1	2	6	1	1	1	5	Trader/Artisans/Business	6	2	98	3	4	3	5	2	2	2	98	1	3	1	7	2	1	.	1	1	1	1	1	1	1	1	1	1	1	1	1	1	1	1	4	1	3	2	2	2	1
1382	1	2	7	1	1	1	4	Trader/Artisans/Business	6	2	98	4	5	5	5	1	2	2	2	1	3	1	6	3	1	.	1	1	1	1	1	1	1	1	1	1	1	1	1	1	1	1	4	2	2	2	2	2	1
1383	1	4	8	1	1	1	4	Administrative Rank	6	1	1	3	3	3	4	1	2	2	2	1	4	1	6	3	1	.	1	1	1	1	1	1	1	1	1	1	1	1	1	1	1	1	3	2	2	2	2	2	1
1386	2	3	8	1	1	2	6	Administrative Rank	3	1	1	3	4	5	4	2	2	2	98	1	2	1	7	2	1	.	1	1	1	1	1	1	1	1	1	1	1	1	1	1	1	1	4	1	1	2	2	2	2
1387	2	2	8	1	1	2	5	Trader/Artisans/Business	1	2	98	3	4	4	4	2	2	2	98	2	3	1	6	3	1	1	1	1	1	1	1	1	1	1	1	1	1	1	1	1	1	1	4	1	1	1	1	1	1
1388	1	3	8	2	1	1	1	Professional rank	5	2	98	4	5	5	5	2	2	2	98	1	3	1	6	3	0	.	.	.	.	.	.	.	0	.	.	.	.	.	.	.	.	.	5	1	1	2	2	2	1
1390	1	1	5	4	1	1	5	Administrative Rank	1	2	98	4	3	5	2	2	2	2	98	2	3	1	10	4	1	1	.	.	.	.	.	.	0	.	.	.	.	.	.	1	.	.	1	1	2	2	2	2	2
1392	2	1	6	1	1	1	5	Administrative Rank	1	2	98	4	5	5	4	1	2	2	2	1	6	1	7	2	1	.	1	1	1	1	1	1	1	1	1	1	1	1	1	1	1	1	1	1	2	2	2	2	2
1394	1	3	7	2	1	1	4	Trader/Artisans/Business	1	1	1	4	5	3	3	1	1	1	2	1	3	1	7	2	1	1	1	1	1	1	1	1	1	1	1	1	1	1	1	1	1	1	4	1	1	2	2	2	2
1395	2	5	5	2	1	1	5	Teaching/Academic Rank	6	2	98	3	4	3	3	2	2	2	98	1	3	1	1	1	1	1	1	1	1	1	1	1	1	1	1	1	1	1	1	1	1	1	4	1	2	2	2	2	2
1396	1	1	6	1	1	1	5	Trader/Artisans/Business	1	2	98	3	5	2	4	1	2	2	2	1	3	1	10	4	1	.	1	1	1	1	1	1	1	1	1	1	1	1	1	1	1	1	5	1	1	1	1	1	1
1397	2	5	5	1	1	1	5	Trader/Artisans/Business	1	2	98	3	4	4	4	2	2	2	98	2	3	1	7	2	0	.	1	1	1	1	1	1	1	1	1	1	1	1	1	1	1	1	1	1	1	2	2	2	2
1398	2	2	9	1	1	2	5	Trader/Artisans/Business	6	2	98	4	5	5	1	2	2	2	98	1	4	1	10	4	1	1	1	1	1	1	1	1	1	1	1	1	1	1	1	1	1	1	4	1	2	2	2	2	2
1399	2	2	6	2	1	1	5	Trader/Artisans/Business	1	2	98	4	3	3	2	2	2	2	98	1	3	1	7	2	1	1	1	1	1	1	1	1	1	1	1	1	1	1	1	1	1	1	5	1	1	2	2	2	2
1400	1	2	6	1	1	3	6	Trader/Artisans/Business	2	2	98	3	4	4	5	2	1	2	98	1	3	1	7	2	1	.	.	1	.	.	.	.	0	.	.	.	.	.	.	.	.	.	5	1	2	2	2	2	2
1401	1	5	8	1	2	1	3	Administrative Rank	7	1	1	3	4	4	4	2	2	1	98	1	6	1	6	3	1	1	1	1	1	1	1	1	1	1	1	1	1	1	1	1	1	1	4	1	1	2	2	2	2
1403	2	2	7	2	1	1	2	Professional rank	5	1	1	3	4	5	4	2	2	2	98	1	4	1	6	3	1	1	1	1	1	1	1	1	1	1	1	1	1	1	1	1	1	1	5	1	1	1	1	1	1
1404	2	4	7	1	2	1	2	Professional rank	7	2	98	3	4	4	4	1	2	2	2	1	3	1	7	2	0	1	1	1	1	1	1	1	1	1	1	1	1	1	1	1	1	1	4	2	1	2	2	2	2
1406	2	5	6	2	5	1	4	Professional rank	2	2	98	3	2	2	3	2	2	2	98	1	6	1	6	3	1	.	1	1	1	1	1	1	1	1	1	1	1	1	1	1	1	1	4	3	2	2	2	2	2
1407	1	4	8	1	2	1	6	Administrative Rank	7	1	1	4	5	3	5	2	2	2	98	1	1	1	6	3	1	1	1	1	1	1	1	1	1	1	1	1	1	1	1	1	1	1	5	1	1	2	2	2	2
1408	2	3	8	1	2	1	1	Administrative Rank	4	1	4	3	3	4	3	2	2	2	98	1	1	1	6	3	1	1	1	1	1	1	1	1	1	1	1	1	1	1	1	1	1	1	3	1	1	2	2	2	2
1410	2	2	7	1	2	1	1	Trader/Artisans/Business	7	2	98	3	4	4	4	2	2	2	98	1	2	1	1	1	0	1	.	1	.	.	.	.	0	.	.	.	.	.	.	.	.	.	5	2	2	2	2	2	2
1411	2	5	8	2	2	1	6	Trader/Artisans/Business	3	2	98	3	3	4	4	1	2	1	2	1	4	1	6	3	0	1	1	1	1	1	1	1	1	1	1	1	1	1	1	1	1	1	5	2	2	2	2	2	2
1412	2	2	6	1	1	2	5	Trader/Artisans/Business	6	2	98	3	4	3	3	2	2	2	98	1	1	1	6	3	0	.	.	.	.	.	.	.	0	.	.	.	.	.	.	1	.	.	5	3	3	2	2	2	2
1414	2	2	6	1	1	2	5	Trader/Artisans/Business	1	2	98	4	5	5	5	2	2	2	98	1	1	1	6	3	1	1	.	1	.	.	.	.	0	.	.	.	.	.	.	1	.	.	2	1	2	2	2	2	2
1415	2	2	6	2	1	1	5	Professional rank	6	2	98	3	4	3	5	2	2	2	98	1	2	1	7	2	1	.	1	1	1	1	1	1	1	1	1	1	1	1	1	1	1	1	5	3	3	2	2	2	2
1416	2	3	7	1	1	1	1	Professional rank	3	2	98	4	3	3	4	2	2	2	98	1	1	1	6	3	0	.	1	1	1	1	1	1	1	1	1	1	1	1	1	1	1	1	5	1	2	2	2	2	2
1418	2	2	6	2	1	2	5	Administrative Rank	6	2	98	4	3	3	4	2	2	2	98	1	1	1	6	3	0	.	1	1	1	1	1	1	1	1	1	1	1	1	1	1	1	1	4	1	2	2	2	2	2
1419	1	2	6	1	1	1	5	Administrative Rank	1	2	98	3	4	5	4	2	2	2	98	1	1	1	7	2	1	1	.	1	.	.	.	.	0	.	.	.	.	.	.	.	.	.	5	1	2	2	2	2	2
1420	1	4	7	1	2	1	1	Trader/Artisans/Business	5	2	98	3	5	1	1	1	1	1	2	1	3	1	10	4	0	.	.	1	.	.	.	.	0	.	.	.	.	.	.	1	.	.	2	1	2	2	2	2	2
1426	2	2	6	1	1	2	5	Teaching/Academic Rank	6	2	98	4	3	3	4	2	2	2	98	1	1	1	6	3	0	.	1	1	1	1	1	1	1	1	1	1	1	1	1	1	1	1	4	1	2	2	2	2	2
1427	1	3	6	1	1	1	1	Trader/Artisans/Business	2	2	98	3	4	3	5	2	2	2	98	1	3	1	7	2	1	.	1	1	1	1	1	1	1	1	1	1	1	1	1	1	1	1	4	3	3	2	2	2	2
1428	2	1	6	4	1	1	5	Teaching/Academic Rank	6	2	98	3	4	3	3	2	2	2	98	1	1	1	6	3	0	.	.	1	.	.	.	.	0	.	.	.	.	.	.	.	.	.	5	3	3	2	2	2	2
1429	1	2	6	2	1	1	5	Trader/Artisans/Business	1	2	98	4	5	5	1	2	2	2	98	2	4	1	10	4	1	1	1	1	1	1	1	1	1	1	1	1	1	1	1	1	1	1	2	3	3	3	3	3	3
1431	2	1	6	1	1	1	5	Trader/Artisans/Business	1	2	98	4	4	4	4	2	2	2	98	1	3	1	7	2	1	.	.	.	.	.	.	.	0	.	.	.	.	.	.	.	.	.	4	2	2	2	2	2	2
1432	2	1	6	1	1	1	5	Teaching/Academic Rank	1	2	98	4	5	4	3	2	2	2	98	1	4	1	6	3	1	1	.	.	.	.	.	.	0	.	.	.	.	.	.	.	.	.	5	1	1	2	2	2	2
1433	1	3	4	1	1	2	1	Trader/Artisans/Business	1	2	98	3	3	4	4	1	1	1	2	1	4	1	7	2	1	1	1	1	1	1	1	1	1	1	1	1	1	1	1	1	1	1	2	1	1	2	2	2	2
1434	1	3	7	1	2	2	1	Teaching/Academic Rank	5	2	98	4	5	5	1	2	2	2	98	1	4	1	10	4	0	.	1	1	1	1	1	1	1	1	1	1	1	1	1	1	1	1	1	1	2	2	2	2	2
1436	1	3	5	1	2	2	3	Professional rank	4	2	98	3	4	4	4	2	2	2	98	2	3	1	10	4	0	1	1	1	1	1	1	1	1	1	1	1	1	1	1	1	1	1	5	2	2	2	2	2	2
1437	1	4	9	1	2	1	1	Administrative Rank	5	2	98	3	3	3	3	2	2	2	98	1	4	1	6	3	1	1	1	1	1	1	1	1	1	1	1	1	1	1	1	1	1	1	3	1	1	2	2	2	2
1438	1	1	3	1	1	1	5	Trader/Artisans/Business	6	2	98	4	5	5	5	2	2	2	98	1	6	1	10	4	1	1	.	1	.	.	.	.	0	.	.	.	.	.	1	.	.	.	4	1	2	2	2	2	2
1439	2	2	6	1	2	1	1	Teaching/Academic Rank	3	1	3	3	4	5	3	1	2	2	2	1	1	1	7	2	0	.	.	1	.	.	.	.	0	.	.	.	.	.	1	.	.	.	5	2	1	2	2	2	2
1440	2	5	5	1	1	1	6	Professional rank	6	2	98	4	4	2	4	2	2	2	98	1	3	1	7	2	1	1	1	1	1	1	1	1	1	1	1	1	1	1	1	1	1	1	5	2	1	2	2	2	2
1441	2	3	8	1	1	2	5	Administrative Rank	3	1	98	3	4	5	3	2	2	2	98	1	3	1	7	2	1	.	.	.	.	.	.	.	0	.	.	.	.	.	1	.	.	.	1	1	1	1	1	1	1
1442	1	3	9	4	5	1	6	Trader/Artisans/Business	1	2	98	4	5	5	5	2	2	2	98	1	1	1	6	3	1	1	.	.	.	.	.	.	0	.	.	.	.	.	1	.	.	.	1	1	2	2	2	2	2
1444	2	2	6	1	1	2	5	Professional rank	1	2	98	4	5	3	4	2	2	1	2	1	3	1	7	2	1	1	1	1	1	1	1	1	1	1	1	1	1	1	1	1	1	1	5	2	1	2	2	2	2
1446	1	3	8	1	1	2	3	Professional rank	4	1	1	3	5	4	5	1	1	2	2	1	2	1	10	4	1	.	1	1	1	1	1	1	1	1	1	1	1	1	1	1	1	1	4	2	2	2	2	2	2
1447	2	1	3	1	1	1	5	Professional rank	6	2	98	3	5	4	2	2	2	2	98	1	6	1	10	4	1	1	1	1	1	1	1	1	1	1	1	1	1	1	1	1	1	1	5	2	2	2	2	2	2
1448	2	6	3	1	2	1	4	Professional rank	1	2	98	2	5	5	4	1	2	1	2	1	4	1	6	3	0	1	1	1	1	1	1	1	1	1	1	1	1	1	1	1	1	1	5	2	2	2	2	2	2
1451	1	3	7	2	1	1	2	Trader/Artisans/Business	6	2	98	3	3	3	4	2	2	2	98	1	1	1	6	3	1	1	1	1	1	1	1	1	1	1	1	1	1	1	1	1	1	1	2	1	1	2	2	2	2
1452	2	1	5	2	1	1	5	Trader/Artisans/Business	6	2	98	4	4	4	5	2	2	2	98	2	3	1	7	2	0	1	.	.	.	.	.	.	0	.	.	.	.	.	.	.	.	.	5	1	2	2	2	2	2
1453	1	3	7	1	1	1	5	Trader/Artisans/Business	6	2	98	3	3	2	3	1	2	2	2	1	4	1	6	3	1	1	1	1	1	1	1	1	1	1	1	1	1	1	1	1	1	1	3	1	1	2	2	2	2
1454	2	2	8	1	1	2	5	Administrative Rank	1	2	98	4	5	3	3	2	2	2	98	1	2	1	10	4	0	.	.	.	.	.	.	.	0	.	.	.	.	.	.	.	.	.	4	1	2	2	2	2	2
1456	2	3	9	1	1	1	5	Administrative Rank	1	2	98	4	5	5	5	1	2	2	2	2	3	1	7	2	1	1	.	.	.	.	.	.	0	.	.	.	.	.	.	.	.	.	2	1	1	2	2	2	2
1457	1	2	8	1	1	2	5	Administrative Rank	1	2	98	4	5	5	2	2	2	2	98	1	3	1	6	3	1	.	1	1	1	1	1	1	1	1	1	1	1	1	1	1	1	1	5	2	1	2	2	2	2
1458	1	3	6	1	2	1	2	Clergy Rank	7	1	1	3	4	4	4	2	2	1	98	1	3	1	7	2	0	1	1	1	1	1	1	1	1	1	1	1	1	1	1	1	1	1	5	1	1	2	2	2	2
1459	2	3	7	1	1	1	1	Professional rank	6	2	98	3	3	3	5	2	2	2	98	1	4	1	6	3	1	1	1	1	1	1	1	1	1	1	1	1	1	1	1	1	1	1	3	1	1	2	2	2	2
1460	2	1	5	1	1	1	5	Professional rank	1	2	98	4	5	4	4	1	2	1	2	2	4	1	7	2	1	.	1	1	1	1	1	1	1	1	1	1	1	1	1	1	1	1	1	2	1	2	2	2	2
1461	1	5	8	1	1	1	5	Administrative Rank	6	2	98	3	3	2	3	1	2	2	1	1	4	1	6	3	0	1	1	1	1	1	1	1	1	1	1	1	1	1	1	1	1	1	4	1	1	2	2	2	2
1463	1	3	8	2	1	1	1	Administrative Rank	5	2	98	4	5	5	5	2	2	2	98	1	3	1	6	3	1	1	1	1	1	1	1	1	1	1	1	1	1	1	1	1	1	1	1	1	1	2	2	2	2
1464	2	3	8	1	1	1	5	Trader/Artisans/Business	6	2	98	4	5	5	5	2	2	2	98	1	6	1	10	4	1	1	.	.	.	.	.	.	0	.	.	.	.	.	.	.	.	.	4	1	2	2	2	2	2
1466	2	2	8	1	1	1	5	Teaching/Academic Rank	6	2	98	2	3	3	2	1	2	2	1	1	6	1	10	4	0	.	.	.	.	.	.	.	0	.	.	.	.	.	.	.	.	.	4	2	2	2	2	2	2
1468	2	3	6	2	2	1	3	Trader/Artisans/Business	6	2	98	2	3	3	2	1	2	2	2	1	6	1	10	4	0	.	.	.	.	.	.	.	0	.	.	.	.	.	.	.	.	.	4	2	2	2	2	2	2
1469	2	1	5	1	1	2	5	Trader/Artisans/Business	1	2	98	4	5	5	1	1	2	1	2	2	6	1	10	4	0	.	1	1	1	1	1	1	1	1	1	1	1	1	1	1	1	1	4	2	2	2	2	2	2
1470	1	3	8	1	1	1	1	Teaching/Academic Rank	5	2	98	3	4	4	4	1	2	2	2	1	3	1	7	2	0	1	1	1	1	1	1	1	1	1	1	1	1	1	1	1	1	1	4	1	1	2	2	2	2
1471	1	3	8	3	1	2	1	Trader/Artisans/Business	7	2	98	4	5	5	5	2	2	2	98	2	1	1	7	2	0	1	.	.	.	.	.	.	0	.	.	.	.	.	.	.	.	.	5	1	1	2	2	2	2
1472	2	2	7	1	1	2	4	Teaching/Academic Rank	3	2	98	4	5	5	5	2	2	2	98	2	3	1	1	1	0	.	.	.	.	.	.	.	0	.	.	.	.	.	.	.	.	.	5	1	2	2	2	2	2
1473	2	4	3	4	1	1	3	Trader/Artisans/Business	6	2	98	2	3	3	2	1	2	2	2	1	6	1	10	4	0	.	.	.	.	.	.	.	0	.	.	.	.	.	.	.	.	.	5	2	2	2	2	2	2
1474	1	3	6	1	1	1	5	Professional rank	6	2	98	3	4	4	5	2	2	2	98	1	2	1	1	1	1	1	1	1	1	1	1	1	1	1	1	1	1	1	1	1	1	1	5	2	2	2	2	2	2
1478	1	2	7	1	2	1	4	Administrative Rank	4	2	98	4	5	5	1	2	2	2	98	2	2	1	1	1	0	1	1	1	1	1	1	1	1	1	1	1	1	1	1	1	1	1	4	1	1	1	1	1	1
1479	2	2	6	1	1	2	5	Trader/Artisans/Business	1	2	98	4	5	5	1	2	2	2	98	2	2	1	7	2	0	.	1	1	1	1	1	1	1	1	1	1	1	1	1	1	1	1	4	1	1	2	2	2	2
1480	1	2	8	1	1	1	5	Trader/Artisans/Business	2	2	98	4	5	5	3	2	2	1	98	2	4	1	7	2	0	.	.	.	.	.	.	.	0	.	.	.	.	.	.	.	.	.	4	2	2	2	2	2	2
1483	2	1	5	1	1	1	5	Trader/Artisans/Business	1	2	98	4	5	5	5	2	2	2	98	2	3	1	7	2	1	.	1	1	1	1	1	1	1	1	1	1	1	1	1	1	1	1	4	2	1	2	2	2	2
1484	2	3	7	2	1	1	1	Trader/Artisans/Business	4	2	98	4	5	5	5	2	2	2	98	1	3	1	6	3	0	.	1	1	1	1	1	1	1	1	1	1	1	1	1	1	1	1	4	1	1	2	2	2	2
1485	1	4	8	1	2	1	4	Teaching/Academic Rank	7	2	98	2	4	4	5	2	2	2	98	1	4	1	10	4	1	.	.	.	.	.	.	.	0	.	.	.	.	.	.	.	.	.	2	1	2	2	2	2	2
1486	2	1	6	1	1	1	6	Trader/Artisans/Business	1	2	98	3	5	3	5	2	2	2	98	1	6	1	7	2	0	1	.	.	.	.	.	.	0	.	.	.	.	.	.	.	.	.	5	1	2	2	2	2	2
1487	1	1	6	2	1	1	5	Teaching/Academic Rank	1	2	98	4	5	5	3	2	2	2	98	1	3	1	10	4	1	1	.	.	.	.	.	.	0	.	.	.	.	.	.	.	.	.	5	2	2	2	2	2	2
1488	2	1	6	2	1	1	5	Professional rank	6	2	98	2	4	3	5	2	2	2	98	1	2	1	6	3	1	.	1	1	1	1	1	1	1	1	1	1	1	1	1	1	1	1	5	2	1	2	2	2	2
1489	1	2	8	2	1	1	5	Professional rank	6	2	98	3	5	4	1	2	2	2	98	1	3	1	10	4	0	.	.	.	.	.	.	.	0	.	.	.	.	.	.	.	.	.	5	1	2	3	3	3	3
1490	2	1	5	4	1	1	5	Administrative Rank	2	2	98	4	5	5	4	2	2	2	98	1	3	1	10	4	1	1	1	1	1	1	1	1	1	1	1	1	1	1	1	1	1	1	1	1	2	2	2	2	2
1491	2	1	5	2	1	1	5	Administrative Rank	1	2	98	4	4	5	1	2	2	2	98	1	3	1	7	2	0	.	1	1	1	1	1	1	1	1	1	1	1	1	1	1	1	1	4	2	1	2	2	2	2
1492	2	1	6	1	1	1	5	Administrative Rank	1	2	98	3	3	4	3	2	2	2	98	1	3	1	10	4	1	1	.	.	.	.	.	.	0	.	.	.	.	.	.	.	.	.	4	1	2	2	2	2	2
1494	2	2	6	4	1	1	5	Administrative Rank	7	2	98	3	4	3	5	2	2	2	98	1	2	1	7	2	1	.	1	1	1	1	1	1	1	1	1	1	1	1	1	1	1	1	2	3	3	2	2	2	2
1495	2	3	8	3	1	2	1	Administrative Rank	6	2	98	3	3	2	3	1	1	2	2	1	3	1	1	1	0	.	.	.	.	.	.	.	0	.	.	.	.	.	.	.	.	.	5	1	2	2	2	2	2
1496	2	5	4	4	2	2	4	Administrative Rank	7	2	98	2	3	3	2	1	2	2	2	1	6	1	10	4	0	.	.	.	.	.	.	.	0	.	.	.	.	.	.	.	.	.	5	2	2	2	2	2	2
1497	2	5	1	2	2	1	4	Administrative Rank	7	2	98	2	3	3	2	1	2	2	2	1	6	1	10	4	0	.	.	.	.	.	.	.	0	.	.	.	.	.	.	.	.	.	4	2	2	2	2	2	2
1498	2	5	6	2	2	1	2	Administrative Rank	6	1	1	2	3	3	2	1	2	2	2	1	6	1	10	4	0	.	.	.	.	.	.	.	0	.	.	.	.	.	.	.	.	.	5	2	2	2	2	2	2
1499	1	4	8	1	2	1	1	Administrative Rank	5	2	98	3	3	2	3	1	1	2	2	1	3	1	1	1	0	.	.	.	.	.	.	.	0	.	.	.	.	.	.	.	.	.	5	1	2	2	2	2	2
1501	2	1	5	1	1	2	5	Administrative Rank	1	2	98	4	4	5	1	2	2	2	98	1	3	1	7	2	1	.	.	.	.	.	.	.	0	.	.	.	.	.	.	.	.	.	1	2	1	2	2	2	2
1502	1	5	6	2	2	1	1	Administrative Rank	5	2	98	3	5	1	1	1	1	1	1	1	3	1	10	4	0	.	.	.	.	.	.	.	0	.	.	.	.	.	.	.	.	.	5	1	2	2	2	2	2
1503	2	4	8	2	5	2	2	Administrative Rank	6	2	98	3	5	1	1	1	1	1	1	1	3	1	10	4	0	.	.	.	.	.	.	.	0	.	.	.	.	.	.	.	.	.	2	1	2	2	2	2	2
1504	2	1	5	4	1	1	5	Administrative Rank	1	2	98	4	5	5	5	2	2	2	98	1	1	1	10	4	1	1	.	.	.	.	.	.	0	.	.	.	.	.	.	.	.	.	1	1	2	2	2	2	2
1505	2	1	5	2	1	1	5	Administrative Rank	7	2	98	4	5	5	1	2	2	2	98	1	4	1	10	4	1	1	1	1	1	1	1	1	1	1	1	1	1	1	1	1	1	1	1	1	2	2	2	2	2
1506	2	6	9	4	5	2	6	Administrative Rank	7	2	98	2	3	3	2	1	2	2	1	2	6	1	10	4	0	.	.	.	.	.	.	.	0	.	.	.	.	.	.	.	.	.	5	2	2	2	2	2	2
1507	2	2	7	2	1	1	4	Administrative Rank	2	2	98	4	4	4	4	1	2	2	2	1	2	1	7	2	1	.	1	1	1	1	1	1	1	1	1	1	1	1	1	1	1	1	4	1	2	1	1	1	1
1508	2	6	7	2	2	1	1	Trader/Artisans/Business	2	1	1	3	4	4	2	1	2	1	2	1	3	1	6	3	1	1	1	1	1	1	1	1	1	1	1	1	1	1	1	1	1	1	4	1	2	2	2	2	2
1509	1	5	10	4	5	1	6	Trader/Artisans/Business	4	1	1	2	3	4	4	1	1	1	2	1	6	1	10	4	1	1	1	1	1	1	1	1	1	1	1	1	1	1	1	1	1	1	4	1	1	2	2	2	2
1510	1	2	6	2	1	1	5	Teaching/Academic Rank	2	2	98	4	5	5	4	2	2	2	98	2	4	1	10	4	1	1	.	.	.	.	.	.	0	.	.	.	.	.	.	.	.	.	5	2	1	2	2	2	2
1511	2	6	6	1	1	1	5	Trader/Artisans/Business	1	2	98	3	4	5	3	2	2	2	98	1	6	1	6	3	0	.	.	.	.	.	.	.	0	.	.	.	.	.	.	.	.	.	4	1	1	1	1	1	1
1512	2	2	7	2	1	1	5	Teaching/Academic Rank	1	2	98	4	4	4	3	2	2	2	98	1	2	1	1	1	1	.	1	1	1	1	1	1	1	1	1	1	1	1	1	1	1	1	4	2	1	1	1	1	1
1513	1	1	5	1	1	1	2	Professional rank	1	2	98	3	4	5	4	2	2	2	98	1	4	1	1	1	0	1	1	1	1	1	1	1	1	1	1	1	1	1	1	1	1	1	5	1	1	2	2	2	2
1514	2	2	6	2	2	1	4	Professional rank	1	2	98	3	4	5	4	2	2	1	98	1	6	1	6	3	0	1	1	1	1	1	1	1	1	1	1	1	1	1	1	1	1	1	4	1	1	2	2	2	2
1515	1	1	6	1	1	2	5	Administrative Rank	7	2	98	3	4	4	4	2	2	2	98	1	3	1	10	4	0	.	1	1	1	1	1	1	1	1	1	1	1	1	1	1	1	1	1	1	2	2	2	2	2
1518	2	6	10	4	5	2	6	Administrative Rank	7	2	98	3	5	5	2	2	2	2	98	1	6	1	10	4	1	1	1	1	1	1	1	1	1	1	1	1	1	1	1	1	1	1	5	2	2	2	2	2	2
1519	1	2	7	1	1	2	5	Administrative Rank	7	2	98	3	5	5	1	2	2	2	98	1	6	1	10	4	1	1	1	1	1	1	1	1	1	1	1	1	1	1	1	1	1	1	4	2	2	2	2	2	2
1520	2	1	3	2	1	1	5	Administrative Rank	1	2	98	3	5	5	4	2	2	2	98	1	6	1	10	4	1	1	1	1	1	1	1	1	1	1	1	1	1	1	1	1	1	1	4	2	2	2	2	2	2
1521	2	3	8	1	1	1	2	Administrative Rank	7	2	98	3	3	3	4	2	2	2	98	1	4	1	6	3	1	1	1	1	1	1	1	1	1	1	1	1	1	1	1	1	1	1	5	1	1	2	2	2	2
1522	2	3	6	1	2	2	4	Administrative Rank	7	2	98	3	5	5	3	2	2	2	98	1	6	1	10	4	1	1	1	1	1	1	1	1	1	1	1	1	1	1	1	1	1	1	5	2	2	2	2	2	2
1524	2	2	6	1	1	1	5	Trader/Artisans/Business	7	2	98	3	5	5	4	2	2	2	98	1	1	1	6	3	1	1	.	.	.	.	.	.	0	.	.	.	.	.	.	.	.	.	4	3	3	3	3	3	3
1527	2	2	8	1	1	1	5	Teaching/Academic Rank	1	2	98	4	5	4	5	2	2	2	98	2	6	1	10	4	1	1	1	1	1	1	1	1	1	1	1	1	1	1	1	1	1	1	5	2	2	2	2	2	2
1528	2	6	10	4	5	2	6	Professional rank	7	2	98	3	4	5	3	2	2	2	98	2	6	1	10	4	1	.	.	.	.	.	.	.	0	.	.	.	.	.	.	.	.	.	5	1	2	2	2	2	2
1530	2	6	7	1	1	2	5	Administrative Rank	1	2	98	4	5	5	4	2	2	2	98	1	3	1	7	2	1	1	1	1	1	1	1	1	1	1	1	1	1	1	1	1	1	1	4	2	2	2	2	2	2
1531	2	3	6	1	1	2	4	Administrative Rank	2	2	98	3	3	3	4	2	2	2	98	1	4	1	6	3	1	1	.	.	.	.	.	.	0	.	.	.	.	.	.	.	.	.	5	2	1	2	2	2	2
1532	1	2	7	1	1	2	5	Administrative Rank	1	2	98	4	5	5	3	1	2	1	2	1	2	1	7	2	1	1	.	.	.	.	.	.	0	.	.	.	.	.	.	.	.	.	5	2	1	2	2	2	2
1533	1	1	5	1	1	1	5	Administrative Rank	7	2	98	3	4	5	4	2	2	2	98	1	3	1	10	4	0	1	.	.	.	.	.	.	0	.	.	.	.	.	.	.	.	.	5	1	2	2	2	2	2
1536	2	5	7	2	2	1	1	Administrative Rank	4	2	98	3	3	5	5	2	2	2	98	1	1	1	10	4	1	1	1	1	1	1	1	1	1	1	1	1	1	1	1	1	1	1	4	1	2	1	1	1	1
1537	2	2	6	1	1	2	5	Administrative Rank	1	2	98	4	5	5	4	2	2	2	98	1	3	1	7	2	1	1	1	1	1	1	1	1	1	1	1	1	1	1	1	1	1	1	4	1	2	2	2	2	2
1538	2	2	8	1	1	1	5	Trader/Artisans/Business	1	2	98	4	5	4	5	1	2	1	2	2	6	1	10	4	0	.	.	.	.	.	.	.	0	.	.	.	.	.	.	.	.	.	5	2	2	2	2	2	2
1539	1	2	6	1	1	2	5	Trader/Artisans/Business	7	2	98	3	4	5	3	2	2	2	98	2	6	1	10	4	1	1	1	1	1	1	1	1	1	1	1	1	1	1	1	1	1	1	4	3	3	3	3	3	3
1542	2	2	6	1	1	1	5	Administrative Rank	7	2	98	2	3	3	2	1	2	2	2	1	6	1	10	4	0	.	.	.	.	.	.	.	0	.	.	.	.	.	.	.	.	.	4	2	2	2	2	2	2
1543	1	5	6	1	2	2	4	Administrative Rank	7	2	98	2	3	3	2	1	2	2	2	1	6	1	10	4	0	.	.	.	.	.	.	.	0	.	.	.	.	.	.	.	.	.	4	2	2	2	2	2	2
1544	2	4	6	3	1	2	1	Administrative Rank	5	2	98	2	3	3	2	1	2	2	2	1	3	1	10	4	0	.	.	.	.	.	.	.	1	.	.	.	.	.	.	.	.	.	2	3	3	2	2	2	2
1545	1	4	7	2	1	1	1	Clergy Rank	7	2	98	3	3	2	3	1	1	2	1	1	3	1	1	1	0	.	.	.	.	.	.	.	0	.	.	.	.	.	.	.	.	.	5	1	2	2	2	2	2
1546	1	4	3	1	5	2	3	Professional rank	7	2	98	2	3	3	2	1	2	2	1	1	6	1	10	4	0	.	.	.	.	.	.	.	0	.	.	.	.	.	.	.	.	.	5	2	2	2	2	2	2
1547	1	1	6	2	1	1	4	Professional rank	3	2	98	2	4	4	3	2	2	2	98	2	3	1	10	4	1	.	1	1	1	1	1	1	1	1	1	1	1	1	1	1	1	1	5	2	2	2	2	2	2
1549	2	1	6	1	1	1	5	Administrative Rank	7	2	98	4	5	5	5	2	2	2	98	1	6	1	10	4	1	1	.	.	.	.	.	.	0	.	.	.	.	.	.	.	.	.	5	1	2	2	2	2	2
1550	2	2	6	1	1	1	4	Administrative Rank	3	2	98	3	4	4	4	2	2	2	98	2	3	1	10	4	0	1	1	1	1	1	1	1	1	1	1	1	1	1	1	1	1	1	4	2	2	2	2	2	2
1554	1	4	3	1	5	1	3	Trader/Artisans/Business	7	2	98	2	3	3	2	1	2	2	2	1	2	1	10	4	0	.	.	.	.	.	.	.	0	.	.	.	.	.	.	.	.	.	5	1	2	2	2	2	2
1555	1	6	8	1	2	2	6	Trader/Artisans/Business	7	2	98	2	3	3	2	1	2	2	2	1	2	1	10	4	0	.	.	.	.	.	.	.	0	.	.	.	.	.	.	.	.	.	4	1	2	2	2	2	2
1556	2	3	6	2	1	1	1	Trader/Artisans/Business	7	2	98	2	3	3	2	1	2	2	2	1	2	1	10	4	0	.	.	.	.	.	.	.	0	.	.	.	.	.	.	.	.	.	5	1	2	2	2	2	2
1557	1	2	6	1	1	1	6	Trader/Artisans/Business	1	1	1	3	5	4	4	2	1	1	98	1	2	1	7	2	1	1	.	.	.	.	.	.	0	.	.	.	.	.	.	.	.	.	5	1	2	2	2	2	2
1558	2	6	7	1	5	2	2	Trader/Artisans/Business	7	2	98	3	4	5	5	1	2	2	2	1	3	1	1	1	1	1	1	1	1	1	1	1	1	1	1	1	1	1	1	1	1	1	4	1	1	2	2	2	2
1559	2	5	5	1	5	2	3	Administrative Rank	4	1	1	3	4	4	4	1	2	2	2	1	6	1	10	4	1	1	1	1	1	1	1	1	1	1	1	1	1	1	1	1	1	1	1	1	1	2	2	2	2
1560	2	5	7	1	2	1	1	Administrative Rank	7	2	98	4	4	4	4	2	2	2	98	1	2	1	7	2	1	.	1	1	1	1	1	1	1	1	1	1	1	1	1	1	1	1	2	1	2	2	2	2	2
1562	2	3	7	1	2	1	1	Professional rank	5	2	98	4	5	5	5	2	2	2	98	1	4	1	7	2	1	.	1	1	1	1	1	1	1	1	1	1	1	1	1	1	1	1	1	2	2	2	2	2	2
1563	1	3	7	1	2	2	1	Professional rank	5	2	98	4	4	4	5	2	2	2	98	1	4	1	10	4	1	1	1	1	1	1	1	1	1	1	1	1	1	1	1	1	1	1	5	1	1	2	2	2	2
1564	2	3	9	1	1	2	1	Professional rank	7	1	1	4	4	5	5	2	2	2	98	1	4	1	10	4	1	1	1	1	1	1	1	1	1	1	1	1	1	1	1	1	1	1	4	1	1	2	2	2	2
1565	2	3	8	2	2	1	1	Administrative Rank	4	2	98	3	5	5	5	2	2	2	98	1	1	1	7	2	1	1	1	1	1	1	1	1	1	1	1	1	1	1	1	1	1	1	4	1	1	1	1	1	1
1566	2	2	9	1	1	1	1	Administrative Rank	7	2	98	4	4	4	4	2	2	2	98	1	3	1	10	4	0	1	1	1	1	1	1	1	1	1	1	1	1	1	1	1	1	1	4	2	2	2	2	2	2
1568	2	3	9	1	1	1	1	Trader/Artisans/Business	7	2	98	4	3	2	4	1	2	2	2	2	4	1	7	2	0	1	.	.	.	.	.	.	0	.	.	.	.	.	.	.	.	.	1	1	2	2	2	2	2
1569	1	6	7	2	2	1	2	Trader/Artisans/Business	7	1	98	3	4	4	4	1	2	2	2	1	4	1	10	4	0	1	1	1	1	1	1	1	1	1	1	1	1	1	1	1	1	1	1	1	1	2	2	2	2
1571	1	2	5	2	1	1	5	Trader/Artisans/Business	1	2	98	3	4	4	4	2	2	2	98	1	3	1	10	4	1	.	1	1	1	1	1	1	1	1	1	1	1	1	1	1	1	1	1	1	1	2	2	2	2
1572	1	1	6	1	1	1	5	Trader/Artisans/Business	1	2	98	4	5	5	4	2	1	2	98	1	3	1	10	4	0	.	1	1	1	1	1	1	1	1	1	1	1	1	1	1	1	1	2	1	1	2	2	2	2
1575	1	3	6	2	1	1	6	Administrative Rank	7	2	98	3	4	4	5	1	2	2	2	1	2	1	10	4	0	.	1	1	1	1	1	1	1	1	1	1	1	1	1	1	1	1	4	2	1	2	2	2	2
1578	2	3	7	1	1	1	1	Administrative Rank	3	2	98	3	4	4	5	2	2	2	98	2	4	1	10	4	1	1	1	1	1	1	1	1	1	1	1	1	1	1	1	1	1	1	4	1	1	2	2	2	2
1579	1	3	8	2	1	1	4	Administrative Rank	5	2	98	3	4	4	3	2	2	2	98	1	2	1	10	4	1	1	1	1	1	1	1	1	1	1	1	1	1	1	1	1	1	1	5	1	1	1	1	1	1
1582	1	2	6	1	1	1	3	Teaching/Academic Rank	2	1	1	3	5	5	5	2	2	2	98	1	1	1	10	4	0	.	.	.	.	.	.	.	0	.	.	.	.	.	.	.	.	.	5	2	2	2	2	2	2
1583	2	3	7	2	2	1	6	Trader/Artisans/Business	2	2	98	4	5	5	3	2	2	2	98	1	4	1	10	4	1	1	1	1	1	1	1	1	1	1	1	1	1	1	1	1	1	1	4	1	1	2	2	2	2
1584	2	2	7	2	1	2	5	Trader/Artisans/Business	7	2	98	3	5	5	4	2	2	2	98	1	2	1	7	2	1	1	.	.	.	.	.	.	0	.	.	.	.	.	.	.	.	.	5	1	1	2	2	2	2
1586	2	2	7	4	1	1	5	Teaching/Academic Rank	7	2	98	3	5	5	4	2	2	2	98	1	2	1	7	2	1	1	.	.	.	.	.	.	0	.	.	.	.	.	.	.	.	.	5	1	1	2	2	2	2
1588	2	3	8	2	2	1	1	Teaching/Academic Rank	4	2	98	3	3	4	5	2	2	2	98	1	3	1	10	4	1	1	1	1	1	1	1	1	1	1	1	1	1	1	1	1	1	1	3	1	1	2	2	2	2
1589	2	3	7	1	1	1	4	Trader/Artisans/Business	2	2	98	3	3	3	3	1	2	2	2	1	1	1	10	4	1	1	1	1	1	1	1	1	1	1	1	1	1	1	1	1	1	1	4	1	1	2	2	2	2
1592	1	3	8	4	1	1	2	Teaching/Academic Rank	7	1	1	4	4	4	5	2	2	2	98	1	4	1	10	4	0	.	.	.	.	.	.	.	0	.	.	.	.	.	.	.	.	.	5	2	1	2	2	2	2
1593	2	2	7	4	1	1	5	Trader/Artisans/Business	7	1	3	2	3	4	5	2	2	2	98	1	3	1	10	4	1	.	1	1	1	1	1	1	1	1	1	1	1	1	1	1	1	1	5	2	1	2	2	2	2
1594	2	1	7	2	1	1	6	Teaching/Academic Rank	4	1	1	3	3	3	4	1	2	2	2	1	1	1	1	1	0	.	.	.	.	.	.	.	0	.	.	.	.	.	.	.	.	.	5	2	1	3	3	3	3
1596	1	3	8	3	1	2	1	Professional rank	7	2	98	3	3	4	1	1	2	2	2	1	6	1	10	4	1	1	.	.	.	.	.	.	0	.	.	.	.	.	.	.	.	.	1	3	3	2	2	2	2
1597	1	2	7	1	1	2	5	Administrative Rank	1	2	98	3	3	3	4	2	2	2	98	1	4	1	10	4	0	1	1	1	1	1	1	1	1	1	1	1	1	1	1	1	1	1	4	2	1	2	2	2	2
1598	1	3	7	1	2	1	4	Trader/Artisans/Business	5	2	98	3	4	5	5	1	2	2	2	1	4	1	10	4	1	1	.	.	.	.	.	.	0	.	.	.	.	.	.	.	.	.	5	3	3	2	2	2	2
1599	2	3	8	1	1	1	5	Teaching/Academic Rank	2	1	1	3	4	5	5	2	2	2	98	1	1	1	1	1	0	1	1	1	1	1	1	1	1	1	1	1	1	1	1	1	1	1	4	1	1	2	2	2	2
1613	1	3	6	2	1	1	4	Trader/Artisans/Business	5	2	98	3	4	4	3	2	2	2	98	2	4	1	7	2	0	1	.	.	.	.	.	.	0	.	.	.	.	.	.	.	.	.	4	2	2	2	2	2	2
1614	1	5	10	2	2	1	2	Trader/Artisans/Business	5	2	98	3	4	3	3	1	2	1	2	1	2	1	10	4	1	1	1	1	1	1	1	1	1	1	1	1	1	1	1	1	1	1	5	1	1	1	1	1	1
1615	1	2	6	2	1	1	6	Administrative Rank	3	2	98	3	4	5	1	2	2	2	98	1	3	1	10	4	0	.	.	.	.	.	.	.	0	.	.	.	.	.	.	.	.	.	5	3	3	3	3	3	3
1617	2	2	8	1	1	1	6	Administrative Rank	1	2	98	3	4	5	2	2	1	1	98	1	4	1	10	4	1	1	1	1	1	1	1	1	1	1	1	1	1	1	1	1	1	1	4	1	1	2	2	2	2
1619	2	5	6	1	2	1	1	Trader/Artisans/Business	5	2	98	3	5	5	5	2	2	1	98	2	4	1	10	4	0	.	1	1	1	1	1	1	1	1	1	1	1	1	1	1	1	1	5	1	3	2	2	2	2
1622	1	3	7	2	2	1	1	Administrative Rank	3	1	3	2	3	3	3	1	1	1	2	1	4	1	10	4	1	1	1	1	1	1	1	1	1	1	1	1	1	1	1	1	1	1	4	2	1	2	2	2	2
1623	1	6	7	2	2	1	1	Administrative Rank	4	1	3	3	4	4	2	1	2	2	2	1	4	1	1	1	1	1	1	1	1	1	1	1	1	1	1	1	1	1	1	1	1	1	4	1	1	2	2	2	2
1624	1	3	7	2	2	1	1	Administrative Rank	4	1	3	3	4	4	2	1	2	2	2	1	4	1	1	1	1	1	1	1	1	1	1	1	1	1	1	1	1	1	1	1	1	1	4	1	1	2	2	2	2
1627	2	3	8	1	2	1	1	Trader/Artisans/Business	3	1	3	3	4	4	3	1	1	1	2	1	4	1	10	4	1	1	1	1	1	1	1	1	1	1	1	1	1	1	1	1	1	1	4	2	1	2	2	2	2
1632	2	3	3	1	5	1	4	Teaching/Academic Rank	2	1	1	3	4	4	5	1	1	1	2	1	4	1	10	4	1	1	1	1	1	1	1	1	1	1	1	1	1	1	1	1	1	1	4	2	1	1	1	1	1
1634	1	3	7	1	1	1	2	Teaching/Academic Rank	5	1	1	4	4	5	3	2	2	2	98	1	1	1	10	4	1	.	1	1	1	1	1	1	1	1	1	1	1	1	1	1	1	1	1	1	2	2	2	2	2
1635	2	6	6	2	1	1	4	Clergy Rank	7	2	98	4	5	5	4	2	1	1	98	1	2	1	10	4	1	1	1	1	1	1	1	1	1	1	1	1	1	1	1	1	1	1	5	2	1	2	2	2	2
1636	1	3	7	1	2	1	1	Professional rank	2	1	3	3	4	4	2	2	1	2	98	1	4	1	10	4	1	1	1	1	1	1	1	1	1	1	1	1	1	1	1	1	1	1	4	1	1	2	2	2	2
1637	1	2	8	2	1	1	4	Professional rank	1	2	98	3	5	4	4	1	2	2	2	1	4	1	10	4	1	1	.	.	.	.	.	.	0	.	.	.	.	.	.	.	.	.	1	3	3	2	2	2	2
1642	1	3	8	1	1	1	6	Trader/Artisans/Business	5	2	98	4	3	3	4	2	2	2	98	1	4	1	10	4	1	1	1	1	1	1	1	1	1	1	1	1	1	1	1	1	1	1	5	1	1	2	2	2	2
1643	1	4	8	1	2	1	2	Teaching/Academic Rank	7	2	98	3	5	5	5	2	2	2	98	1	4	1	10	4	1	1	1	1	1	1	1	1	1	1	1	1	1	1	1	1	1	1	3	1	1	2	2	2	2
1646	2	3	8	2	2	1	2	Trader/Artisans/Business	6	2	98	4	5	5	3	2	2	2	98	1	4	1	10	4	1	1	1	1	1	1	1	1	1	1	1	1	1	1	1	1	1	1	5	2	2	2	2	2	2
1647	2	2	7	1	1	2	3	Teaching/Academic Rank	3	1	1	4	4	4	4	2	2	2	98	1	2	1	10	4	0	1	1	1	1	1	1	1	1	1	1	1	1	1	1	1	1	1	3	2	2	2	2	2	2
1649	1	1	6	2	1	1	5	Teaching/Academic Rank	7	2	98	3	4	4	3	2	2	1	98	1	2	1	7	2	0	.	1	1	1	1	1	1	1	1	1	1	1	1	1	1	1	1	4	2	2	2	2	2	2
1650	1	6	10	2	2	1	4	Professional rank	7	2	98	2	3	5	4	2	1	2	98	1	2	1	1	1	1	1	1	1	1	1	1	1	1	1	1	1	1	1	1	1	1	1	1	1	1	1	1	1	1
1651	1	2	8	1	1	1	5	Professional rank	7	2	98	4	5	5	5	2	2	2	98	1	1	1	10	4	0	1	1	1	1	1	1	1	1	1	1	1	1	1	1	1	1	1	5	1	3	2	2	2	2
1652	2	3	3	2	2	1	3	Administrative Rank	1	1	1	2	3	3	3	1	1	1	2	1	4	1	10	4	1	1	1	1	1	1	1	1	1	1	1	1	1	1	1	1	1	1	4	2	3	1	1	1	1
1655	1	3	8	1	1	1	1	Administrative Rank	7	1	1	4	5	4	4	2	2	2	98	1	2	1	1	1	1	1	.	.	.	.	.	.	0	.	.	.	.	.	.	.	.	.	4	2	1	2	2	2	2
1656	1	3	7	2	1	2	6	Administrative Rank	1	2	98	3	3	3	3	1	1	2	2	1	4	1	10	4	1	1	1	1	1	1	1	1	1	1	1	1	1	1	1	1	1	1	2	1	1	2	2	2	2
1664	2	2	8	4	1	1	6	Administrative Rank	7	2	98	4	5	5	3	2	2	2	98	1	4	1	10	4	0	.	1	1	1	1	1	1	1	1	1	1	1	1	1	1	1	1	3	1	1	2	2	2	2
1665	2	3	7	4	1	1	1	Administrative Rank	3	2	98	3	3	3	3	1	2	2	2	1	3	1	10	4	1	1	1	1	1	1	1	1	1	1	1	1	1	1	1	1	1	1	5	1	1	2	2	2	2
1666	1	3	8	2	1	1	4	Administrative Rank	1	1	1	3	4	4	4	2	2	2	98	1	3	1	7	2	1	1	1	1	1	1	1	1	1	1	1	1	1	1	1	1	1	1	5	2	2	2	2	2	2
1670	1	1	5	2	1	1	5	Trader/Artisans/Business	7	2	98	4	5	3	4	2	2	2	98	1	1	1	7	2	1	1	1	1	1	1	1	1	1	1	1	1	1	1	1	1	1	1	4	2	2	2	2	2	2
1671	1	3	8	2	1	1	1	Trader/Artisans/Business	6	2	98	3	4	5	4	1	1	2	2	1	3	1	10	4	1	1	1	1	1	1	1	1	1	1	1	1	1	1	1	1	1	1	3	1	1	2	2	2	2
1672	1	2	8	2	1	1	4	Teaching/Academic Rank	4	1	1	3	4	3	5	2	2	2	98	1	1	1	10	4	0	1	1	1	1	1	1	1	1	1	1	1	1	1	1	1	1	1	5	1	2	2	2	2	2
1673	1	2	6	1	1	1	6	Trader/Artisans/Business	4	2	98	4	5	5	3	2	2	2	98	1	1	1	7	2	1	1	1	1	1	1	1	1	1	1	1	1	1	1	1	1	1	1	5	2	2	2	2	2	2
1674	1	6	3	1	1	1	5	Teaching/Academic Rank	7	2	98	2	3	3	5	1	1	2	2	2	4	1	10	4	0	1	.	.	.	.	.	.	0	.	.	.	.	.	.	.	.	.	5	1	1	2	2	2	2
1677	1	3	8	4	1	1	2	Administrative Rank	7	1	98	3	5	4	4	2	2	1	98	1	4	1	10	4	0	.	1	1	1	1	1	1	1	1	1	1	1	1	1	1	1	1	4	2	2	2	2	2	2
1681	2	5	6	1	2	1	1	Administrative Rank	4	2	98	3	4	4	4	2	2	2	98	1	2	1	1	2	0	.	1	1	1	1	1	1	1	1	1	1	1	1	1	1	1	1	5	1	1	2	2	2	2
1684	2	2	7	1	1	1	5	Administrative Rank	7	1	1	3	4	4	2	2	2	1	98	1	1	1	1	2	1	.	1	1	1	1	1	1	1	1	1	1	1	1	1	1	1	1	5	1	2	2	2	2	2
1685	2	2	9	2	1	1	6	Trader/Artisans/Business	7	2	98	4	5	5	5	2	2	2	98	1	1	1	2	1	1	.	1	1	1	1	1	1	1	1	1	1	1	1	1	1	1	1	4	1	1	2	2	2	2
1691	2	2	7	1	1	1	5	Professional rank	7	2	98	4	4	5	1	2	2	2	98	1	1	1	1	1	1	1	.	.	.	.	.	.	0	.	.	.	.	.	.	.	.	.	1	2	1	2	2	2	2
1692	1	1	5	1	1	1	5	Administrative Rank	7	2	98	2	5	4	5	2	2	2	98	1	3	1	2	2	0	.	1	1	1	1	1	1	1	1	1	1	1	1	1	1	1	1	5	2	1	2	2	2	2
1693	2	3	8	2	2	1	1	Administrative Rank	5	2	98	2	3	3	5	2	2	2	98	1	6	1	2	2	1	1	1	1	1	1	1	1	1	1	1	1	1	1	1	1	1	1	4	1	1	2	2	2	2
1694	1	6	8	1	1	1	6	Administrative Rank	1	2	98	2	3	3	2	2	2	1	98	1	4	1	10	4	0	.	.	.	.	.	.	.	0	.	1	.	.	.	.	.	.	.	4	2	1	2	2	2	2
1695	2	4	7	1	1	1	1	Administrative Rank	2	1	1	3	4	4	5	2	2	2	98	1	3	1	10	4	0	.	1	1	1	1	1	1	1	1	1	1	1	1	1	1	1	1	4	1	1	2	2	2	2
1696	1	2	7	1	1	1	1	Administrative Rank	2	2	98	3	4	4	5	2	2	2	98	1	1	1	10	4	1	1	1	1	1	1	1	1	1	1	1	1	1	1	1	1	1	1	1	1	1	2	2	2	2
1699	1	3	8	2	1	1	4	Administrative Rank	7	2	98	3	5	5	5	2	2	2	98	1	3	1	1	2	0	1	1	1	1	1	1	1	1	1	1	1	1	1	1	1	1	1	3	2	2	2	2	2	2
1700	2	2	7	1	1	2	1	Teaching/Academic Rank	4	2	98	3	3	3	5	2	2	2	98	1	6	1	10	4	0	.	1	1	1	1	1	1	1	1	1	1	1	1	1	1	1	1	5	2	2	2	2	2	2
1702	1	6	9	1	1	2	6	Teaching/Academic Rank	7	1	98	3	2	4	2	1	2	2	2	1	3	1	10	4	0	1	1	1	1	1	1	1	1	1	1	1	1	1	1	1	1	1	5	2	1	2	2	2	2
1703	2	3	8	2	1	1	2	Administrative Rank	5	2	98	3	3	3	5	2	2	2	98	1	4	1	10	4	0	1	1	1	1	1	1	1	1	1	1	1	1	1	1	1	1	1	3	2	2	2	2	2	2
1712	1	2	10	2	2	1	1	Administrative Rank	4	1	3	3	4	4	2	1	2	2	2	1	4	1	9	1	1	1	1	1	1	1	1	1	1	1	1	1	1	1	1	1	1	1	4	1	1	2	2	2	2
1725	2	2	8	1	1	1	5	Professional rank	1	2	98	3	4	5	4	1	1	2	2	1	6	1	10	4	0	1	1	1	1	1	1	1	1	1	1	1	1	1	1	1	1	1	4	2	1	2	2	2	2
1727	1	2	8	1	1	1	1	Administrative Rank	2	2	98	4	4	5	4	1	2	2	2	1	6	1	10	4	1	.	.	.	.	.	.	.	0	.	.	.	.	.	.	.	.	.	4	3	3	2	2	2	2
1731	2	3	9	3	2	2	2	Teaching/Academic Rank	7	1	1	3	4	5	4	1	2	2	2	1	6	1	10	4	1	1	1	1	1	1	1	1	1	1	1	1	1	1	1	1	1	1	1	2	2	2	2	2	2
1733	1	1	6	2	1	1	4	Teaching/Academic Rank	3	2	98	3	4	4	4	1	2	2	2	1	6	1	10	4	1	1	.	.	.	.	.	.	0	.	.	.	.	.	.	.	.	.	4	2	2	2	2	2	2
1735	2	2	7	3	1	2	5	Professional rank	2	2	98	3	4	5	5	1	2	2	2	1	6	1	10	4	1	1	.	.	.	.	.	.	0	.	1	.	.	.	.	.	.	.	5	2	2	2	2	2	2
1736	1	3	6	1	1	1	4	Professional rank	6	2	98	2	4	5	4	1	2	1	2	1	6	1	10	4	1	1	.	.	.	.	.	.	0	.	1	.	.	.	.	.	.	.	5	3	3	2	2	2	2
1737	2	3	6	1	2	1	4	Administrative Rank	6	1	3	3	4	5	4	1	1	1	3	1	1	1	10	4	1	1	1	1	1	1	1	1	1	1	1	1	1	1	1	1	1	1	4	1	1	2	2	2	2
1738	2	3	8	1	2	1	2	Administrative Rank	5	2	98	3	4	5	4	2	2	2	98	1	4	1	10	4	1	1	1	1	1	1	1	1	1	1	1	1	1	1	1	1	1	1	4	1	1	2	2	2	2
1742	2	1	7	1	1	1	1	Teaching/Academic Rank	1	2	98	4	4	4	4	2	2	2	98	1	5	1	9	1	0	.	.	.	.	.	.	.	0	.	1	.	.	.	.	.	.	.	5	2	2	2	2	2	2
1743	1	4	10	1	2	1	3	Trader/Artisans/Business	7	1	1	4	5	4	4	2	2	2	98	1	5	1	10	4	1	1	1	1	1	1	1	1	1	1	1	1	1	1	1	1	1	1	5	1	1	2	2	2	2
1744	1	6	6	2	1	1	4	Teaching/Academic Rank	7	2	98	4	5	4	4	2	1	2	98	2	5	1	10	4	0	.	1	1	1	1	1	1	1	1	1	1	1	1	1	1	1	1	5	2	2	2	2	2	2
1746	1	4	6	1	2	1	4	Teaching/Academic Rank	2	2	98	2	5	5	3	2	2	2	98	1	4	1	10	4	0	.	.	.	.	.	.	.	0	.	.	.	.	.	.	.	.	.	5	2	2	2	2	2	2
1747	2	3	9	2	1	1	5	Trader/Artisans/Business	7	2	98	4	4	5	1	2	2	1	98	1	6	1	10	4	1	1	1	1	1	1	1	1	1	1	1	1	1	1	1	1	1	1	4	1	1	2	2	2	2
1748	2	2	6	1	1	1	1	Teaching/Academic Rank	2	2	98	3	3	3	3	2	2	2	98	1	3	1	4	1	1	1	1	1	1	1	1	1	1	1	1	1	1	1	1	1	1	1	3	1	1	2	2	2	2
1749	2	2	7	1	1	1	5	Trader/Artisans/Business	7	2	98	3	3	3	4	1	2	2	2	1	6	1	10	4	1	1	1	1	1	1	1	1	1	1	1	1	1	1	1	1	1	1	3	2	1	2	2	2	2
1750	2	3	7	2	1	1	1	Teaching/Academic Rank	4	2	98	3	3	3	4	2	2	2	98	1	2	1	4	1	0	.	1	1	1	1	1	1	1	1	1	1	1	1	1	1	1	1	5	1	1	2	2	2	2
1751	1	3	8	2	1	1	3	Trader/Artisans/Business	5	2	98	3	3	3	4	2	2	2	98	1	5	1	10	4	1	1	1	1	1	1	1	1	1	1	1	1	1	1	1	1	1	1	5	2	2	2	2	2	2
1753	2	2	6	2	1	1	5	Trader/Artisans/Business	7	2	98	3	4	4	3	2	2	2	98	1	1	1	10	4	0	.	.	.	.	.	.	.	0	.	.	.	.	.	.	.	.	.	5	2	2	2	2	2	2
1758	2	2	6	2	1	1	5	Trader/Artisans/Business	2	2	98	3	3	4	4	1	2	2	2	1	4	1	10	4	1	1	.	.	.	.	.	.	0	.	.	.	.	.	.	.	.	.	5	2	2	2	2	2	2
1759	2	2	6	2	1	1	5	Teaching/Academic Rank	2	2	98	3	3	4	4	1	2	2	2	1	4	1	10	4	1	1	.	.	.	.	.	.	0	.	.	.	.	.	.	.	.	.	5	2	2	2	2	2	2
1761	1	2	7	2	1	1	5	Administrative Rank	7	2	98	3	4	4	2	2	2	2	98	1	1	1	7	2	0	1	.	.	.	.	.	.	0	.	1	.	.	.	.	.	.	.	4	2	1	1	1	1	1
1762	2	2	7	2	1	1	5	Trader/Artisans/Business	7	2	98	3	4	4	4	1	2	1	2	1	3	1	10	4	0	.	.	.	.	.	.	.	0	.	1	.	.	.	.	.	.	.	5	3	3	3	3	3	3
1765	1	4	6	4	1	1	4	Professional rank	1	2	98	2	5	5	4	2	1	1	98	1	4	1	10	4	0	.	.	.	.	.	.	.	0	.	.	.	.	.	.	.	.	.	5	1	3	2	2	2	2
1767	1	3	7	1	1	2	5	Professional rank	7	2	98	4	5	5	4	2	2	2	98	1	2	1	4	2	0	1	.	.	.	.	.	.	0	.	1	.	.	.	.	.	.	.	5	2	2	2	2	2	2
1768	1	6	8	1	1	2	5	Professional rank	1	2	98	3	5	4	5	2	2	2	98	1	4	1	10	4	1	1	1	1	1	1	1	1	1	1	1	1	1	1	1	1	1	1	5	1	1	2	2	2	2
1769	1	3	8	2	1	1	5	Teaching/Academic Rank	7	2	98	4	4	4	4	1	2	2	2	1	1	1	4	1	0	.	1	1	1	1	1	1	1	1	1	1	1	1	1	1	1	1	3	1	1	2	2	2	2
1770	2	2	7	2	1	1	5	Teaching/Academic Rank	7	2	98	3	3	3	4	2	2	2	98	1	4	1	10	4	1	1	1	1	1	1	1	1	1	1	1	1	1	1	1	1	1	1	4	1	1	2	2	2	2
1771	2	4	8	2	2	2	4	Teaching/Academic Rank	7	2	98	4	4	4	4	2	2	2	98	1	4	1	10	4	1	1	1	1	1	1	1	1	1	1	1	1	1	1	1	1	1	1	3	1	1	2	2	2	2
1773	1	6	8	1	2	1	1	Teaching/Academic Rank	7	2	98	4	3	3	5	2	2	2	98	1	2	1	10	4	1	.	1	1	1	1	1	1	1	1	1	1	1	1	1	1	1	1	2	1	2	2	2	2	2
1778	2	3	8	3	2	2	1	Teaching/Academic Rank	5	2	98	3	4	5	5	1	2	2	2	1	6	1	10	4	1	1	.	.	.	.	.	.	0	.	.	.	.	.	.	.	.	.	1	2	2	2	2	2	2
1783	2	5	8	1	2	1	1	Administrative Rank	7	2	98	4	4	4	2	2	2	2	98	1	4	1	10	4	1	1	1	1	1	1	1	1	1	1	1	1	1	1	1	1	1	1	5	1	1	2	2	2	2
1785	1	4	8	1	2	1	6	Teaching/Academic Rank	6	2	98	4	3	3	4	2	2	2	98	1	4	1	3	1	1	1	1	1	1	1	1	1	1	1	1	1	1	1	1	1	1	1	3	1	1	2	2	2	2
1787	1	3	8	1	1	1	6	Trader/Artisans/Business	5	2	98	3	3	3	4	2	2	2	98	1	3	1	10	4	1	1	1	1	1	1	1	1	1	1	1	1	1	1	1	1	1	1	5	1	1	2	2	2	2
1800	1	6	8	2	1	1	3	Administrative Rank	7	1	98	3	4	4	4	2	2	2	98	1	1	1	2	1	1	1	1	1	1	1	1	1	1	1	1	1	1	1	1	1	1	1	4	2	2	2	2	2	2
0456	1	3	7	2	2	1	1	Administrative Rank	5	1	1	3	4	4	2	2	2	2	98	1	1	1	8	3	1	1	1	1	1	1	1	1	1	1	1	1	1	1	1	1	1	1	1	2	2	2	2	2	2
0457	2	2	6	1	1	2	1	Administrative Rank	3	2	98	3	5	5	5	2	2	2	98	1	1	1	10	4	1	1	.	.	.	.	.	.	0	.	.	.	.	.	.	.	.	.	2	2	2	2	2	2	1
0459	2	4	10	1	2	1	2	Administrative Rank	7	1	1	3	5	5	5	2	1	1	98	1	4	1	8	3	1	1	1	1	1	1	1	1	1	1	1	1	1	1	1	1	1	1	4	1	1	2	2	2	2
0462	2	2	6	2	2	1	6	Administrative Rank	5	2	98	3	3	3	4	1	1	1	2	2	6	1	10	4	1	1	1	1	1	1	1	1	1	1	1	1	1	1	1	1	1	1	2	2	2	2	2	2	2
0463	1	3	7	1	1	1	3	Teaching/Academic Rank	2	2	98	3	4	4	3	1	1	1	2	1	6	1	10	4	1	1	1	1	1	1	1	1	1	1	1	1	1	1	1	1	1	1	4	2	2	2	2	2	2
0464	2	3	8	2	1	1	4	Teaching/Academic Rank	6	1	1	3	5	4	5	2	2	2	98	1	1	1	8	3	1	1	.	1	1	1	1	1	1	1	.	.	.	.	.	.	.	.	2	1	1	3	3	3	3
0465	2	2	8	2	1	1	5	Teaching/Academic Rank	3	2	98	4	5	5	5	1	2	1	2	1	4	1	10	4	1	1	.	1	1	1	1	1	1	1	.	.	.	.	.	.	.	.	2	1	1	2	2	2	2
0466	1	3	7	2	1	1	4	Administrative Rank	2	2	98	3	4	4	4	2	2	2	98	1	3	1	8	2	0	1	1	1	1	1	1	1	1	1	1	1	1	1	1	1	1	1	2	1	1	2	2	2	1
0467	1	4	6	2	2	1	6	Administrative Rank	3	2	98	3	4	4	4	2	2	2	98	1	4	1	10	4	1	1	1	1	1	1	1	1	1	1	1	1	1	1	1	1	1	1	2	2	2	2	2	2	2
0468	1	2	6	1	1	2	5	Trader/Artisans/Business	5	2	98	4	5	5	5	2	2	2	98	1	2	1	8	3	1	.	1	1	1	1	1	1	1	1	1	1	1	1	1	1	1	1	2	1	1	2	2	2	1
0469	1	3	9	1	2	1	1	Trader/Artisans/Business	7	2	98	4	5	5	5	2	2	2	98	1	2	1	8	3	1	1	1	1	1	1	1	1	1	1	1	1	1	1	1	1	1	1	4	1	1	2	2	2	1
0470	2	3	7	2	2	1	2	Trader/Artisans/Business	6	2	98	4	5	5	5	2	2	2	98	1	2	1	1	3	1	.	1	1	1	1	1	1	1	1	1	1	1	1	1	1	1	1	1	1	1	2	2	2	2
0471	1	3	8	1	2	3	1	Professional rank	4	2	98	3	4	4	5	2	2	2	98	1	3	1	1	3	0	1	1	1	1	1	1	1	1	1	1	1	1	1	1	1	1	1	1	1	1	2	2	2	1
0472	1	2	7	1	1	2	5	Professional rank	1	2	98	4	5	5	5	2	2	2	98	2	4	1	1	2	1	1	1	1	1	1	1	1	1	1	1	1	1	1	1	1	1	1	4	2	2	2	2	2	2
0473	1	4	8	2	5	2	2	Administrative Rank	7	2	98	2	3	3	2	1	2	1	2	1	4	1	1	3	1	1	1	1	1	1	1	1	1	1	1	1	1	1	1	1	1	1	2	1	1	1	1	1	1
0474	2	4	8	2	5	2	2	Administrative Rank	7	2	98	2	3	3	2	1	2	1	3	1	4	1	1	3	1	1	1	1	1	1	1	1	1	1	1	1	1	1	1	1	1	1	2	1	1	1	1	1	1
0475	1	3	8	2	1	1	5	Administrative Rank	1	2	98	3	4	4	5	1	2	2	2	1	3	1	1	1	0	1	1	1	1	1	1	1	1	1	1	1	1	1	1	1	1	1	4	2	1	2	2	2	1
0476	2	2	6	2	1	1	4	Trader/Artisans/Business	1	2	98	3	3	4	4	2	2	2	98	1	2	1	10	4	0	1	1	1	1	1	1	1	1	1	1	1	1	1	1	1	1	1	4	1	1	2	2	2	2
0477	1	3	7	1	1	1	5	Trader/Artisans/Business	1	2	98	3	4	4	5	2	2	2	98	2	2	1	10	4	0	1	.	1	1	1	1	1	1	1	1	1	1	1	1	1	1	1	2	3	3	3	3	3	3
0479	2	3	9	4	2	1	1	Trader/Artisans/Business	3	2	98	4	5	5	5	2	2	2	98	1	2	1	4	3	0	1	.	.	.	.	.	.	0	.	.	.	.	.	.	.	.	.	1	1	1	2	2	2	2
0481	1	3	8	2	2	1	5	Trader/Artisans/Business	1	2	98	3	4	4	5	1	2	2	2	1	3	1	1	1	0	1	1	1	1	1	1	1	1	1	1	1	1	1	1	1	1	1	4	2	1	2	2	2	2
0482	1	4	8	1	2	2	1	Teaching/Academic Rank	7	2	98	4	5	5	5	1	2	2	2	1	4	1	4	3	0	1	1	1	1	1	1	1	1	1	1	1	1	1	1	1	1	1	4	2	2	2	2	2	1
0483	1	4	7	2	2	1	2	Trader/Artisans/Business	6	2	98	4	5	5	5	2	2	2	98	1	2	1	4	3	1	1	1	1	1	1	1	1	1	1	1	1	1	1	1	1	1	1	1	1	1	2	2	2	1
0485	1	4	8	1	2	1	1	Trader/Artisans/Business	5	1	1	4	5	5	5	2	2	2	98	1	4	1	3	3	1	1	1	1	1	1	1	1	1	1	1	1	1	1	1	1	1	1	1	1	1	2	2	2	1
0486	1	5	7	1	1	1	3	Teaching/Academic Rank	5	2	98	3	4	4	5	1	2	2	2	1	2	1	3	3	1	1	1	1	1	1	1	1	1	1	1	1	1	1	1	1	1	1	1	2	1	2	2	2	1
0488	1	3	7	1	1	1	3	Teaching/Academic Rank	3	2	98	3	4	4	3	1	1	1	2	1	1	1	10	4	0	.	1	1	1	1	1	1	1	1	1	1	1	1	1	1	1	1	4	2	2	2	2	2	2
0489	1	4	7	2	2	1	1	Trader/Artisans/Business	3	1	98	4	4	4	5	2	2	2	98	1	4	1	3	3	1	1	1	1	1	1	1	1	1	1	1	1	1	1	1	1	1	1	1	1	1	2	2	2	1
0490	2	2	6	1	1	4	3	Teaching/Academic Rank	2	2	98	3	4	4	5	2	2	1	98	1	4	1	3	3	1	1	1	1	1	1	1	1	1	1	1	1	1	1	1	1	1	1	1	1	1	2	2	2	2
0491	1	3	8	1	1	1	6	Trader/Artisans/Business	7	1	1	4	5	5	5	2	2	2	98	1	2	1	10	4	0	.	1	1	1	1	1	1	1	1	1	1	1	1	1	1	1	1	5	2	1	2	2	2	1
0492	2	2	8	1	1	1	1	Professional rank	3	2	98	3	4	4	4	1	1	1	2	1	1	1	3	3	0	1	1	1	1	1	1	1	1	1	1	1	1	1	1	1	1	1	1	2	1	2	2	2	2
0493	2	3	9	1	1	1	3	Administrative Rank	1	1	1	3	3	3	98	1	2	1	2	1	2	1	2	3	1	1	1	1	1	1	1	1	1	1	1	1	1	1	1	1	1	1	5	2	2	2	2	2	2
0494	2	3	7	1	2	2	3	Trader/Artisans/Business	1	2	98	3	4	4	5	1	2	1	3	1	6	1	10	4	0	1	1	1	1	1	1	1	1	1	1	1	1	1	1	1	1	1	5	2	2	2	2	2	2
0495	1	2	8	3	1	2	5	Teaching/Academic Rank	1	2	98	3	3	3	2	2	2	1	98	1	3	1	2	3	1	1	1	1	1	1	1	1	1	1	1	1	1	1	1	1	1	1	5	2	1	2	2	2	2
0496	1	3	7	2	1	1	1	Professional rank	6	2	98	4	5	5	4	2	2	2	98	1	6	1	10	4	0	.	1	1	1	1	.	.	0	.	.	.	.	.	.	.	.	.	5	3	3	2	2	2	2
0498	2	2	8	2	1	1	5	Administrative Rank	2	2	98	3	4	3	5	2	2	2	98	1	1	1	4	2	0	1	1	1	1	1	1	1	1	1	1	1	1	1	1	1	1	1	2	2	2	2	2	2	2
0500	1	3	7	1	2	4	1	Teaching/Academic Rank	6	2	98	3	5	5	5	2	2	2	98	1	3	1	4	3	0	.	1	1	1	1	1	1	1	1	1	1	1	1	1	1	1	1	4	1	1	2	2	2	2
0503	1	3	7	1	1	1	3	Professional rank	1	2	98	4	5	5	4	2	2	1	98	1	4	1	10	4	0	1	1	1	1	1	1	1	1	1	1	1	1	1	1	1	1	1	4	1	1	2	2	2	2
0504	2	2	8	2	1	1	5	Professional rank	1	2	98	3	3	4	98	2	2	2	98	1	4	1	4	1	0	1	1	1	1	1	1	1	1	1	1	1	1	1	1	1	1	1	1	2	2	2	2	2	2
0505	1	2	6	1	1	1	2	Professional rank	7	2	98	3	3	3	4	2	2	2	98	1	6	1	10	4	0	.	1	1	1	1	1	1	1	1	1	1	1	1	1	1	1	1	4	2	1	2	2	2	2
0506	1	3	7	2	1	1	5	Trader/Artisans/Business	2	1	98	4	5	5	5	2	2	1	98	1	6	1	10	4	1	.	1	1	1	1	1	1	1	1	.	.	.	.	.	.	.	.	1	2	1	2	2	2	2
0507	2	4	8	1	2	1	2	Trader/Artisans/Business	7	2	98	3	5	5	3	2	2	2	98	1	3	1	4	3	1	1	1	1	1	1	1	1	1	1	1	1	1	1	1	1	1	1	4	2	2	2	2	2	2
0508	1	2	8	2	1	1	2	Trader/Artisans/Business	7	1	1	4	5	5	5	2	2	2	98	1	1	1	4	1	0	.	1	.	.	.	.	.	0	.	.	.	.	.	.	.	.	.	4	2	2	2	2	2	2
0509	1	4	7	2	2	1	1	Trader/Artisans/Business	5	2	98	4	5	5	5	2	2	2	98	1	4	1	4	3	1	.	1	1	1	1	1	1	1	1	1	1	1	1	1	1	1	1	1	1	1	2	2	2	2
0510	1	4	9	1	2	4	1	Trader/Artisans/Business	5	2	98	4	5	5	5	2	2	2	98	1	2	1	4	3	1	1	1	1	1	1	1	1	1	1	1	1	1	1	1	1	1	1	4	1	1	3	3	3	3
0511	1	3	3	1	3	2	3	Administrative Rank	7	2	98	3	3	4	2	1	1	1	2	2	6	1	10	4	0	.	1	1	1	1	1	1	1	1	1	1	1	1	1	1	1	1	5	1	1	2	2	2	2
0512	1	3	8	1	1	1	1	Administrative Rank	4	1	1	3	5	4	5	2	2	2	98	1	3	1	4	3	1	1	1	1	1	1	1	1	1	1	1	1	1	1	1	1	1	1	1	1	1	2	2	2	2
0513	1	4	6	2	2	1	4	Administrative Rank	6	2	98	4	4	4	5	2	2	2	98	1	2	1	4	3	1	.	1	1	1	1	1	1	1	1	1	1	1	1	1	1	1	1	5	1	1	2	2	2	2
0514	1	4	6	2	2	1	4	Administrative Rank	6	2	98	4	4	4	5	2	2	2	98	1	2	1	4	3	1	.	1	1	1	1	1	1	1	1	1	1	1	1	1	1	1	1	4	1	1	2	2	2	2
0515	1	3	9	1	1	1	6	Clergy Rank	7	2	98	3	4	3	1	1	1	1	2	1	1	1	4	2	0	1	1	.	.	.	.	.	0	.	.	.	.	.	.	.	.	.	1	2	1	2	2	2	2
0516	2	2	8	1	1	1	1	Professional rank	2	2	98	4	5	4	5	2	2	2	98	1	3	1	4	3	0	.	1	.	.	.	.	.	0	.	.	.	.	.	.	.	.	.	4	2	2	2	2	2	2
0519	2	2	3	2	1	1	3	Administrative Rank	2	1	1	4	5	5	98	1	1	1	2	2	6	1	4	2	0	.	1	1	1	1	1	1	1	1	1	1	1	1	1	1	1	1	4	2	2	2	2	2	2
0520	2	2	8	3	1	2	5	Administrative Rank	1	2	98	3	3	4	3	2	2	2	98	1	3	1	4	3	1	1	1	1	1	1	1	1	1	1	1	1	1	1	1	1	1	1	5	2	1	2	2	2	2
0521	2	4	7	1	2	1	4	Trader/Artisans/Business	1	1	1	3	4	4	5	1	1	1	2	1	3	1	4	2	0	.	1	1	1	1	1	1	1	1	1	1	1	1	1	1	1	1	4	2	2	2	2	2	2
0524	2	2	7	3	2	2	5	Trader/Artisans/Business	1	2	98	3	4	5	4	2	1	1	2	1	2	1	10	4	1	.	.	.	.	.	.	.	0	.	.	.	.	.	.	.	.	.	5	2	1	2	2	2	2
0527	1	2	6	1	1	1	5	Teaching/Academic Rank	1	1	98	3	4	3	4	2	2	2	98	1	3	1	4	1	0	.	.	.	.	.	.	.	0	.	.	.	.	.	.	.	.	.	5	2	2	2	2	2	2
0528	2	2	8	1	1	1	3	Trader/Artisans/Business	5	1	1	4	3	3	5	2	2	2	98	1	3	1	10	4	1	.	1	1	1	1	1	1	1	1	1	1	1	1	1	1	1	1	5	1	2	2	2	2	2
0530	1	2	7	1	1	1	5	Clergy Rank	1	2	98	4	5	3	5	1	1	1	2	1	3	1	4	2	0	.	.	.	.	.	.	.	0	.	.	.	.	.	.	.	.	.	5	2	2	1	1	1	1
0534	1	3	6	1	2	1	3	Administrative Rank	2	2	98	3	4	4	5	2	2	2	98	1	4	1	10	4	1	1	1	1	1	1	1	1	1	1	1	1	1	1	1	1	1	1	1	1	1	2	2	2	2
0535	2	4	7	1	1	1	1	Administrative Rank	1	1	98	4	5	5	5	2	2	2	98	1	6	1	1	2	0	.	1	1	1	1	1	1	1	1	1	1	1	1	1	1	1	1	4	2	2	2	2	2	2
0536	2	3	8	2	1	1	4	Trader/Artisans/Business	6	1	1	3	5	4	5	2	2	2	98	1	1	1	1	3	1	1	.	.	.	.	.	.	0	.	.	.	.	.	.	.	.	.	1	3	3	3	3	3	3
0537	2	3	7	1	2	2	3	Trader/Artisans/Business	1	2	98	3	4	4	5	1	2	1	98	1	6	1	10	4	0	1	1	1	1	1	1	1	1	1	1	1	1	1	1	1	1	1	5	2	2	2	2	2	2
0539	1	4	8	1	2	2	1	Teaching/Academic Rank	7	2	98	4	5	5	5	1	2	2	2	1	4	1	10	4	0	.	1	1	1	1	1	1	1	1	1	1	1	1	1	1	1	1	4	2	2	2	2	2	2
0540	1	2	8	2	1	1	3	Trader/Artisans/Business	1	1	1	3	4	4	5	2	2	2	98	1	3	1	1	2	1	1	1	1	1	1	1	1	1	1	1	1	1	1	1	1	1	1	1	2	2	2	2	2	2
0541	1	3	5	1	2	1	5	Trader/Artisans/Business	1	2	98	3	3	3	5	2	2	2	98	1	4	1	1	1	0	.	1	1	1	1	1	1	1	1	1	1	1	1	1	1	1	1	4	2	1	2	2	2	2
0544	2	3	5	2	2	4	3	Trader/Artisans/Business	1	1	98	1	2	4	98	1	1	1	2	1	6	1	1	2	0	.	1	1	1	1	1	1	1	1	1	1	1	1	1	1	1	1	5	2	2	2	2	2	2
0546	2	3	8	1	1	2	3	Professional rank	1	2	98	3	4	4	4	2	2	2	98	1	3	1	1	2	0	1	1	1	1	1	1	1	1	1	1	1	1	1	1	1	1	1	5	2	2	2	2	2	2
0549	2	3	7	1	1	1	1	Administrative Rank	2	2	98	4	5	5	5	2	2	2	98	1	1	1	10	4	0	.	1	1	1	1	1	1	1	1	1	1	1	1	1	1	1	1	4	2	2	2	2	2	2
0550	2	4	8	1	2	1	1	Administrative Rank	4	2	98	3	3	4	3	2	1	1	2	1	4	1	10	4	1	1	1	1	1	1	1	1	1	1	1	1	1	1	1	1	1	1	4	2	2	2	2	2	2
0551	1	5	10	1	2	1	2	Administrative Rank	7	2	98	4	5	5	5	1	1	1	3	1	4	1	10	4	1	1	.	.	.	.	.	.	0	.	.	.	.	.	.	.	.	.	5	1	1	2	2	2	2
0553	2	3	7	1	2	2	1	Administrative Rank	2	2	98	4	4	4	4	2	2	2	98	1	4	1	4	2	0	.	1	1	1	1	1	1	1	1	1	1	1	1	1	1	1	1	4	2	2	2	2	2	2
0557	2	3	7	1	2	1	1	Administrative Rank	5	2	98	4	5	5	5	1	1	1	2	1	1	1	4	2	1	.	1	1	1	1	1	1	1	1	1	1	1	1	1	1	1	1	1	2	2	2	2	2	2
0559	2	3	6	1	1	1	3	Administrative Rank	1	1	98	3	5	4	98	1	1	1	2	1	1	1	1	1	1	.	1	1	1	1	1	1	1	1	1	1	1	1	1	1	1	1	1	2	2	2	2	2	2
0560	2	1	6	2	1	1	3	Administrative Rank	1	2	98	4	4	4	3	2	2	2	98	1	1	1	4	2	1	.	1	1	1	1	1	1	1	1	1	1	1	1	1	1	1	1	4	2	2	2	2	2	2
0561	2	4	8	1	1	1	1	Administrative Rank	1	2	98	3	4	4	98	1	1	1	2	1	1	1	10	4	1	.	1	1	1	1	1	1	1	1	1	1	1	1	1	1	1	1	4	2	2	2	2	2	2
0563	2	2	8	2	2	1	1	Administrative Rank	3	2	98	4	5	5	5	2	1	1	2	2	6	1	4	2	0	.	1	1	1	1	1	1	1	1	1	1	1	1	1	1	1	1	4	2	2	3	3	3	3
0564	2	2	6	1	1	2	5	Administrative Rank	1	1	98	4	3	4	1	1	2	2	98	1	3	1	8	2	0	.	.	.	.	.	.	.	0	.	.	.	.	.	.	.	.	.	4	1	2	2	2	2	2
0565	1	2	8	1	2	2	4	Administrative Rank	4	2	98	3	4	4	5	1	2	2	98	1	3	1	8	1	0	1	1	1	1	1	1	1	1	1	1	1	1	1	1	1	1	1	4	2	1	2	2	2	1
0567	1	3	7	2	2	1	4	Trader/Artisans/Business	5	2	98	3	3	3	3	2	2	2	98	1	3	1	10	4	0	1	1	1	1	1	1	1	1	1	1	1	1	1	1	1	1	1	4	2	2	2	2	2	2
0568	2	2	8	2	1	1	1	Teaching/Academic Rank	4	2	98	4	3	3	98	2	2	2	98	1	4	1	1	1	0	.	1	1	1	1	1	1	1	1	1	1	1	1	1	1	1	1	5	3	3	3	3	3	3
0569	2	2	7	3	2	1	1	Trader/Artisans/Business	5	1	98	2	3	3	2	1	2	1	98	2	6	1	8	2	0	1	1	1	1	1	1	1	1	1	1	1	1	1	1	1	1	1	5	1	1	2	2	2	1
0573	2	4	7	1	3	2	1	Administrative Rank	5	2	98	3	4	3	5	2	2	2	98	1	1	1	8	1	0	.	1	1	1	1	1	1	1	1	1	1	1	1	1	1	1	1	4	2	2	2	2	2	1
0575	2	2	7	2	1	1	5	Administrative Rank	1	2	98	4	4	3	5	2	2	2	98	1	2	1	5	2	1	.	.	.	.	.	.	.	0	.	.	.	.	.	.	.	.	.	5	3	2	2	2	2	2
0576	2	2	8	2	1	1	5	Administrative Rank	2	2	98	3	4	3	5	2	2	2	98	1	1	1	5	2	0	1	1	1	1	1	1	1	1	1	1	1	1	1	1	1	1	1	2	2	2	2	2	2	3
0577	1	3	7	1	2	4	1	Administrative Rank	6	2	98	3	5	5	5	2	2	2	98	1	3	1	10	4	0	.	1	1	1	1	1	1	1	1	1	1	1	1	1	1	1	1	4	1	1	2	2	2	1
0581	1	4	7	1	2	2	1	Trader/Artisans/Business	4	1	1	4	5	4	4	1	2	1	2	1	4	1	10	4	0	.	1	1	1	1	1	1	1	1	1	1	1	1	1	1	1	1	4	2	2	2	2	2	1
0582	2	2	9	1	2	2	3	Trader/Artisans/Business	3	1	98	3	4	4	4	2	2	2	98	1	2	1	10	4	1	1	1	1	1	1	1	1	1	1	1	1	1	1	1	1	1	1	5	1	1	3	3	3	3
0584	2	3	7	1	1	1	1	Trader/Artisans/Business	3	2	98	3	3	4	5	2	2	2	98	1	1	1	10	4	0	.	.	.	.	.	.	.	0	.	.	.	.	.	.	.	.	.	5	2	2	2	2	2	2
0587	1	2	8	1	1	2	5	Professional rank	2	2	98	4	3	4	4	2	2	2	98	1	3	1	10	4	0	1	1	1	1	1	1	1	1	1	1	1	1	1	1	1	1	1	1	2	2	2	2	2	2
0590	1	2	5	2	1	1	4	Administrative Rank	7	2	98	3	2	5	3	1	2	2	2	1	6	1	10	4	0	.	.	.	.	.	.	.	0	.	.	.	.	.	.	.	.	.	5	1	1	2	2	2	2
0591	2	3	6	2	1	1	4	Administrative Rank	4	2	98	3	2	4	3	1	2	2	2	1	3	1	10	4	0	.	.	.	.	.	.	.	0	.	.	.	.	.	.	.	.	.	5	1	1	2	2	2	2
0593	1	3	8	1	1	2	1	Administrative Rank	5	2	98	2	4	4	4	2	2	2	98	1	1	1	10	4	1	1	1	1	1	1	1	1	1	1	1	1	1	1	1	1	1	1	4	2	1	2	2	2	2
0594	2	5	5	2	2	1	4	Administrative Rank	4	1	1	4	5	5	3	1	1	1	2	1	2	1	10	4	0	.	.	.	.	.	.	.	0	.	.	.	.	.	.	.	.	.	4	2	1	2	2	2	2
0596	2	2	8	1	2	4	1	Trader/Artisans/Business	3	2	98	3	3	4	3	1	1	1	2	1	2	1	10	4	1	1	1	1	1	1	1	1	1	1	1	1	1	1	1	1	1	1	5	2	1	2	2	2	2
0598	1	2	8	2	1	1	5	Trader/Artisans/Business	2	1	1	4	3	3	5	2	2	2	98	1	4	1	10	4	0	1	1	1	1	1	1	1	1	1	1	1	1	1	1	1	1	1	4	2	2	2	2	2	2
0605	1	2	9	1	2	1	2	Administrative Rank	7	1	1	4	5	5	5	2	2	2	98	1	3	1	5	3	1	1	1	1	1	1	1	1	1	1	1	1	1	1	1	1	1	1	3	2	2	2	2	2	2
0606	2	3	8	1	2	1	2	Trader/Artisans/Business	6	1	1	4	5	5	4	1	1	1	2	1	3	1	2	1	1	.	1	1	1	1	1	1	1	1	1	1	1	1	1	1	1	1	3	2	2	2	2	2	2
0608	1	1	5	1	1	4	5	Teaching/Academic Rank	1	1	98	4	5	5	5	2	2	2	98	1	6	1	2	2	1	1	1	1	1	1	1	1	1	1	1	1	1	1	1	1	1	1	3	1	1	2	2	2	2
0609	1	3	7	2	1	4	1	Trader/Artisans/Business	7	1	98	3	5	5	5	2	2	2	98	1	3	1	2	3	1	.	1	1	1	1	1	1	1	1	1	1	1	1	1	1	1	1	4	1	1	2	2	2	2
0611	1	2	6	1	1	2	3	Trader/Artisans/Business	1	1	98	3	4	5	1	1	1	1	2	1	2	1	2	2	1	.	1	1	1	1	1	1	1	1	1	1	1	1	1	1	1	1	3	1	2	2	2	2	2
0612	1	1	5	1	1	1	5	Teaching/Academic Rank	1	1	98	4	4	4	4	2	2	2	98	1	6	1	10	4	1	1	1	1	1	1	1	1	1	1	1	1	1	1	1	1	1	1	3	1	1	3	3	3	3
0618	2	2	8	2	1	1	5	Administrative Rank	2	2	98	3	4	3	5	2	2	2	98	1	1	1	1	2	1	1	1	1	1	1	1	1	1	1	1	1	1	1	1	1	1	1	2	2	2	2	2	2	2
0619	1	3	8	2	2	1	1	Administrative Rank	7	2	98	4	5	5	5	2	2	2	98	1	3	1	6	3	1	1	1	1	1	1	1	1	1	1	1	1	1	1	1	1	1	1	1	2	1	2	2	2	2
0620	2	3	8	2	2	1	1	Administrative Rank	4	1	98	3	5	5	5	2	2	2	98	1	3	1	1	1	1	.	1	1	1	1	1	1	1	1	1	1	1	1	1	1	1	1	4	1	1	2	2	2	2
0621	2	2	6	1	1	1	5	Administrative Rank	1	1	98	4	3	3	1	1	1	1	2	1	1	1	1	2	0	.	.	.	.	.	.	.	0	.	.	.	.	.	.	.	1	1	4	1	2	2	2	2	2
0624	2	3	8	2	1	1	5	Administrative Rank	3	1	1	4	4	4	4	1	2	2	2	1	3	1	10	4	0	1	1	1	1	1	1	1	1	1	1	1	1	1	1	1	1	1	3	2	2	2	2	2	2
0625	2	2	6	2	1	1	5	Administrative Rank	1	2	98	4	4	3	5	2	2	2	98	1	2	1	10	4	0	.	.	.	.	.	.	.	0	.	.	.	.	.	.	.	1	1	3	2	2	2	2	2	2
0626	2	4	9	1	1	2	2	Administrative Rank	1	1	1	4	5	5	5	2	2	2	98	1	4	1	10	4	1	1	1	1	1	1	1	1	1	1	1	1	1	1	1	1	1	1	3	2	2	2	2	2	2
0630	1	3	7	3	1	2	1	Administrative Rank	7	2	98	3	5	5	5	2	2	2	98	1	1	1	1	2	0	.	1	1	1	1	1	1	1	1	1	1	1	1	1	1	1	1	4	1	1	2	2	2	2
0633	1	3	8	2	1	1	1	Administrative Rank	5	2	98	4	5	5	4	2	2	1	98	1	3	1	1	2	0	1	1	1	1	1	1	1	1	1	1	1	1	1	1	1	1	1	4	2	1	2	2	2	2
0634	1	4	8	2	2	1	1	Administrative Rank	5	2	98	4	5	5	4	1	2	1	2	1	3	1	10	4	0	.	1	1	1	1	1	1	1	1	1	1	1	1	1	1	1	1	3	2	2	2	2	2	2
0636	2	2	8	1	1	1	2	Trader/Artisans/Business	7	1	1	4	4	4	5	1	1	1	2	1	6	1	10	4	0	1	.	.	.	.	.	.	0	.	.	.	.	.	.	.	.	.	3	2	2	2	2	2	2
0640	2	2	6	2	1	1	5	Professional rank	1	1	98	4	5	5	4	2	2	2	98	1	3	1	10	4	0	.	.	.	.	.	.	.	0	.	.	.	.	.	.	.	1	1	3	1	3	2	2	2	2
0642	1	3	9	1	1	2	2	Administrative Rank	6	2	98	4	5	5	5	2	2	2	98	1	3	1	10	4	1	.	1	1	1	1	1	1	1	1	1	1	1	1	1	1	1	1	3	2	2	2	2	2	2
0644	1	3	8	2	1	1	5	Administrative Rank	1	2	98	3	4	4	5	1	2	2	2	1	3	1	1	1	0	1	1	1	1	1	1	1	1	1	1	1	1	1	1	1	1	1	4	2	1	2	2	2	2
0645	1	4	8	1	2	2	1	Administrative Rank	7	2	98	4	5	5	5	1	2	2	2	1	4	1	10	4	0	.	1	1	1	1	1	1	1	1	1	1	1	1	1	1	1	1	4	2	2	2	2	2	2
0647	1	4	7	2	2	1	1	Administrative Rank	4	2	98	4	5	5	4	1	2	2	2	1	3	1	10	4	0	.	1	1	1	1	1	1	1	1	1	1	1	1	1	1	1	1	3	2	2	2	2	2	2
0649	2	3	8	1	2	1	2	Administrative Rank	7	2	98	4	5	5	5	2	2	2	98	1	3	1	10	4	0	1	1	1	1	1	1	1	1	1	1	1	1	1	1	1	1	1	3	2	1	2	2	2	2
0650	2	2	6	1	2	1	4	Professional rank	5	2	98	3	4	3	5	2	2	2	98	1	1	1	2	2	0	1	1	1	1	1	1	1	1	1	1	1	1	1	1	1	1	1	1	2	2	2	2	2	2
0653	2	3	7	2	2	4	4	Administrative Rank	5	2	98	4	3	3	5	2	2	2	98	1	1	1	10	4	0	1	1	1	1	1	1	1	1	1	1	1	1	1	1	1	1	1	4	2	2	2	2	2	2
0654	2	2	6	1	1	1	5	Administrative Rank	1	2	98	3	4	4	98	1	1	1	2	1	1	1	4	2	0	1	.	.	.	.	.	.	0	.	.	.	.	.	.	1	1	1	3	1	3	3	3	3	3
0655	2	1	5	1	2	2	5	Trader/Artisans/Business	1	1	98	3	4	4	4	2	2	2	98	1	1	1	10	4	1	1	1	1	1	1	1	1	1	1	1	1	1	1	1	1	1	1	3	1	1	2	2	2	2
0658	1	3	8	1	1	1	3	Trader/Artisans/Business	1	1	98	3	4	4	4	2	2	2	98	1	3	1	4	2	0	1	1	1	1	1	1	1	1	1	1	1	1	1	1	1	1	1	3	2	2	2	2	2	2
0663	2	2	8	1	1	1	3	Teaching/Academic Rank	1	1	1	4	4	3	5	2	2	1	98	1	6	1	10	4	1	1	1	1	1	1	1	1	1	1	1	1	1	1	1	1	1	1	3	2	2	2	2	2	2
0666	2	3	8	1	2	1	1	Administrative Rank	5	2	98	4	3	3	4	2	2	1	98	1	3	1	10	4	0	.	1	1	1	1	1	1	1	1	1	1	1	1	1	1	1	1	4	2	3	2	2	2	2
0668	2	4	9	2	2	4	2	Administrative Rank	7	2	98	4	3	3	5	2	2	2	98	1	4	1	10	4	1	.	1	1	1	1	1	1	1	1	1	1	1	1	1	1	1	1	3	2	2	2	2	2	2
0669	1	2	7	1	1	1	1	Administrative Rank	2	1	1	4	4	4	5	2	2	2	98	1	4	1	10	4	0	1	.	.	.	.	.	.	0	.	.	.	.	.	.	1	.	.	3	1	1	2	2	2	2
0670	1	2	6	1	1	4	1	Administrative Rank	1	1	1	4	5	5	5	1	1	1	2	1	3	1	10	4	1	1	1	1	1	1	1	1	1	1	1	1	1	1	1	1	1	1	4	1	2	2	2	2	2
0671	1	1	3	1	1	1	5	Administrative Rank	1	1	98	4	5	5	5	2	2	2	98	1	3	1	10	4	1	1	1	1	1	1	1	1	1	1	1	1	1	1	1	1	1	1	3	1	1	2	2	2	2
0673	2	3	8	2	1	1	5	Administrative Rank	1	2	98	4	4	5	5	1	1	1	2	1	4	1	10	4	1	1	1	1	1	1	1	1	1	1	1	1	1	1	1	1	1	1	3	1	1	2	2	2	2
0674	2	4	6	4	2	4	3	Administrative Rank	1	1	98	1	1	2	4	1	2	2	2	1	3	1	10	4	0	.	1	1	1	1	1	1	1	1	1	1	1	1	1	1	1	1	3	2	2	2	2	2	2
0683	1	4	8	1	2	1	2	Administrative Rank	7	2	98	4	5	4	5	1	1	1	2	1	3	1	10	4	0	1	.	.	.	.	.	.	0	.	.	.	.	.	.	1	.	.	3	2	2	2	2	2	2
0684	1	3	8	1	1	1	2	Administrative Rank	7	1	1	3	3	3	4	2	2	2	98	2	6	1	4	2	0	1	1	1	1	1	1	1	1	1	1	1	1	1	1	1	1	1	3	2	1	2	2	2	2
0688	1	3	7	4	1	1	4	Administrative Rank	5	1	1	4	5	5	4	2	2	2	98	1	2	1	10	4	1	1	1	1	1	1	1	1	1	1	1	1	1	1	1	1	1	1	4	2	1	2	2	2	2
0689	1	2	7	1	1	1	1	Administrative Rank	5	1	3	4	5	5	4	2	2	1	98	1	3	1	10	4	1	1	1	1	1	1	1	1	1	1	1	1	1	1	1	1	1	1	5	2	1	2	2	2	2
0691	1	2	7	1	1	1	5	Trader/Artisans/Business	1	1	98	3	3	4	4	2	2	2	98	1	4	1	4	2	0	1	.	.	.	.	.	.	0	.	.	.	.	.	.	1	.	.	4	1	1	2	2	2	2
0692	1	4	8	1	2	2	4	Trader/Artisans/Business	5	1	5	3	3	3	4	2	1	2	98	1	3	1	10	4	0	1	.	.	.	.	.	.	0	.	.	.	.	.	.	.	.	.	1	1	3	2	2	2	2
0693	1	2	6	1	1	1	6	Teaching/Academic Rank	1	2	98	4	3	3	1	2	2	2	98	1	3	1	10	4	1	1	1	1	1	1	1	1	1	1	1	1	1	1	1	1	1	1	1	1	3	2	2	2	2
0697	1	4	8	1	2	2	1	Professional rank	7	2	98	4	5	5	5	1	1	1	2	1	4	1	10	4	0	1	1	1	1	1	1	1	1	1	1	1	1	1	1	1	1	1	3	2	2	1	1	1	1
0698	2	3	7	1	1	2	2	Administrative Rank	4	2	98	3	3	4	5	1	1	1	2	1	4	1	10	4	0	1	1	1	1	1	1	1	1	1	1	1	1	1	1	1	1	1	4	1	3	3	3	3	3
0699	2	3	8	2	1	1	2	Administrative Rank	6	2	98	4	3	3	5	1	2	1	3	1	4	1	2	3	1	1	1	1	1	1	1	1	1	1	1	1	1	1	1	1	1	1	4	1	3	2	2	2	2
0700	2	3	8	1	2	1	1	Administrative Rank	3	2	98	3	4	4	5	1	2	1	2	1	3	1	10	4	0	.	.	.	.	.	.	.	0	.	.	.	.	.	.	.	.	.	3	2	2	2	2	2	2
0701	1	3	6	1	1	1	3	Administrative Rank	4	2	98	4	5	5	98	2	2	2	98	2	1	1	10	4	0	1	.	.	.	.	.	.	0	.	.	.	.	.	.	.	.	.	3	1	1	3	3	3	3
0702	2	5	9	1	2	4	4	Administrative Rank	7	1	98	4	5	5	5	2	2	2	98	1	1	1	10	4	0	.	.	.	.	.	.	.	0	.	.	.	.	.	.	.	.	.	3	1	3	2	2	2	2
0705	2	3	8	1	2	2	3	Administrative Rank	1	1	98	4	3	4	98	1	1	1	1	1	4	1	10	4	0	1	.	.	.	.	.	.	0	.	.	.	.	.	.	.	.	.	3	2	2	2	2	2	2
0709	2	5	9	1	5	1	1	Administrative Rank	7	2	98	4	4	5	98	1	1	1	2	1	1	1	2	2	0	1	.	.	.	.	.	.	0	.	.	.	.	.	.	.	.	.	3	2	2	2	2	2	2
0710	1	4	6	1	2	1	1	Administrative Rank	3	1	1	3	4	4	3	1	1	1	2	1	1	1	2	2	0	1	1	1	1	1	1	1	1	1	1	1	1	1	1	1	1	1	4	2	2	2	2	2	2
0711	1	2	6	1	2	2	4	Trader/Artisans/Business	1	2	98	4	5	5	4	1	1	1	2	1	3	1	2	2	0	1	.	.	.	.	.	.	0	.	.	.	.	.	.	.	.	.	3	3	3	2	2	2	2
0713	1	5	8	1	2	1	2	Teaching/Academic Rank	7	1	1	3	3	5	5	1	1	1	2	1	4	1	2	2	0	.	.	.	.	.	.	.	0	.	.	.	.	.	.	.	.	.	3	1	3	2	2	2	2
0714	1	3	7	2	1	1	1	Trader/Artisans/Business	4	1	1	3	3	3	5	1	1	1	2	1	4	1	1	1	1	.	1	1	1	1	1	1	1	1	1	1	1	1	1	1	1	1	3	2	2	2	2	2	2
0715	1	3	8	1	1	1	2	Trader/Artisans/Business	7	2	98	4	5	3	5	2	2	2	98	1	4	1	10	4	0	.	1	1	1	1	1	1	1	1	1	1	1	1	1	1	1	1	4	3	2	2	2	2	2
0716	1	2	6	1	1	2	5	Trader/Artisans/Business	1	2	98	3	4	4	1	2	2	1	98	1	3	1	4	1	1	1	.	.	.	.	.	.	0	.	.	.	.	.	.	.	.	.	4	2	2	2	2	2	2
0717	1	1	6	2	1	1	5	Teaching/Academic Rank	1	1	98	4	5	4	2	1	2	1	2	1	4	1	10	4	1	1	1	1	1	1	1	1	1	1	1	1	1	1	1	1	1	1	1	2	1	2	2	2	2
0719	1	5	9	1	2	2	4	Teaching/Academic Rank	6	1	5	3	3	3	4	2	2	2	98	2	1	1	10	4	0	.	.	.	.	.	.	.	0	.	.	.	.	.	.	.	.	.	3	3	3	3	3	3	3
0720	1	5	9	1	2	2	4	Professional rank	5	2	98	3	4	3	3	2	2	2	98	2	6	1	10	4	1	.	.	.	.	.	.	.	0	.	.	.	.	.	.	.	.	.	3	2	1	2	2	2	2
0721	2	3	8	2	2	1	1	Professional rank	4	1	1	4	3	3	4	2	2	1	98	1	3	1	4	2	1	1	1	1	1	1	1	1	1	1	1	1	1	1	1	1	1	1	4	1	2	2	2	2	2
0722	2	4	8	2	2	1	2	Administrative Rank	7	1	1	4	4	4	5	1	1	1	2	1	3	1	4	2	1	1	.	.	.	.	.	.	0	.	.	.	.	.	.	.	.	.	3	1	2	2	2	2	2
0725	1	4	8	1	1	1	3	Administrative Rank	1	1	98	3	4	5	4	1	1	1	1	1	6	1	10	4	1	1	.	.	.	.	.	.	0	.	.	.	.	.	.	.	.	.	1	1	2	2	2	2	2
0726	1	3	9	1	2	1	2	Administrative Rank	7	2	98	3	3	3	5	1	1	1	2	1	4	1	10	4	1	1	.	.	.	.	.	.	0	.	.	.	.	.	.	.	.	.	3	1	3	2	2	2	2
0728	1	4	9	2	2	1	2	Administrative Rank	7	2	98	4	3	3	5	1	1	1	2	1	4	1	10	4	1	1	1	1	1	1	1	1	1	1	1	1	1	1	1	1	1	1	4	1	2	1	1	1	1
0729	1	5	9	1	3	2	5	Administrative Rank	4	2	98	3	3	3	3	2	2	2	98	1	3	1	10	4	1	1	1	1	1	1	1	1	1	1	1	1	1	1	1	1	1	1	2	1	1	2	2	2	2
0730	1	3	8	2	1	1	1	Administrative Rank	5	2	98	4	5	4	5	2	2	2	98	1	3	1	10	4	1	1	1	1	1	1	1	1	1	1	1	1	1	1	1	1	1	1	2	1	1	2	2	2	2
0731	2	3	9	1	1	1	2	Administrative Rank	2	2	98	4	4	4	5	2	2	2	98	1	3	1	10	4	1	1	1	1	1	1	1	1	1	1	1	1	1	1	1	1	1	1	2	1	1	2	2	2	2
0732	2	3	8	2	2	1	4	Administrative Rank	1	2	98	4	4	4	5	1	1	1	1	1	2	1	10	4	1	1	.	.	.	.	.	.	0	.	.	.	.	.	.	.	.	.	3	1	2	2	2	2	2
0733	2	2	6	1	1	1	5	Administrative Rank	1	1	98	3	3	3	5	1	2	1	1	1	1	1	1	1	1	1	1	1	1	1	1	1	1	1	1	1	1	1	1	1	1	1	5	2	2	2	2	2	2
0736	2	2	5	1	1	1	3	Administrative Rank	1	2	98	3	4	4	4	2	2	2	98	1	6	1	10	4	1	1	1	1	1	1	1	1	1	1	1	1	1	1	1	1	1	1	2	1	1	2	2	2	2
0737	1	2	7	2	1	1	5	Administrative Rank	1	2	98	3	4	4	5	2	2	2	98	1	3	1	1	1	1	1	1	1	1	1	1	1	1	1	1	1	1	1	1	1	1	1	2	1	1	2	2	2	2
0738	1	3	7	1	1	1	3	Administrative Rank	6	1	1	4	5	4	4	2	2	1	98	1	3	1	4	2	0	.	.	.	.	.	.	.	0	.	.	.	.	.	.	.	.	.	4	2	2	1	1	1	1
0739	1	2	8	1	2	2	6	Administrative Rank	5	1	1	4	5	5	98	2	2	2	98	1	3	1	1	1	1	1	1	1	1	1	1	1	1	1	1	1	1	1	1	1	1	1	4	2	2	1	1	1	1
0740	1	3	8	1	2	1	1	Trader/Artisans/Business	5	2	98	4	3	3	5	2	2	2	98	1	2	1	4	2	1	1	.	.	.	.	.	.	0	.	.	.	.	.	.	.	.	.	4	2	2	2	2	2	2
0741	2	2	5	1	1	1	5	Trader/Artisans/Business	1	1	98	3	4	4	4	2	2	2	98	1	2	1	4	2	0	.	.	.	.	.	.	.	0	.	.	.	.	.	.	.	.	.	3	1	1	1	1	1	1
0742	1	3	7	1	1	1	1	Teaching/Academic Rank	4	1	98	3	4	4	4	2	2	2	98	1	3	1	10	4	0	1	.	.	.	.	.	.	0	.	.	.	.	.	.	.	.	.	4	1	1	2	2	2	2
0743	2	3	8	2	2	2	3	Trader/Artisans/Business	1	1	98	3	4	5	5	1	1	1	2	1	1	1	10	4	1	1	.	.	.	.	.	.	0	.	.	.	.	.	.	.	.	.	3	1	3	2	2	2	2
0744	1	3	8	1	1	2	3	Teaching/Academic Rank	1	1	98	4	5	5	5	1	1	1	2	1	3	1	4	1	1	1	1	1	1	1	1	1	1	1	1	1	1	1	1	1	1	1	2	2	2	1	1	1	1
0745	1	3	8	1	2	1	4	Professional rank	1	2	98	4	4	5	5	1	2	1	2	1	4	1	4	2	1	1	.	.	.	.	.	.	0	.	1	.	.	.	.	.	.	.	4	2	2	2	2	2	2
0746	2	4	8	1	2	1	3	Professional rank	1	1	98	4	4	4	4	1	1	1	2	1	3	1	10	4	1	1	.	.	.	.	.	.	0	.	1	.	.	.	.	.	.	.	4	2	3	3	3	3	3
0748	2	3	9	1	1	1	3	Administrative Rank	1	1	98	3	3	3	4	1	1	1	3	1	6	1	10	4	1	1	.	.	.	.	.	.	0	.	1	.	.	.	1	.	.	.	4	3	3	2	2	2	2
0749	1	4	8	1	2	2	1	Administrative Rank	7	1	98	4	5	5	4	2	2	2	98	1	3	1	10	4	0	.	.	.	.	.	.	.	0	.	.	.	.	1	1	.	.	.	4	1	1	2	2	2	2
0750	1	4	8	2	1	2	2	Administrative Rank	7	1	98	4	5	5	5	2	2	2	98	1	3	1	10	4	0	.	.	.	.	.	.	.	0	.	.	.	.	1	1	.	.	.	4	1	1	2	2	2	2
0751	2	3	8	1	2	2	1	Administrative Rank	7	1	98	4	5	5	5	2	2	2	98	1	3	1	9	1	0	1	.	.	.	.	1	1	1	.	.	.	.	1	1	.	.	.	4	1	1	2	2	2	2
0752	1	3	6	2	1	2	3	Administrative Rank	1	1	98	3	5	4	5	1	1	1	2	1	3	1	10	4	1	.	.	.	.	.	.	.	0	.	.	.	.	1	.	.	.	.	4	2	1	2	2	2	2
0753	2	3	8	1	1	1	1	Administrative Rank	4	2	98	4	5	4	5	2	2	2	98	1	3	1	9	2	0	1	.	.	.	.	.	.	0	.	.	.	.	.	.	.	.	.	4	1	1	2	2	2	2
0754	1	3	8	2	1	1	4	Administrative Rank	7	2	98	3	4	4	4	2	2	2	98	1	3	1	10	4	0	1	1	1	1	1	1	1	1	1	1	1	1	1	1	1	1	1	4	2	2	1	1	1	1
0755	2	3	7	4	1	1	4	Professional rank	3	2	98	3	4	3	4	2	2	1	98	1	3	1	10	4	0	1	1	1	1	1	1	1	1	1	1	1	1	1	1	1	1	1	4	2	1	2	2	2	2
0756	2	3	8	1	2	1	6	Professional rank	1	1	98	4	5	5	5	1	1	1	2	1	6	1	10	4	1	1	.	.	.	.	.	.	0	.	.	.	.	.	.	.	.	.	4	3	3	2	2	2	2
0758	2	4	8	1	2	1	1	Professional rank	7	1	1	3	3	3	4	1	1	1	3	1	6	1	10	4	0	.	.	.	.	.	.	.	0	.	.	.	.	.	.	.	.	.	5	3	3	2	2	2	2
0760	2	4	8	2	2	1	1	Administrative Rank	6	2	98	3	3	3	4	1	1	1	3	1	3	1	10	4	0	.	.	.	.	.	.	.	0	.	.	.	.	.	.	.	.	.	4	3	3	2	2	2	2
0762	2	5	8	4	2	2	4	Trader/Artisans/Business	7	2	98	3	3	3	4	1	1	1	1	1	4	1	10	4	1	1	.	.	.	.	.	.	0	.	.	.	.	.	.	.	.	.	4	1	3	2	2	2	2
0763	2	3	7	1	1	1	3	Trader/Artisans/Business	1	1	98	3	3	3	5	1	1	1	2	1	1	1	10	4	0	.	.	.	.	.	.	.	0	.	.	.	.	.	.	.	.	.	4	3	3	2	2	2	2
0765	1	3	8	2	1	1	3	Trader/Artisans/Business	1	1	98	3	3	3	5	1	1	1	2	1	3	1	10	4	0	.	.	.	.	.	.	.	0	.	.	.	.	.	.	.	.	.	4	2	2	3	3	3	3
0766	1	3	8	2	2	1	4	Trader/Artisans/Business	7	1	98	4	5	5	4	2	2	2	98	1	3	1	1	2	0	1	.	.	.	.	.	.	0	.	.	.	.	.	.	.	.	.	4	1	2	2	2	2	2
0767	1	4	7	1	1	1	4	Professional rank	7	2	98	3	4	4	4	2	2	2	98	1	3	1	10	4	0	.	.	.	.	.	.	.	0	.	.	.	.	.	.	.	.	.	4	1	1	1	1	1	1
0768	2	3	7	1	2	1	6	Professional rank	1	1	98	4	5	5	4	2	2	2	98	1	6	1	10	4	1	1	1	1	1	1	1	1	1	1	1	1	1	1	1	1	1	1	4	1	1	2	2	2	2
0769	1	4	5	1	2	1	4	Administrative Rank	2	2	98	3	4	3	4	1	1	1	2	2	6	1	10	4	0	.	.	.	.	.	.	.	0	.	.	.	.	.	.	.	.	.	4	1	1	2	2	2	2
0770	1	4	4	3	2	2	1	Administrative Rank	4	1	1	3	4	4	5	2	2	2	98	2	6	1	10	4	0	.	.	.	.	.	.	.	0	.	.	.	.	.	.	.	.	.	4	1	1	2	2	2	2
0771	1	3	8	1	1	1	5	Administrative Rank	1	1	98	4	5	5	3	2	2	2	98	2	3	1	10	4	0	.	1	1	1	1	1	1	1	1	1	1	1	1	1	1	1	1	2	1	2	2	2	2	2
0772	1	3	7	2	2	1	4	Trader/Artisans/Business	6	2	98	3	4	4	4	2	2	2	98	1	3	1	10	4	1	.	1	1	1	1	1	1	1	1	1	1	1	1	1	1	1	1	4	1	2	2	2	2	2
0773	2	3	8	1	1	1	1	Trader/Artisans/Business	2	2	98	3	4	4	4	1	1	1	3	1	3	1	10	4	0	1	.	.	.	.	.	.	0	.	.	.	.	.	.	.	.	.	4	1	2	2	2	2	2
0774	1	4	7	1	4	2	2	Teaching/Academic Rank	7	2	98	2	3	3	3	2	2	2	98	1	2	1	10	4	1	.	1	1	1	1	1	1	1	1	1	1	1	1	1	1	1	1	4	1	2	2	2	2	2
0775	2	3	7	3	2	2	4	Trader/Artisans/Business	4	1	98	4	5	5	5	2	2	2	98	1	3	1	10	4	1	1	1	1	1	1	1	1	1	1	1	1	1	1	1	1	1	1	4	2	2	2	2	2	2
0776	2	2	8	2	3	2	6	Trader/Artisans/Business	6	1	1	4	4	4	98	1	1	1	3	1	4	1	10	4	1	1	1	1	1	1	1	1	1	1	1	1	1	1	1	1	1	1	4	1	2	2	2	2	2
0777	1	5	8	1	2	2	2	Trader/Artisans/Business	7	1	98	4	4	4	5	1	1	1	2	1	1	1	10	4	1	1	.	.	.	.	.	.	0	.	.	.	.	.	.	.	.	.	4	1	3	2	2	2	2
0779	2	3	8	2	1	1	5	Trader/Artisans/Business	1	2	98	3	3	3	5	1	1	1	2	1	4	1	10	4	1	1	.	.	.	.	.	.	0	.	.	.	.	.	.	.	.	.	4	1	3	2	2	2	2
0780	2	4	8	1	2	2	1	Teaching/Academic Rank	5	1	1	4	4	4	5	1	1	1	2	1	3	1	5	2	1	1	.	.	.	.	.	.	0	.	.	.	.	.	.	.	.	.	4	1	3	2	2	2	2
0781	1	2	7	2	2	2	4	Trader/Artisans/Business	4	2	98	3	4	3	5	1	2	1	2	1	6	1	10	4	1	1	.	.	.	.	.	.	0	.	.	.	.	.	.	.	.	.	4	3	3	2	2	2	2
0782	1	4	7	1	2	1	3	Teaching/Academic Rank	7	2	98	4	4	4	5	1	1	1	2	1	1	1	5	2	1	1	1	1	1	1	1	1	1	1	1	1	1	1	1	1	1	1	4	1	3	2	2	2	2
0783	1	2	8	1	1	2	5	Trader/Artisans/Business	1	1	98	4	4	4	5	1	1	1	2	1	4	1	10	4	1	1	1	1	1	1	1	1	1	1	1	1	1	1	1	1	1	1	4	3	3	2	2	2	2
0784	2	3	8	2	2	3	4	Teaching/Academic Rank	5	2	98	4	4	4	5	1	1	1	2	1	3	1	5	2	1	1	.	.	.	.	.	.	0	.	.	.	.	.	.	.	.	.	4	2	2	2	2	2	2
0785	2	2	8	1	1	1	5	Trader/Artisans/Business	3	2	98	4	3	3	98	1	1	1	3	1	4	1	10	4	1	1	.	.	.	.	.	.	0	.	.	.	.	.	.	.	.	.	4	3	3	2	2	2	2
0787	2	2	8	2	2	1	3	Trader/Artisans/Business	2	1	98	4	4	3	5	1	1	1	3	1	6	1	5	2	1	1	1	1	1	1	1	1	1	1	1	1	1	1	1	1	1	1	4	3	3	3	3	3	3
0788	1	4	8	4	1	1	6	Professional rank	5	2	98	4	4	4	5	1	1	1	3	1	3	1	10	4	1	1	.	.	.	.	.	.	0	.	.	.	.	.	.	.	.	.	4	2	3	2	2	2	2
0789	1	3	8	1	1	1	2	Administrative Rank	5	2	98	4	4	4	4	1	1	1	2	1	3	1	10	4	1	1	.	.	.	.	.	.	0	.	.	.	.	.	.	.	.	.	4	3	3	2	2	2	2
0790	1	3	8	1	2	1	1	Trader/Artisans/Business	7	1	98	4	4	4	4	1	1	1	2	1	4	1	10	4	1	1	.	.	.	.	.	.	0	.	.	.	.	.	.	.	.	.	4	3	3	3	3	3	3
0792	1	3	10	4	1	1	2	Professional rank	5	2	98	1	3	3	5	1	1	1	2	1	6	1	10	4	1	1	.	.	.	.	.	.	0	.	.	.	.	.	.	.	.	.	4	3	3	3	3	3	3
0793	1	2	7	1	1	2	6	Administrative Rank	2	1	98	2	3	3	98	1	1	1	3	1	6	1	10	4	1	1	.	.	.	.	.	.	0	.	.	.	.	.	.	.	.	.	4	3	3	3	3	3	3
0795	2	3	10	2	2	3	2	Teaching/Academic Rank	6	2	98	4	5	5	5	1	1	1	3	1	4	1	10	4	1	1	1	1	1	1	1	1	1	1	1	1	1	1	1	1	1	1	4	2	2	2	2	2	2
0796	1	5	10	1	2	1	4	Professional rank	7	1	98	4	3	3	5	1	1	1	3	1	1	1	8	2	1	1	.	.	.	.	.	.	0	1	1	.	.	.	.	.	.	.	4	3	3	3	3	3	3
0797	2	2	8	4	2	3	2	Professional rank	6	1	2	4	3	3	5	1	1	1	1	1	1	1	10	4	1	1	.	.	.	.	.	.	0	.	.	.	.	.	.	.	.	.	4	3	3	3	3	3	3
0798	2	4	9	4	2	1	1	Professional rank	7	2	98	3	3	4	98	1	1	1	1	1	4	1	10	4	1	1	1	1	1	1	1	1	1	1	1	1	1	1	1	1	1	1	4	1	3	2	2	2	2
0799	1	2	7	1	1	1	3	Professional rank	2	1	98	3	3	3	5	1	2	1	1	1	1	1	10	4	1	1	1	1	1	1	1	1	1	1	1	1	1	1	1	1	1	1	4	1	2	1	1	1	1
0800	1	4	8	2	2	1	2	Professional rank	7	1	2	3	3	3	4	1	1	1	1	1	6	1	10	4	1	1	.	.	.	.	.	.	0	.	.	.	.	.	.	.	.	.	4	2	2	1	1	1	1
0801	1	3	7	2	1	1	1	Trader/Artisans/Business	2	1	1	4	4	4	5	1	1	1	1	1	6	1	10	4	1	1	.	.	.	.	.	.	0	.	.	.	.	.	.	.	.	.	4	3	3	3	3	3	3
0802	1	2	8	1	2	1	4	Trader/Artisans/Business	2	2	98	1	5	5	5	1	1	1	1	1	6	1	10	4	0	1	.	.	.	.	.	.	0	.	.	.	.	.	.	.	.	.	4	3	3	3	3	3	3
0803	1	3	8	1	1	1	2	Trader/Artisans/Business	7	2	98	4	4	4	98	1	1	1	2	1	4	1	10	4	0	.	.	.	.	.	.	.	0	.	.	.	.	.	.	.	.	.	4	2	2	2	2	2	2
0805	1	3	7	2	2	1	6	Trader/Artisans/Business	5	2	98	3	5	5	98	1	1	1	2	1	6	1	10	4	1	1	.	.	.	.	.	.	0	.	.	.	1	.	.	.	.	.	4	3	3	3	3	3	3
0806	2	2	7	2	2	1	6	Administrative Rank	2	2	98	4	5	5	5	1	1	1	2	1	1	1	10	4	1	1	.	.	.	.	.	.	0	.	.	.	.	.	.	.	.	.	4	3	3	2	2	2	2
0807	1	4	9	1	2	1	3	Administrative Rank	7	2	98	4	4	4	98	1	1	1	2	1	6	1	10	4	1	1	.	.	.	.	.	.	0	.	.	.	.	.	.	.	.	.	4	3	3	2	2	2	2
0809	1	4	8	2	2	1	2	Administrative Rank	7	1	1	4	4	4	5	1	2	1	2	1	6	1	10	4	0	.	.	.	.	.	.	.	0	.	.	1	1	.	.	.	.	.	4	3	3	2	2	2	2
0810	1	3	8	1	1	1	5	Clergy Rank	2	1	98	4	5	5	5	2	2	2	98	1	3	1	10	4	1	1	1	1	1	1	1	1	1	1	1	1	1	1	1	1	1	1	4	1	1	2	2	2	2
0812	2	3	7	1	1	2	1	Professional rank	6	1	1	3	3	3	5	1	2	2	2	1	2	1	7	2	1	.	.	.	.	.	.	.	0	.	.	1	1	.	.	.	.	.	1	2	2	2	2	2	2
0813	2	2	8	1	2	1	1	Administrative Rank	7	2	98	3	3	3	5	1	1	1	2	1	4	1	10	4	1	1	.	.	.	.	.	.	0	.	.	1	1	.	.	.	.	.	4	3	3	2	2	2	2
0814	1	2	8	2	1	1	2	Administrative Rank	7	1	1	3	3	3	3	2	2	2	98	2	6	1	10	4	0	.	.	.	.	.	.	.	0	.	.	.	.	.	.	.	.	.	4	1	1	2	2	2	2
0816	1	3	6	2	1	1	1	Clergy Rank	7	2	98	2	3	3	2	1	2	2	2	2	6	1	10	4	0	.	.	.	.	.	.	.	0	.	.	.	.	.	.	.	.	.	5	2	2	2	2	2	2
0817	2	3	7	3	2	2	1	Clergy Rank	7	1	1	4	5	5	5	2	2	2	98	1	3	1	10	4	1	.	.	.	.	.	.	.	0	.	.	.	.	.	.	.	.	.	4	1	1	2	2	2	2
0819	1	3	6	2	2	1	4	Trader/Artisans/Business	5	1	1	3	4	3	4	2	2	2	98	2	6	1	10	4	0	.	.	.	.	.	.	.	0	.	.	.	.	.	.	.	.	.	5	2	2	2	2	2	2
0820	1	4	8	1	2	1	6	Clergy Rank	7	2	98	3	5	5	5	2	2	2	98	1	4	1	4	2	1	1	1	1	1	1	1	1	1	1	1	1	1	1	1	1	1	1	1	1	1	2	2	2	2
0821	1	3	8	1	4	3	1	Others	7	1	1	2	4	4	4	2	2	2	98	1	4	1	8	2	1	1	1	1	1	1	1	1	1	1	1	1	1	1	1	1	1	1	4	1	1	2	2	2	2
0822	1	3	8	1	1	1	5	Teaching/Academic Rank	2	1	98	3	4	4	4	2	2	2	98	1	1	1	10	4	1	1	.	.	.	.	.	.	0	.	.	1	.	.	.	.	.	.	4	3	3	2	2	2	2
0826	2	2	8	1	1	1	3	Professional rank	2	2	98	4	4	5	5	1	1	1	2	1	1	1	6	3	0	1	1	1	1	1	1	1	1	1	1	1	1	1	1	1	1	1	4	2	2	2	2	2	2
0827	1	3	8	4	1	1	4	Professional rank	6	1	1	3	3	3	3	2	2	2	98	1	4	1	10	4	1	1	1	1	1	1	1	1	1	1	1	1	1	1	1	1	1	1	1	1	1	2	2	2	1
0829	1	3	7	4	2	1	2	Administrative Rank	7	2	98	4	5	5	5	1	2	2	2	1	3	1	8	2	1	1	1	1	1	1	1	1	1	1	1	1	1	1	1	1	1	1	4	1	1	2	2	2	2
0830	2	2	6	1	2	1	3	Administrative Rank	2	1	98	3	4	3	3	2	1	1	98	1	2	1	10	4	1	.	.	.	.	.	.	.	0	.	.	.	.	.	.	.	.	.	4	1	3	2	2	2	1
0831	1	3	8	1	1	1	1	Clergy Rank	7	1	1	4	5	3	4	2	2	2	98	1	3	1	1	1	1	1	1	1	1	1	1	1	1	1	1	1	1	1	1	1	1	1	4	1	2	2	2	2	1
0832	1	3	8	1	1	1	2	Clergy Rank	7	2	98	4	5	5	5	2	1	1	98	1	2	1	10	4	0	.	.	.	.	.	.	.	0	.	.	.	.	.	.	.	.	.	4	1	1	2	2	2	1
0833	1	3	8	1	1	1	3	Teaching/Academic Rank	7	1	1	4	5	4	4	2	2	2	98	1	2	1	8	2	1	1	1	1	1	1	1	1	1	1	1	1	1	1	1	1	1	1	1	2	2	2	2	2	1
0834	1	3	8	1	1	1	3	Trader/Artisans/Business	7	1	1	4	5	4	4	2	2	2	98	1	2	1	8	2	1	1	1	1	1	1	1	1	1	1	1	1	1	1	1	1	1	1	1	2	2	2	2	2	1
0835	2	4	8	4	2	1	1	Clergy Rank	7	2	98	4	5	5	4	2	2	2	98	1	1	1	10	4	1	1	1	1	1	1	1	1	1	1	1	1	1	1	1	1	1	1	4	2	2	2	2	2	1
0836	1	3	8	4	2	1	3	Others	2	1	98	3	3	4	3	1	1	1	2	1	2	1	10	4	1	1	1	1	1	1	1	1	1	1	1	1	1	1	1	1	1	1	5	1	1	2	2	2	1
0837	2	2	6	1	1	2	5	Teaching/Academic Rank	2	1	3	2	2	3	2	1	1	2	2	1	6	1	10	4	1	.	1	1	1	1	1	1	1	1	1	1	1	1	1	1	1	1	4	1	1	2	2	2	1
0838	2	3	9	1	1	1	6	Trader/Artisans/Business	7	2	98	4	5	5	5	1	1	1	2	1	2	1	10	4	0	.	.	.	.	.	.	.	0	.	.	.	.	.	.	.	.	.	4	2	1	2	2	2	1
0839	1	1	6	4	1	1	5	Teaching/Academic Rank	2	1	98	4	5	5	5	2	1	1	98	1	2	1	7	2	1	1	1	1	1	1	1	1	1	1	1	1	1	1	1	1	1	1	1	1	2	2	2	2	2
0840	2	1	6	4	1	1	5	Professional rank	1	1	1	4	5	5	1	1	2	1	2	1	1	1	10	4	1	1	1	1	1	1	1	1	1	1	1	1	1	1	1	1	1	1	4	2	1	2	2	2	2
0841	2	1	6	1	1	2	5	Professional rank	2	2	98	4	5	4	98	2	2	2	98	1	1	1	7	2	1	1	1	1	1	1	1	1	1	1	1	1	1	1	1	1	1	1	4	2	1	2	2	2	1
0842	2	1	6	1	1	1	5	Administrative Rank	2	1	98	3	5	4	98	2	2	2	98	1	1	1	10	4	1	1	1	1	1	1	1	1	1	1	1	1	1	1	1	1	1	1	4	2	1	2	2	2	1
0843	1	1	6	2	1	1	5	Administrative Rank	2	2	3	4	5	5	5	2	2	2	98	1	1	1	1	2	1	.	1	1	1	1	1	1	1	1	1	1	1	1	1	1	1	1	2	2	2	2	2	2	1
0844	1	1	6	2	1	1	5	Administrative Rank	2	1	98	3	4	4	5	1	2	1	2	1	1	1	10	4	1	1	1	1	1	1	1	1	1	1	1	1	1	1	1	1	1	1	4	3	3	2	2	2	2
0845	2	3	6	1	1	1	6	Administrative Rank	2	2	98	4	5	4	98	2	2	2	98	1	1	1	7	2	1	1	.	.	.	.	.	.	0	.	.	.	.	.	.	.	.	.	4	1	3	2	2	2	1
0846	1	3	7	1	2	1	2	Administrative Rank	5	2	98	3	4	5	5	2	2	2	98	1	1	1	1	2	0	.	.	.	.	.	.	.	0	.	.	.	.	.	.	.	.	.	4	3	3	3	3	3	3
0847	2	3	7	1	2	1	6	Administrative Rank	1	1	98	4	5	5	5	2	2	2	98	1	6	1	10	4	1	1	.	.	.	.	.	.	0	.	.	.	.	.	.	.	.	.	4	2	2	2	2	2	2
0848	2	3	8	1	1	1	1	Administrative Rank	2	2	98	4	5	5	98	1	2	1	2	1	1	1	1	1	0	1	1	1	1	1	1	1	1	1	1	1	1	1	1	1	1	1	4	2	1	2	2	2	2
0849	1	4	8	1	2	1	1	Administrative Rank	4	1	1	3	4	4	5	2	2	2	98	1	1	1	10	4	1	.	1	1	1	1	1	1	1	1	1	1	1	1	1	1	1	1	4	2	2	2	2	2	1
0850	2	3	6	2	2	1	4	Administrative Rank	5	1	1	2	3	3	4	1	2	1	2	1	6	1	3	2	0	.	.	.	.	.	.	.	0	.	.	.	.	.	.	.	.	.	4	1	1	2	2	2	1
0851	1	4	9	2	5	1	2	Administrative Rank	7	2	98	4	5	5	5	1	2	1	2	1	1	1	10	4	1	1	1	1	1	1	1	1	1	1	1	1	1	1	1	1	1	1	3	1	1	2	2	2	2
0852	1	2	6	1	2	1	3	Administrative Rank	2	1	98	3	4	4	98	2	2	1	98	1	2	1	7	2	0	.	.	.	.	.	.	.	0	.	.	.	.	.	.	.	.	.	4	1	1	2	2	2	1
0853	1	3	8	1	1	2	1	Administrative Rank	2	2	98	2	4	4	4	2	2	2	98	1	1	1	3	2	0	.	.	.	.	.	.	.	0	.	.	.	.	.	.	.	.	.	4	1	3	2	2	2	2
0854	1	4	8	1	2	1	2	Administrative Rank	7	1	1	3	4	5	4	2	2	2	98	1	1	1	10	4	1	1	1	1	1	1	1	1	1	1	1	1	1	1	1	1	1	1	1	1	1	2	2	2	2
0856	2	3	9	1	1	1	4	Administrative Rank	7	1	1	4	4	5	4	2	2	2	98	1	2	1	10	4	1	1	1	1	1	1	1	1	1	1	1	1	1	1	1	1	1	1	5	1	1	2	2	2	1
0858	1	4	9	1	2	1	1	Administrative Rank	7	1	1	4	4	4	4	1	2	2	2	1	1	1	10	4	0	1	.	.	.	.	.	.	0	.	.	.	.	.	.	.	.	.	1	1	1	2	2	2	2
0859	1	3	9	1	2	2	4	Administrative Rank	7	1	1	4	3	5	5	2	2	2	98	1	1	1	10	4	0	1	.	.	.	.	.	.	0	.	.	.	.	.	.	.	.	.	4	1	1	2	2	2	1
0860	1	3	7	1	1	1	2	Clergy Rank	7	2	98	3	3	4	4	2	2	2	98	1	1	1	3	3	0	1	.	.	.	.	.	.	0	.	.	.	.	.	.	.	.	.	4	1	1	2	2	2	2
0861	1	2	7	2	1	1	5	Others	2	2	98	2	3	3	3	1	2	1	2	1	2	1	3	3	1	1	1	1	1	1	1	1	1	1	1	1	1	1	1	1	1	1	5	1	1	2	2	2	1
0862	1	4	9	1	1	1	6	Teaching/Academic Rank	6	1	1	4	5	3	5	2	2	2	98	1	6	1	10	4	1	1	1	1	1	1	1	1	1	1	1	1	1	1	1	1	1	1	1	2	2	2	2	2	1
0863	1	2	9	4	2	1	1	Trader/Artisans/Business	7	2	98	4	3	3	98	2	2	2	98	1	4	1	6	3	1	1	1	1	1	1	1	1	1	1	1	1	1	1	1	1	1	1	4	2	2	2	2	2	1
0864	2	2	6	4	1	1	4	Teaching/Academic Rank	2	1	98	3	4	3	5	1	2	1	1	1	2	1	1	1	0	1	1	1	1	1	1	1	1	1	1	1	1	1	1	1	1	1	1	2	1	2	2	2	2
0865	1	1	7	1	1	2	5	Professional rank	2	1	98	3	4	4	4	2	2	1	98	1	2	1	7	2	0	1	1	1	1	1	1	1	1	1	1	1	1	1	1	1	1	1	1	1	1	2	2	2	2
0866	1	3	8	2	2	1	2	Professional rank	7	2	98	3	4	3	4	2	2	2	98	1	1	1	4	2	0	.	.	.	.	.	.	.	0	.	.	.	.	.	.	.	.	.	4	3	3	3	3	3	3
0867	2	4	6	4	2	1	4	Administrative Rank	5	1	3	3	4	3	4	2	2	2	98	1	1	1	4	2	0	.	.	.	.	.	.	.	0	.	.	.	.	.	.	.	.	.	4	3	3	3	3	3	3
0868	2	3	8	2	2	1	4	Administrative Rank	6	2	98	3	3	3	4	2	2	2	98	1	2	1	4	3	0	1	1	1	1	1	1	1	1	1	1	1	1	1	1	1	1	1	5	1	1	2	2	2	2
0869	2	3	8	1	2	1	4	Administrative Rank	2	1	98	4	5	3	98	2	2	2	98	1	1	1	7	2	0	.	.	.	.	.	.	.	0	.	.	.	.	.	.	.	.	.	4	3	3	3	3	3	3
0870	2	3	8	2	1	1	4	Administrative Rank	6	2	98	4	5	3	2	2	2	1	98	1	4	1	4	2	0	.	.	.	.	.	.	.	0	.	.	.	.	.	.	.	.	.	4	3	3	3	3	3	3
0871	2	2	9	1	2	1	1	Administrative Rank	7	2	98	4	5	5	1	2	2	1	98	1	6	1	4	3	0	1	1	1	1	1	1	1	1	1	1	1	1	1	1	1	1	1	5	2	2	2	2	2	2
0872	2	3	7	1	2	1	4	Administrative Rank	2	1	3	4	5	5	4	2	2	2	98	1	1	1	7	2	0	.	.	.	.	.	.	.	0	.	.	.	.	.	.	.	.	.	4	3	3	3	3	3	3
0873	1	2	7	2	1	1	5	Administrative Rank	2	1	3	3	3	3	3	1	2	1	2	1	2	1	4	3	1	1	1	1	1	1	1	1	1	1	1	1	1	1	1	1	1	1	4	1	1	2	2	2	2
0875	1	3	8	1	1	1	1	Trader/Artisans/Business	5	2	98	3	5	5	3	2	2	2	98	1	4	1	4	3	0	.	.	.	.	.	.	.	0	.	.	.	.	.	.	.	.	.	4	1	3	2	2	2	1
0876	1	4	9	2	2	1	4	Trader/Artisans/Business	7	2	98	3	3	3	4	2	2	1	98	1	1	1	4	3	0	1	.	.	.	.	.	.	0	.	.	.	.	.	.	.	.	.	4	1	2	2	2	2	1
0877	2	3	9	1	2	1	4	Teaching/Academic Rank	1	2	98	3	3	3	98	2	2	2	98	1	4	1	1	1	0	.	1	1	1	1	1	1	1	1	1	1	1	1	1	1	1	1	4	2	2	2	2	2	1
0878	2	3	9	1	1	1	1	Trader/Artisans/Business	6	1	1	3	4	3	4	1	2	2	2	1	1	1	4	2	0	.	.	.	.	.	.	.	0	.	.	.	.	.	.	.	.	.	4	3	3	2	2	2	1
0879	2	2	8	1	2	2	4	Teaching/Academic Rank	2	1	98	3	4	4	5	1	2	1	1	1	6	1	10	4	1	1	1	1	1	1	1	1	1	1	1	1	1	1	1	1	1	1	4	3	3	2	2	2	2
0880	1	5	8	4	2	1	4	Professional rank	6	1	1	3	4	3	98	2	2	1	98	1	2	1	7	2	1	.	1	1	1	1	1	1	1	1	1	1	1	1	1	1	1	1	4	2	1	2	2	2	2
0881	2	3	9	4	1	1	1	Professional rank	7	2	98	3	3	3	4	1	2	1	2	1	2	1	4	3	1	1	1	1	1	1	1	1	1	1	1	1	1	1	1	1	1	1	4	3	3	2	2	2	1
0882	1	3	8	2	2	1	1	Administrative Rank	6	2	98	3	4	4	5	1	2	2	2	1	3	1	4	3	0	1	.	.	.	.	.	.	0	.	.	.	.	.	.	.	.	.	1	2	1	2	2	2	1
0883	1	4	8	1	2	1	1	Administrative Rank	4	1	1	4	4	4	4	2	2	2	98	1	3	1	7	2	0	1	1	1	1	1	1	1	1	1	1	1	1	1	1	1	1	1	4	1	1	2	2	2	1
0884	1	3	8	2	2	1	2	Administrative Rank	7	2	98	3	3	3	4	2	2	2	98	1	3	1	4	3	1	1	1	1	1	1	1	1	1	1	1	1	1	1	1	1	1	1	3	1	1	2	2	2	1
0885	1	5	7	1	2	2	1	Administrative Rank	7	1	1	2	3	3	3	1	2	2	2	2	6	1	10	4	0	.	.	.	.	.	.	.	0	.	.	.	.	.	.	.	.	.	4	1	1	2	2	2	2
0886	2	3	5	2	1	1	1	Administrative Rank	5	2	98	4	5	5	5	2	2	2	98	1	1	1	1	3	0	1	1	1	1	1	1	1	1	1	1	1	1	1	1	1	1	1	4	1	1	2	2	2	1
0887	2	3	6	1	2	1	4	Administrative Rank	3	2	98	3	4	4	1	2	2	1	98	1	3	1	7	2	0	.	1	1	1	1	1	1	1	1	1	1	1	1	1	1	1	1	4	1	1	2	2	2	1
0889	1	4	8	1	4	2	2	Administrative Rank	7	1	1	3	5	5	4	2	2	2	98	1	3	1	1	3	0	1	1	1	1	1	1	1	1	1	1	1	1	1	1	1	1	1	4	1	1	2	2	2	2
0890	2	3	8	2	1	2	1	Trader/Artisans/Business	7	2	98	3	5	5	5	2	2	2	98	1	3	1	7	2	1	1	1	1	1	1	1	1	1	1	1	1	1	1	1	1	1	1	4	1	1	1	1	1	1
0891	1	3	8	1	1	1	2	Trader/Artisans/Business	6	1	1	4	5	5	5	2	2	2	98	2	1	1	1	3	0	1	1	1	1	1	1	1	1	1	1	1	1	1	1	1	1	1	4	2	2	2	2	2	2
0892	1	3	9	1	2	1	1	Others	7	2	98	3	4	4	4	2	2	1	98	1	4	1	1	1	1	.	1	1	1	1	1	1	1	1	1	1	1	1	1	1	1	1	4	1	1	1	1	1	1
0893	2	2	6	3	1	2	5	Administrative Rank	2	1	98	4	5	5	5	2	2	2	98	1	6	1	1	1	1	.	.	.	.	.	.	.	0	.	.	.	.	.	.	.	.	.	4	1	1	2	2	2	1
0894	1	4	9	1	2	1	1	Administrative Rank	7	1	1	3	3	3	3	2	2	2	98	1	3	1	1	3	1	1	1	1	1	1	1	1	1	1	1	1	1	1	1	1	1	1	2	1	1	2	2	2	1
0895	1	3	8	2	2	1	2	Administrative Rank	7	1	1	3	4	5	4	1	2	1	2	1	3	1	7	2	0	.	1	1	1	1	1	1	1	1	1	1	1	1	1	1	1	1	4	1	1	1	1	1	1
0896	1	2	8	1	1	1	4	Administrative Rank	7	2	98	3	3	3	2	2	2	2	98	1	3	1	1	1	1	.	.	.	.	.	.	.	0	.	.	.	.	.	.	.	.	.	4	2	1	2	2	2	2
0897	1	3	8	1	1	1	5	Clergy Rank	3	2	98	3	3	3	4	1	2	1	2	1	2	1	1	1	1	1	1	1	1	1	1	1	1	1	1	1	1	1	1	1	1	1	4	2	2	2	2	2	1
0898	2	3	8	4	1	1	5	Professional rank	2	1	1	4	5	3	5	2	2	2	98	1	3	1	4	3	1	.	1	1	1	1	1	1	1	1	1	1	1	1	1	1	1	1	1	2	2	2	2	2	1
0899	2	2	8	4	1	1	5	Professional rank	2	1	98	4	5	5	5	1	2	1	2	1	1	1	4	3	1	1	1	1	1	1	1	1	1	1	1	1	1	1	1	1	1	1	1	2	1	2	2	2	1
0900	1	3	8	1	1	1	1	Administrative Rank	6	1	1	3	5	4	4	2	2	2	98	1	3	1	4	3	0	.	1	1	1	1	1	1	1	1	1	1	1	1	1	1	1	1	4	1	1	2	2	2	1
[truncated: 200 more columns]

## Sheet: Females
IDNumber	var1	var2	var3	var4	var5	var6	var7a	var7b	var8a	var8b	var8c	var9	var10	var11	var12	var13a1	var13a2	var13a3	var13b	var14a	var14b	var15a	var15b	var15c	var16and1	var16and2	var16and3	var16and4	var16and5	var16and6	var16and7	var16and8	var16and9	var16and10	var16and11	var16and12	var16and13	var16and14	var16and15	var16and16	var16and17	var16and18	var17	var18	var19	var20and1	var20and2	var20and3	var20and4
0014	2	2	6	2	1	2	5	Administrative Rank	2	2	98	4	3	3	3	2	2	2	98	1	4	1	7	1	1	1	1	1	1	1	1	1	1	1	1	1	1	1	1	1	1	1	1	2	2	2	2	1	1
0024	2	5	9	1	3	1	1	Administrative Rank	6	2	98	3	5	4	5	2	2	2	98	1	4	1	7	3	1	1	1	1	1	1	1	1	1	1	1	1	1	1	1	1	1	1	4	3	2	2	2	1	1
0025	2	3	8	1	1	2	5	Trader/Artisans/Business	4	2	98	3	5	4	4	1	2	2	2	1	6	1	10	4	1	1	1	1	1	1	1	1	1	1	1	1	1	1	1	1	1	1	1	2	1	2	1	1	1
0027	2	2	6	1	1	1	5	Teaching/Academic Rank	3	1	2	2	3	3	2	1	2	2	2	1	4	1	1	3	1	1	1	1	1	1	1	1	1	1	1	1	1	1	1	1	1	1	4	2	1	2	1	1	1
0030	2	3	8	2	1	1	1	Others	7	1	1	3	5	3	4	2	2	2	98	1	4	1	2	1	1	1	1	1	1	1	1	1	1	1	1	1	1	1	1	1	1	1	4	2	2	2	2	2	2
0033	2	1	5	1	1	2	5	Teaching/Academic Rank	1	2	98	3	4	5	4	1	2	2	2	1	6	1	3	2	1	1	1	1	1	1	1	1	1	1	1	1	1	1	1	1	1	1	4	1	2	2	1	2	2
0035	2	2	8	1	1	2	5	Teaching/Academic Rank	7	2	98	4	3	3	5	1	2	2	2	1	2	1	7	2	1	1	1	1	1	1	1	1	1	1	1	1	1	1	1	1	1	1	4	2	2	2	1	2	2
0037	2	2	6	1	1	1	5	Teaching/Academic Rank	2	1	4	4	3	3	2	1	2	1	3	1	4	1	2	3	1	1	1	1	1	1	1	1	1	1	1	1	1	1	1	1	1	1	4	2	1	2	2	2	2
0039	2	1	6	1	1	1	1	Teaching/Academic Rank	4	2	98	3	5	4	3	2	2	2	98	1	1	1	1	1	.	1	1	1	1	1	1	1	1	1	1	1	1	1	1	1	1	1	1	3	2	2	1	2	2
0041	2	2	8	1	2	2	1	Professional rank	7	1	6	2	3	3	4	2	1	1	98	1	3	1	10	4	1	1	1	1	1	1	1	1	1	1	1	1	1	1	1	1	1	1	1	3	2	2	1	2	2
0047	2	2	8	2	1	1	1	Trader/Artisans/Business	7	2	98	3	4	4	4	1	2	2	3	1	2	1	7	2	1	1	1	1	1	1	1	1	1	1	1	1	1	1	1	1	1	1	1	2	2	1	1	1	1
0051	2	3	7	3	2	2	4	Professional rank	5	1	3	3	4	3	3	2	2	2	98	1	2	1	10	4	1	1	1	1	1	1	1	1	1	1	1	1	1	1	1	1	1	1	4	2	2	2	2	2	2
0052	2	5	8	1	2	1	2	Professional rank	7	2	98	3	3	3	4	2	2	2	98	1	4	1	4	3	.	1	1	1	1	1	1	1	1	1	1	1	1	1	1	1	1	1	1	1	1	2	2	2	2
0054	2	3	9	1	2	2	1	Trader/Artisans/Business	7	1	5	2	2	3	1	1	1	1	1	1	4	1	4	2	1	1	1	1	1	1	1	1	1	1	1	1	1	1	1	1	1	1	4	1	1	2	2	2	2
0061	2	4	8	2	2	1	1	Administrative Rank	6	2	98	3	5	5	4	1	1	1	1	1	3	1	4	3	1	1	1	1	1	1	1	1	1	1	1	1	1	1	1	1	1	1	4	1	1	2	2	2	1
0069	2	3	8	2	1	1	1	Trader/Artisans/Business	3	2	98	3	5	5	5	2	2	2	98	1	4	1	3	3	1	1	1	1	1	1	1	1	1	1	1	1	1	1	1	1	1	1	1	1	1	2	2	2	1
0073	2	2	1	1	1	1	5	Trader/Artisans/Business	4	2	98	4	5	4	5	1	1	1	2	1	1	1	10	4	1	1	1	1	1	1	1	1	1	1	1	1	1	1	1	1	1	1	1	1	2	2	1	2	1
0075	2	1	5	4	1	1	5	Teaching/Academic Rank	1	1	3	3	4	4	3	2	2	2	98	2	6	1	10	4	1	.	1	1	1	1	1	1	1	1	1	1	1	1	1	1	1	1	5	1	2	2	1	2	2
0078	2	1	6	4	1	1	5	Trader/Artisans/Business	1	1	3	3	4	5	3	2	2	2	98	1	4	1	7	2	1	1	.	.	.	.	.	.	0	.	.	.	.	.	.	.	.	.	4	1	1	2	1	2	1
0087	2	2	10	1	1	1	5	Trader/Artisans/Business	1	2	98	4	5	4	5	1	1	1	2	1	1	1	10	4	1	.	1	1	1	1	1	1	1	1	1	1	1	1	1	1	1	1	1	1	2	2	2	2	1
0089	2	4	8	1	2	1	1	Trader/Artisans/Business	2	2	98	4	3	3	5	2	2	2	98	1	3	1	2	1	1	1	1	1	1	1	1	1	1	1	1	1	1	1	1	1	1	1	1	2	2	2	2	2	1
0095	2	5	8	1	2	2	1	Administrative Rank	7	2	98	3	4	4	4	1	1	1	2	1	6	1	10	4	0	.	1	1	1	1	1	1	1	1	1	1	1	1	1	1	1	1	4	2	2	2	2	2	1
0096	2	4	7	1	2	2	1	Administrative Rank	4	1	98	1	1	1	4	1	2	2	2	1	1	1	10	4	0	.	1	1	1	1	1	1	1	1	1	1	1	1	1	1	1	1	1	1	1	2	1	2	1
0097	2	1	6	1	1	1	5	Administrative Rank	4	2	98	4	4	3	4	1	1	1	1	1	1	1	4	2	1	1	1	1	1	1	1	1	1	1	1	1	1	1	1	1	1	1	1	2	1	2	2	2	1
0098	2	3	7	1	1	1	1	Administrative Rank	5	2	98	3	5	4	4	2	2	1	98	1	1	1	10	4	0	.	1	1	1	1	1	1	1	1	1	1	1	1	1	1	1	1	1	3	2	2	1	2	1
0102	2	3	10	4	2	4	1	Administrative Rank	6	2	98	3	4	2	2	1	2	2	2	1	1	1	3	3	1	1	1	1	1	1	1	1	1	1	1	1	1	1	1	1	1	1	1	1	2	1	1	1	1
0107	2	2	5	1	1	1	5	Administrative Rank	1	1	98	3	4	3	3	2	2	2	98	1	4	1	2	3	0	.	1	1	1	1	1	1	1	1	1	1	1	1	1	1	1	1	4	2	2	2	2	2	2
0119	2	3	8	1	1	1	1	Professional rank	4	2	98	4	5	4	4	2	1	1	98	1	1	1	10	4	0	.	1	1	1	1	1	1	1	1	1	1	1	1	1	1	1	1	1	2	2	2	2	2	1
0122	2	3	8	2	2	1	4	Administrative Rank	7	1	98	4	4	5	5	1	2	2	3	1	4	1	4	2	0	.	1	1	1	1	1	1	1	1	1	1	1	1	1	1	1	1	1	2	2	2	2	2	2
0137	2	1	8	1	2	2	2	Administrative Rank	1	2	98	4	5	5	4	2	2	2	98	2	6	1	8	2	0	.	1	1	1	1	1	1	1	1	1	1	1	1	1	1	1	1	1	2	2	3	3	3	3
0139	2	3	7	1	1	1	1	Administrative Rank	3	2	98	3	4	3	3	1	2	2	1	1	6	1	10	4	0	.	1	1	1	1	1	1	1	1	1	1	1	1	1	1	1	1	1	2	2	2	2	2	1
0141	2	3	8	1	2	1	2	Administrative Rank	3	1	1	3	4	5	5	1	1	1	98	1	2	1	8	2	0	.	1	1	1	1	1	1	1	1	1	1	1	1	1	1	1	1	1	1	1	1	1	1	1
0142	2	3	3	1	2	1	4	Administrative Rank	2	1	5	3	3	3	5	2	1	2	98	1	3	1	10	4	0	.	1	1	1	1	1	1	1	1	1	1	1	1	1	1	1	1	4	2	2	2	2	2	2
0144	2	4	9	4	2	1	2	Trader/Artisans/Business	7	1	3	4	3	3	5	2	2	2	98	1	4	1	8	3	1	1	1	1	1	1	1	1	1	1	1	1	1	1	1	1	1	1	1	1	1	2	1	2	1
0150	2	5	6	1	2	2	4	Trader/Artisans/Business	3	2	98	3	4	3	3	2	2	2	98	1	2	1	1	1	0	.	1	1	1	1	1	1	1	1	1	1	1	1	1	1	1	1	1	3	2	3	3	3	3
0154	2	2	6	1	1	1	2	Administrative Rank	4	1	5	2	3	4	2	1	1	1	2	1	3	1	10	4	0	.	1	1	1	1	1	1	1	1	1	1	1	1	1	1	1	1	1	2	1	2	2	2	1
0155	2	2	8	4	1	1	5	Administrative Rank	1	1	3	4	3	3	3	2	2	2	98	1	1	1	8	2	0	.	1	1	1	1	1	1	1	1	1	1	1	1	1	1	1	1	4	3	2	3	3	3	3
0161	2	1	6	2	1	1	5	Trader/Artisans/Business	1	2	98	4	4	5	4	1	1	1	2	1	6	1	10	4	0	1	1	1	1	1	1	1	1	1	1	1	1	1	1	1	1	1	1	1	1	2	2	2	1
0162	2	3	8	1	1	1	1	Trader/Artisans/Business	7	2	98	3	4	4	5	1	1	1	3	1	2	1	2	2	1	1	1	1	1	1	1	1	1	1	1	1	1	1	1	1	1	1	1	1	2	3	3	3	3
0163	2	3	7	4	2	1	4	Trader/Artisans/Business	1	2	98	3	3	2	2	2	2	1	98	1	2	1	4	2	1	1	1	1	1	1	1	1	1	1	1	1	1	1	1	1	1	1	1	2	1	2	1	2	2
0165	2	1	7	2	2	1	1	Administrative Rank	3	1	5	4	5	5	3	2	2	2	98	1	6	1	10	4	0	.	1	1	1	1	1	1	1	1	1	1	1	1	1	1	1	1	1	1	1	2	2	2	1
0166	2	3	6	4	1	1	2	Administrative Rank	3	2	98	4	5	5	4	2	2	2	98	2	6	1	4	2	1	.	1	1	1	1	1	1	1	1	1	1	1	1	1	1	1	1	1	2	2	2	2	2	1
0168	2	1	1	4	1	1	4	Trader/Artisans/Business	1	1	1	3	5	4	5	2	2	1	98	2	6	1	10	4	0	1	.	.	.	.	.	.	0	.	.	.	.	.	.	.	.	.	4	1	2	2	2	2	2
0169	2	4	7	1	2	1	1	Professional rank	3	1	5	4	5	3	5	2	2	2	98	1	1	1	3	1	1	.	.	1	1	1	1	1	1	1	1	1	1	1	1	1	1	1	4	2	2	2	1	2	1
0170	2	5	1	4	2	1	4	Professional rank	4	1	98	4	5	2	4	2	2	2	98	1	1	1	3	3	1	.	1	1	1	1	1	1	1	1	1	1	1	1	1	1	1	1	1	1	1	2	2	2	1
0171	2	4	7	1	2	1	4	Administrative Rank	1	2	98	3	4	4	3	2	1	1	98	1	1	1	10	4	0	.	1	1	1	1	1	1	1	1	1	1	1	1	1	1	1	1	4	1	2	2	1	2	2
0172	2	1	8	1	2	1	1	Administrative Rank	7	2	98	4	5	4	5	2	2	2	98	1	1	1	3	3	1	.	1	1	1	1	1	1	1	1	1	1	1	1	1	1	1	1	1	2	2	2	2	2	1
0176	2	1	6	1	1	1	5	Teaching/Academic Rank	1	2	98	4	5	5	5	2	2	2	98	1	3	1	10	4	0	1	1	1	1	1	1	1	1	1	1	1	1	1	1	1	1	1	1	2	2	2	2	2	1
0187	2	5	1	1	1	1	1	Professional rank	4	1	98	4	3	3	4	2	2	2	98	1	2	1	6	3	1	1	1	1	1	1	1	1	1	1	1	1	1	1	1	1	1	1	1	3	2	2	2	2	2
0198	2	5	8	2	2	1	1	Teaching/Academic Rank	5	2	98	3	3	3	3	1	2	2	2	1	3	1	2	2	0	1	1	1	1	1	1	1	1	1	1	1	1	1	1	1	1	1	4	1	2	2	2	2	2
0201	2	2	1	2	1	1	3	Professional rank	1	1	98	4	5	5	1	2	2	1	98	1	1	1	1	1	1	.	1	1	1	1	1	1	1	1	1	1	1	1	1	1	1	1	1	1	1	1	1	1	1
0202	2	2	8	1	1	1	2	Administrative Rank	2	1	1	3	3	3	4	2	2	2	98	1	1	1	5	2	1	1	1	1	1	1	1	1	1	1	1	1	1	1	1	1	1	1	1	1	1	2	2	2	2
0205	2	2	8	4	1	1	1	Teaching/Academic Rank	7	1	5	3	4	4	3	2	2	2	98	1	6	1	3	3	0	1	1	1	1	1	1	1	1	1	1	1	1	1	1	1	1	1	1	3	2	2	2	2	2
0208	2	4	6	1	2	1	4	Trader/Artisans/Business	3	1	98	3	3	4	1	2	2	2	98	1	1	1	4	3	1	.	1	1	1	1	1	1	1	1	1	1	1	1	1	1	1	1	1	1	1	2	2	2	2
0210	2	4	8	1	2	1	1	Teaching/Academic Rank	4	2	98	3	4	5	4	2	2	1	98	1	3	1	10	4	0	1	1	1	1	1	1	1	1	1	1	1	1	1	1	1	1	1	4	2	1	2	2	2	2
0248	2	2	3	4	1	1	1	Professional rank	4	2	98	4	5	5	4	2	2	2	98	1	3	1	4	3	0	.	1	1	1	1	1	1	1	1	1	1	1	1	1	1	1	1	2	3	3	3	3	3	3
0250	2	3	6	4	1	1	1	Administrative Rank	4	2	98	4	5	5	3	2	2	2	98	1	3	1	3	3	0	.	1	1	1	1	1	1	1	1	1	1	1	1	1	1	1	1	2	2	2	2	1	2	2
0252	2	2	8	1	2	1	1	Administrative Rank	4	2	98	4	5	5	5	2	2	2	98	1	3	1	2	3	0	.	1	1	1	1	1	1	1	1	1	1	1	1	1	1	1	1	2	2	2	2	2	2	2
0253	2	3	6	4	1	1	1	Teaching/Academic Rank	4	2	98	4	5	5	5	2	2	2	98	1	3	1	2	3	0	.	1	1	1	1	1	1	1	1	1	1	1	1	1	1	1	1	2	2	2	2	1	2	2
0254	2	3	6	4	1	1	1	Teaching/Academic Rank	4	2	98	4	5	5	3	2	2	2	98	1	3	1	6	3	0	.	1	1	1	1	1	1	1	1	1	1	1	1	1	1	1	1	2	2	2	2	2	2	2
0255	2	2	6	4	1	1	1	Teaching/Academic Rank	4	2	98	4	5	5	4	2	2	2	98	1	3	1	2	3	0	.	1	1	1	1	1	1	1	1	1	1	1	1	1	1	1	1	2	2	2	2	2	2	2
0256	2	3	6	4	1	1	1	Trader/Artisans/Business	4	2	98	4	5	5	3	2	2	2	98	1	3	1	2	3	0	.	1	1	1	1	1	1	1	1	1	1	1	1	1	1	1	1	2	2	2	2	1	2	2
0257	2	1	6	4	1	1	1	Teaching/Academic Rank	4	2	98	4	5	5	4	2	2	2	98	1	3	1	1	3	0	.	1	1	1	1	1	1	1	1	1	1	1	1	1	1	1	1	2	2	2	2	2	2	2
0258	2	3	6	4	1	1	1	Teaching/Academic Rank	4	2	98	4	5	5	2	2	2	2	98	1	3	1	1	3	0	.	1	1	1	1	1	1	1	1	1	1	1	1	1	1	1	1	2	2	2	2	1	2	2
0259	2	2	6	4	1	1	1	Teaching/Academic Rank	4	2	98	4	5	5	3	2	2	2	98	1	3	1	1	3	0	.	1	1	1	1	1	1	1	1	1	1	1	1	1	1	1	1	2	2	2	3	3	3	3
0263	2	2	8	2	2	1	1	Professional rank	4	2	98	4	5	5	4	2	2	2	98	1	3	1	3	3	0	.	1	1	1	1	1	1	1	1	1	1	1	1	1	1	1	1	2	2	2	2	2	2	2
0264	2	2	8	1	2	3	1	Professional rank	4	2	98	4	5	5	5	2	2	2	98	1	1	1	2	3	0	.	1	1	1	1	1	1	1	1	1	1	1	1	1	1	1	1	2	2	2	3	3	3	3
0267	2	2	8	1	1	2	6	Administrative Rank	4	1	1	3	4	5	4	1	1	1	2	1	3	1	5	2	1	1	1	1	1	1	1	1	1	1	1	1	1	1	1	1	1	1	4	1	2	2	1	2	2
0269	2	2	8	1	1	1	6	Teaching/Academic Rank	4	1	6	3	4	5	4	1	1	1	2	1	3	1	9	2	1	1	1	1	1	1	1	1	1	1	1	1	1	1	1	1	1	1	4	1	2	2	1	2	2
0271	2	3	8	1	1	1	1	Trader/Artisans/Business	4	1	6	3	5	5	4	1	1	1	2	1	3	1	3	2	1	1	1	1	1	1	1	1	1	1	1	1	1	1	1	1	1	1	4	1	2	2	2	2	2
0272	2	3	8	1	2	1	6	Teaching/Academic Rank	6	1	98	3	4	5	4	1	1	1	2	1	3	1	3	2	1	1	1	1	1	1	1	1	1	1	1	1	1	1	1	1	1	1	4	1	2	2	2	2	2
0273	2	2	6	3	1	2	6	Teaching/Academic Rank	1	2	98	4	4	4	4	1	1	1	2	1	3	1	2	2	1	1	1	1	1	1	1	1	1	1	1	1	1	1	1	1	1	1	2	1	2	2	2	2	2
0274	2	4	5	1	3	1	6	Teaching/Academic Rank	2	1	6	3	4	5	4	1	1	1	3	1	3	1	1	2	1	1	1	1	1	1	1	1	1	1	1	1	1	1	1	1	1	1	2	1	2	2	1	2	2
0275	2	5	8	2	5	1	6	Trader/Artisans/Business	4	1	2	3	4	5	4	1	1	1	3	1	3	1	1	2	1	1	1	1	1	1	1	1	1	1	1	1	1	1	1	1	1	1	2	1	2	2	2	2	2
0277	2	2	7	2	3	3	5	Professional rank	1	1	1	4	3	4	5	1	1	1	3	1	3	1	1	2	1	1	1	1	1	1	1	1	1	1	1	1	1	1	1	1	1	1	2	1	2	2	2	2	2
0279	2	3	9	1	2	1	3	Administrative Rank	5	1	1	4	4	5	4	1	1	2	2	1	1	1	1	2	1	1	1	1	1	1	1	1	1	1	.	1	.	1	1	1	1	1	4	1	2	2	2	2	2
0281	2	2	7	1	1	1	1	Administrative Rank	3	2	98	4	5	5	4	2	2	2	98	1	1	1	3	3	1	.	1	1	1	1	1	1	1	1	1	1	1	1	1	1	1	1	3	1	1	2	2	2	2
0282	2	3	7	4	2	1	1	Administrative Rank	5	2	98	3	4	5	4	2	2	2	98	1	1	1	2	3	1	.	1	1	1	1	1	1	1	1	1	1	1	1	1	1	1	1	2	1	1	2	1	2	2
0284	2	5	7	4	5	3	6	Administrative Rank	7	1	1	3	3	3	4	2	2	2	98	1	1	1	1	3	1	.	1	1	1	1	1	1	1	1	1	1	1	1	1	1	1	1	3	1	1	2	1	2	2
0287	2	1	8	1	1	1	2	Administrative Rank	4	1	98	4	5	3	5	2	2	2	98	1	6	1	1	2	1	1	1	1	1	1	1	1	1	1	1	1	1	1	1	1	1	1	2	2	2	2	2	2	2
0288	2	3	8	4	2	1	2	Administrative Rank	6	1	1	4	5	3	2	2	2	2	98	1	3	1	7	2	0	.	1	1	1	1	1	1	1	1	1	1	.	.	.	.	.	.	2	2	1	2	2	2	2
0294	2	3	8	1	2	1	5	Administrative Rank	2	1	98	4	5	5	4	2	2	2	98	1	4	1	3	3	1	1	1	1	.	.	.	1	1	1	1	.	.	.	.	.	.	.	2	1	3	2	1	2	2
0295	2	2	8	1	1	1	5	Administrative Rank	4	1	98	4	4	4	4	1	1	1	2	1	6	1	3	2	1	1	1	1	.	1	1	1	1	1	1	.	.	.	.	.	.	.	2	3	3	2	2	2	2
0296	2	3	8	1	2	1	2	Administrative Rank	7	2	98	3	4	4	4	2	2	2	98	1	2	1	2	3	1	1	1	1	.	1	1	1	1	1	1	1	1	1	1	1	1	1	1	1	2	2	2	2	2
0302	2	3	9	2	1	1	2	Professional rank	4	2	98	4	5	4	1	1	1	1	3	1	4	1	2	3	1	.	1	1	1	1	1	1	1	1	.	1	.	.	1	1	1	1	1	1	1	1	1	1	1
0303	2	3	8	1	1	1	6	Professional rank	5	2	98	4	5	5	5	1	1	1	2	1	5	1	5	3	1	.	1	1	.	1	1	1	1	1	1	.	1	1	.	1	1	1	1	1	1	2	2	2	2
0304	2	3	8	2	1	1	1	Administrative Rank	2	2	98	3	4	5	4	2	2	2	98	1	4	1	5	3	1	.	1	1	1	.	1	1	1	1	.	.	.	1	.	1	1	1	4	2	1	2	2	2	2
0305	2	4	8	2	2	1	2	Administrative Rank	6	2	98	3	3	3	4	1	1	1	2	1	1	1	5	3	1	.	1	1	1	1	1	1	1	1	1	1	1	1	.	1	1	1	2	1	2	2	2	2	2
0306	2	4	8	2	2	1	2	Administrative Rank	7	1	1	4	5	5	5	1	1	1	2	1	6	1	5	3	1	.	1	1	1	1	1	1	1	1	1	1	.	1	1	1	1	1	1	2	2	2	2	2	2
0309	2	3	8	1	2	1	1	Administrative Rank	6	1	6	4	5	3	5	1	1	1	3	1	6	1	6	3	1	.	1	1	1	1	1	1	1	1	1	1	1	1	1	1	1	1	5	1	1	2	2	2	2
0311	2	4	9	1	4	1	1	Administrative Rank	3	1	3	3	5	5	5	2	2	2	98	1	4	1	4	3	1	1	1	1	1	1	1	1	1	1	1	1	1	1	1	1	1	1	2	1	1	2	2	2	2
0317	2	2	8	1	1	2	3	Professional rank	5	2	98	3	4	5	4	1	1	1	2	1	1	1	4	2	1	1	1	1	1	1	1	1	1	1	1	1	.	1	1	1	1	1	4	1	2	2	2	2	2
0318	2	3	8	2	2	1	2	Professional rank	4	2	98	4	5	5	5	2	2	2	98	1	3	1	4	3	0	.	1	1	1	1	1	1	1	1	1	1	1	1	1	1	1	1	2	2	2	2	2	2	2
0319	2	5	8	2	2	1	6	Administrative Rank	4	2	98	4	5	5	5	2	2	2	98	1	3	1	6	3	0	.	1	1	1	1	1	1	1	1	1	1	1	1	.	1	1	1	2	2	2	2	2	2	2
0320	2	2	7	4	2	1	4	Administrative Rank	4	2	98	4	5	5	5	2	2	2	98	1	3	1	4	3	0	.	1	1	.	1	1	.	1	1	.	1	1	.	1	.	.	1	2	2	2	2	2	2	2
0323	2	1	6	3	1	2	2	Administrative Rank	4	2	98	4	5	5	5	2	2	2	98	1	3	1	4	3	0	.	1	1	1	1	1	1	1	1	1	1	1	1	1	.	1	1	2	2	2	2	2	2	2
0324	2	3	8	4	2	1	2	Administrative Rank	5	2	98	4	5	5	5	2	2	2	98	1	3	1	4	3	0	.	1	1	1	.	.	1	1	1	.	1	.	1	1	1	1	1	2	2	2	2	2	2	2
0326	2	1	6	1	1	1	2	Administrative Rank	5	2	98	4	5	5	2	2	2	1	98	1	3	1	4	3	0	.	1	1	1	1	1	1	1	1	1	1	1	1	1	1	1	1	2	2	2	3	3	3	3
0329	2	2	7	1	1	1	2	Others	5	1	98	4	5	5	4	2	2	2	98	1	3	1	6	3	0	1	1	1	.	.	.	.	0	.	1	.	.	.	.	.	.	1	2	2	2	2	2	2	2
0330	2	2	8	3	2	2	2	Administrative Rank	5	2	98	4	5	5	4	2	2	2	98	1	3	1	2	3	0	1	.	.	.	.	.	.	0	.	.	.	.	.	.	.	.	1	2	2	2	2	2	2	2
0331	2	2	9	2	1	1	2	Administrative Rank	5	2	98	4	5	5	4	2	2	2	98	1	3	1	2	3	0	1	.	.	.	.	.	.	0	.	.	.	.	1	.	.	1	.	1	2	2	2	2	2	2
0339	2	2	9	2	1	1	2	Administrative Rank	5	2	98	4	5	5	4	2	2	2	98	1	3	1	6	3	0	1	.	.	.	.	.	.	0	.	1	1	.	1	1	.	.	.	2	2	2	2	2	2	2
0341	2	3	8	3	1	2	2	Teaching/Academic Rank	5	2	98	4	5	5	4	2	2	2	98	1	3	1	1	3	0	1	.	.	.	.	.	.	0	.	1	1	.	1	.	.	.	.	2	2	2	2	2	2	2
0342	2	4	9	2	2	1	2	Teaching/Academic Rank	5	2	98	4	5	5	4	2	2	2	98	1	3	1	1	3	0	1	.	.	.	.	.	.	1	1	.	1	1	.	1	1	.	1	2	2	2	2	2	2	2
0344	2	4	8	1	2	1	2	Teaching/Academic Rank	5	2	98	4	5	5	4	2	2	2	98	1	3	1	1	3	0	1	.	.	.	.	.	.	1	.	.	1	.	.	1	.	.	.	2	2	2	2	2	2	2
0346	2	3	9	2	2	1	2	Teaching/Academic Rank	5	2	98	4	5	5	4	2	2	2	98	1	3	1	3	3	0	1	.	.	.	.	.	.	0	1	.	1	.	1	1	1	.	1	2	2	2	2	2	2	2
0347	2	2	7	3	1	2	2	Trader/Artisans/Business	5	2	98	4	5	5	4	2	2	2	98	1	3	1	3	3	0	1	.	.	.	.	.	.	0	.	.	1	.	.	1	.	.	1	2	2	2	2	2	2	2
0348	2	3	6	1	2	1	3	Teaching/Academic Rank	2	2	98	3	4	2	1	1	2	2	2	1	3	1	3	3	1	.	1	1	1	1	1	1	1	1	1	1	1	1	1	1	1	1	4	1	2	2	2	2	2
0349	2	1	9	2	2	1	4	Trader/Artisans/Business	5	1	98	4	4	4	5	1	1	1	2	1	4	1	3	3	1	1	1	1	1	1	1	1	1	1	1	1	1	1	1	1	1	1	2	2	2	2	2	2	2
0351	2	2	6	1	1	1	2	Trader/Artisans/Business	5	2	98	4	5	5	5	2	2	2	98	1	3	1	6	3	1	1	1	1	1	1	1	1	1	1	1	1	1	1	1	1	1	1	2	2	2	2	2	2	2
0352	2	2	8	2	1	1	2	Teaching/Academic Rank	5	2	98	4	5	5	5	2	2	2	98	1	3	1	3	3	1	1	1	1	1	1	1	1	1	1	1	1	1	1	1	1	1	1	2	2	2	2	2	2	2
0354	2	4	8	2	2	1	2	Teaching/Academic Rank	5	2	98	4	5	5	3	2	2	2	98	1	3	1	5	3	1	1	1	1	1	1	1	1	1	1	1	1	1	1	1	1	1	1	2	2	2	2	2	2	2
0356	2	4	8	1	1	1	2	Professional rank	5	2	98	4	5	5	5	2	2	2	98	1	3	1	1	3	1	1	1	1	1	1	1	1	1	1	1	1	1	1	1	1	1	1	2	2	2	2	2	2	2
0360	2	4	8	1	2	1	2	Professional rank	7	2	98	4	3	3	4	2	2	2	98	1	1	1	1	3	1	.	1	1	1	1	1	1	1	1	1	1	1	1	1	1	1	1	1	1	2	2	2	2	1
0361	2	4	6	1	2	1	3	Administrative Rank	4	2	98	3	3	3	4	2	2	2	98	1	1	1	5	3	1	.	1	1	1	1	1	1	1	1	1	1	1	1	1	1	1	1	3	1	1	2	2	2	2
0362	2	4	7	1	2	1	1	Trader/Artisans/Business	5	2	98	3	3	4	4	2	2	2	98	1	1	1	5	3	1	.	1	1	1	1	1	1	1	1	1	1	1	1	1	1	1	1	2	1	1	2	2	2	1
0364	2	3	7	2	1	1	5	Professional rank	5	1	98	4	5	5	5	1	1	1	2	1	1	1	6	3	1	.	1	1	1	1	1	1	1	1	1	1	1	1	1	1	1	1	1	2	2	2	2	2	2
0365	2	2	6	2	1	1	5	Professional rank	5	1	98	4	5	5	5	2	2	2	98	1	1	1	9	3	1	.	1	1	1	1	1	1	1	1	1	1	1	1	1	1	1	1	2	1	1	2	2	2	2
0366	2	3	6	1	1	1	5	Professional rank	5	1	98	4	5	5	98	1	1	1	2	1	1	1	6	3	1	.	1	1	1	1	1	1	1	1	1	1	1	1	1	1	1	1	1	2	1	2	2	2	1
0367	2	1	8	4	1	1	4	Professional rank	5	2	98	4	5	5	4	2	2	2	98	1	3	1	9	3	0	.	.	.	.	.	.	.	0	.	.	.	.	.	.	.	.	.	2	2	2	2	2	2	1
0368	2	2	5	1	1	1	2	Professional rank	5	1	98	4	5	5	5	2	2	2	98	1	1	1	9	3	1	.	1	1	1	1	1	1	1	1	1	1	1	1	1	1	1	1	2	3	3	2	2	2	1
0372	2	3	8	3	2	2	6	Teaching/Academic Rank	2	1	1	3	3	3	4	1	1	1	2	1	6	1	4	3	1	.	1	1	1	1	1	1	1	1	1	1	1	1	1	1	1	1	2	1	1	2	1	2	1
0374	2	5	7	2	2	1	1	Administrative Rank	7	2	98	3	4	5	4	2	2	2	98	1	1	1	8	3	1	.	1	1	1	1	1	1	1	1	1	1	1	1	1	1	1	1	2	1	1	2	2	2	2
0375	2	3	8	2	2	1	2	Administrative Rank	7	1	1	3	4	3	5	2	2	2	98	1	2	1	8	3	1	.	1	1	1	1	1	1	1	1	1	1	1	1	1	1	1	1	4	1	1	2	1	2	2
0383	2	4	7	2	1	2	1	Administrative Rank	6	2	98	3	3	3	4	2	2	2	98	1	1	1	8	3	1	.	1	1	1	1	1	1	1	1	1	1	1	1	1	1	1	1	3	1	1	2	1	2	2
0384	2	4	7	3	2	2	1	Clergy Rank	6	2	98	3	3	3	4	2	2	2	98	1	1	1	8	3	1	.	1	1	1	1	1	1	1	1	1	1	1	1	1	1	1	1	3	1	1	2	1	2	1
0389	2	3	5	2	2	1	3	Teaching/Academic Rank	1	1	1	4	5	5	5	2	2	2	98	2	6	1	8	1	0	.	.	.	.	.	.	.	0	.	.	.	.	.	.	.	.	.	2	3	3	3	3	3	3
0392	2	3	4	1	2	2	2	Teaching/Academic Rank	5	1	98	4	3	3	3	2	2	2	98	1	6	1	10	4	0	.	1	1	1	1	1	1	1	1	1	1	1	1	1	1	1	1	2	3	3	2	1	2	2
0396	2	4	6	2	2	1	4	Administrative Rank	5	1	98	3	5	5	4	1	1	1	2	1	1	1	1	2	0	1	1	1	1	1	1	1	1	1	1	1	1	1	1	1	1	1	2	3	3	2	2	2	1
0399	2	4	7	4	2	1	1	Teaching/Academic Rank	6	1	1	3	4	4	4	1	1	1	2	1	4	1	3	3	1	.	1	1	1	1	1	1	1	1	1	1	1	1	1	1	1	1	4	1	2	2	2	2	1
0401	2	1	7	1	1	1	6	Teaching/Academic Rank	5	2	98	3	3	3	5	1	1	1	1	1	6	1	3	1	0	.	.	.	.	.	.	.	0	.	.	.	.	.	.	.	.	.	4	1	3	3	3	3	3
0405	2	2	6	1	1	2	5	Teaching/Academic Rank	5	1	98	2	4	2	4	2	2	2	98	1	2	1	2	2	0	1	.	.	.	.	.	.	0	.	.	.	.	.	.	.	.	.	4	2	2	2	2	2	1
0406	2	1	5	2	1	1	4	Trader/Artisans/Business	5	2	98	4	5	5	4	2	2	2	98	2	6	1	4	1	0	.	.	.	.	.	.	.	0	.	.	.	.	.	.	.	.	.	2	3	3	3	3	3	3
0407	2	4	10	2	1	1	4	Teaching/Academic Rank	4	2	98	3	5	4	3	1	1	2	2	1	6	1	10	4	0	.	1	1	1	1	1	1	1	1	1	1	1	1	1	1	1	1	5	2	2	2	2	2	1
0410	2	2	6	2	1	1	1	Administrative Rank	5	2	98	4	5	5	2	2	2	2	98	1	6	1	4	3	1	1	1	1	1	1	1	1	1	1	1	1	1	1	1	1	1	1	2	1	1	2	2	2	2
0411	2	1	7	1	1	1	5	Administrative Rank	5	2	98	3	5	4	1	2	2	2	98	1	6	1	4	3	0	1	1	1	1	1	1	1	1	1	1	1	1	1	1	1	1	1	2	2	2	2	2	2	1
0413	2	4	6	2	2	1	4	Administrative Rank	1	2	98	3	4	4	4	1	2	2	2	1	1	1	10	4	0	.	.	.	.	.	.	.	0	.	.	.	.	.	.	.	.	.	2	2	2	2	2	2	1
0414	2	4	7	4	2	1	1	Administrative Rank	3	1	1	4	5	5	4	2	2	2	98	1	4	1	1	3	0	1	1	1	1	1	1	1	1	1	1	1	1	1	1	1	1	1	4	2	2	2	2	2	2
0417	2	3	8	4	1	1	3	Administrative Rank	5	1	98	3	4	3	5	1	1	1	2	1	4	1	10	4	0	.	1	1	1	1	1	1	1	1	1	1	1	1	1	1	1	1	1	3	3	2	2	2	2
0423	2	4	6	4	2	1	4	Administrative Rank	6	2	98	4	5	5	5	1	1	1	3	1	3	1	4	3	1	.	1	1	1	1	1	1	1	1	1	1	1	1	1	1	1	1	1	1	2	2	2	2	1
0425	2	1	3	1	1	1	3	Administrative Rank	5	1	98	3	4	4	5	2	2	2	98	1	3	1	1	1	0	.	1	1	1	1	1	1	1	1	1	1	1	1	1	1	1	1	2	2	2	1	1	1	1
0426	2	2	6	1	1	2	5	Administrative Rank	5	1	98	3	4	3	4	2	2	2	98	2	6	1	9	3	0	1	.	.	.	.	.	.	0	.	.	.	.	.	.	.	.	.	2	1	2	2	2	2	1
0427	2	3	8	1	2	1	5	Administrative Rank	6	1	1	4	4	5	4	1	1	1	1	1	3	1	9	3	1	1	1	1	1	1	1	1	1	1	1	1	1	1	1	1	1	1	1	1	1	3	3	3	3
0428	2	2	3	1	1	1	5	Teaching/Academic Rank	5	2	98	3	5	5	2	2	2	2	98	1	6	1	10	4	1	.	.	.	.	.	.	.	0	.	.	.	.	.	.	.	.	.	2	2	3	2	2	2	2
0430	2	1	8	2	1	1	5	Teaching/Academic Rank	5	2	98	3	5	4	5	2	1	1	98	2	6	1	10	4	0	.	.	.	.	.	.	.	0	.	.	.	.	.	.	.	.	.	2	2	2	2	2	2	1
0431	2	1	8	1	1	1	5	Trader/Artisans/Business	5	1	1	4	5	4	5	1	1	1	1	1	2	1	4	3	0	.	.	.	.	.	.	.	0	.	.	.	.	.	.	.	.	.	2	2	2	2	2	2	1
0432	2	1	3	2	1	1	3	Teaching/Academic Rank	5	2	98	3	3	3	3	1	1	1	2	2	6	1	4	3	1	.	.	.	.	.	.	.	0	.	.	.	.	.	.	.	.	.	2	3	3	2	2	2	1
0435	2	1	6	4	1	1	5	Administrative Rank	7	2	98	3	4	3	5	2	2	2	98	2	6	1	1	1	0	1	.	.	.	.	.	.	0	.	.	.	.	.	.	.	.	.	2	2	3	2	2	2	2
0436	2	1	6	4	1	1	5	Administrative Rank	5	1	98	4	5	5	4	2	2	2	98	1	1	1	4	1	1	1	1	1	1	1	1	1	1	1	1	1	1	1	1	1	1	1	2	1	1	2	2	2	1
0439	2	1	4	1	2	1	1	Administrative Rank	7	2	98	3	4	5	4	1	1	1	2	2	6	1	10	4	1	1	1	1	1	1	1	1	1	1	1	1	1	1	1	1	1	1	4	3	2	1	1	1	1
0441	2	5	8	1	2	2	1	Administrative Rank	7	2	98	4	5	5	5	2	2	2	98	1	3	1	4	3	0	1	1	1	1	1	1	1	1	1	1	1	1	1	1	1	1	1	4	1	1	2	2	2	2
0442	2	4	8	1	2	1	2	Administrative Rank	7	2	98	4	5	5	5	2	2	2	98	1	2	1	1	3	1	.	1	1	1	1	1	1	1	1	1	1	1	1	1	1	1	1	1	2	2	2	2	2	1
0444	2	2	8	2	1	1	5	Teaching/Academic Rank	4	2	98	4	3	3	5	2	2	2	98	1	1	1	4	3	1	1	1	1	1	1	1	1	1	1	1	1	1	1	1	1	1	1	2	3	2	2	2	2	1
0445	2	2	8	1	1	1	5	Teaching/Academic Rank	4	1	1	2	3	4	4	1	1	1	2	1	1	1	4	3	1	1	1	1	1	1	1	1	1	1	1	1	1	1	1	1	1	1	1	1	2	2	2	2	1
0449	2	2	10	1	1	1	5	Professional rank	5	2	98	4	5	5	4	2	2	2	98	1	6	1	4	3	1	.	1	1	1	1	1	1	1	1	1	1	1	1	1	1	1	1	2	3	1	2	2	2	2
0912	2	1	6	1	1	2	4	Trader/Artisans/Business	5	2	98	4	5	4	5	2	2	2	98	1	3	1	10	4	1	1	.	.	.	.	.	.	0	.	.	.	.	.	.	.	.	.	4	1	2	2	2	2	1
0913	2	3	6	1	1	2	4	Trader/Artisans/Business	2	1	98	2	5	4	98	2	2	1	98	1	2	1	7	2	0	.	.	.	.	.	.	.	0	.	.	.	.	.	.	.	.	.	4	3	3	3	3	3	3
0914	2	2	6	1	2	2	3	Teaching/Academic Rank	1	2	98	4	5	5	5	2	2	2	98	1	4	1	4	3	1	1	1	1	1	1	1	1	1	1	1	1	1	1	1	1	1	1	4	1	1	1	1	1	1
0915	2	3	1	4	1	1	6	Trader/Artisans/Business	3	2	98	4	5	3	5	2	2	2	98	1	2	1	4	3	1	1	1	1	1	1	1	1	1	1	1	1	1	1	1	1	1	1	4	1	1	2	2	2	1
0916	2	3	8	4	2	1	4	Trader/Artisans/Business	2	2	98	3	4	5	2	2	2	1	98	1	2	1	10	4	0	.	.	.	.	.	.	.	0	.	.	.	.	.	.	.	.	.	4	3	3	3	3	3	3
0918	2	1	6	1	1	1	1	Trader/Artisans/Business	5	2	98	3	5	5	5	2	2	2	98	1	6	1	4	3	1	1	1	1	1	1	1	1	1	1	1	1	1	1	1	1	1	1	4	1	1	2	2	2	2
0919	2	1	6	1	1	2	4	Others	2	2	98	4	5	5	3	1	2	1	2	1	6	1	10	4	0	1	1	1	1	1	1	1	1	1	1	1	1	1	1	1	1	1	4	2	2	2	2	2	2
0926	2	1	5	1	1	1	5	Administrative Rank	2	1	98	4	3	3	1	2	2	2	98	1	3	1	1	1	1	1	.	.	.	.	.	.	0	.	.	.	.	.	.	.	.	.	4	1	2	2	2	2	2
0935	2	5	6	2	2	1	3	Professional rank	3	2	98	4	5	5	5	2	2	2	98	1	4	1	2	3	1	1	1	1	1	1	1	1	1	1	1	1	1	1	1	1	1	1	4	1	1	2	2	2	1
0936	2	2	7	1	1	1	1	Administrative Rank	6	1	1	4	5	5	5	2	2	2	98	1	3	1	2	3	1	1	.	.	.	.	.	.	0	.	.	.	.	.	.	.	.	.	4	1	1	2	2	2	1
0939	2	3	9	4	1	1	2	Trader/Artisans/Business	7	2	98	3	4	4	5	2	2	2	98	1	2	1	1	1	1	1	1	1	1	1	1	1	1	1	1	1	1	1	1	1	1	1	1	1	1	2	2	2	1
0940	2	2	8	4	2	1	3	Trader/Artisans/Business	5	1	1	4	5	5	5	2	2	2	98	1	4	1	1	3	1	1	1	1	1	1	1	1	1	1	1	1	1	1	1	1	1	1	1	1	1	2	2	2	1
0941	2	2	9	4	2	1	1	Teaching/Academic Rank	7	2	98	4	5	5	5	2	2	2	98	1	4	1	1	3	1	1	1	1	1	1	1	1	1	1	1	1	1	1	1	1	1	1	4	1	1	2	2	2	2
0942	2	1	6	1	1	1	5	Trader/Artisans/Business	2	1	98	4	5	5	5	2	2	2	98	1	4	1	1	3	1	1	1	1	1	1	1	1	1	1	1	1	1	1	1	1	1	1	4	1	1	2	2	2	2
0949	2	3	6	1	1	2	4	Teaching/Academic Rank	2	1	98	4	5	5	98	2	2	1	98	2	2	1	10	4	1	.	.	.	.	.	.	.	0	.	.	.	.	.	.	.	.	.	4	2	2	2	2	2	1
0951	2	2	8	1	1	2	2	Teaching/Academic Rank	7	2	98	4	3	3	3	2	2	2	98	1	4	1	9	2	1	.	.	1	1	1	1	1	1	1	1	1	1	1	1	1	1	1	1	1	2	2	2	2	1
0956	2	4	6	1	1	1	5	Administrative Rank	2	1	98	2	4	5	98	2	2	2	98	2	2	1	7	2	1	1	.	.	.	.	.	.	0	.	.	.	.	.	.	.	.	.	4	1	1	2	2	2	1
0957	2	3	8	4	2	1	4	Trader/Artisans/Business	2	1	98	3	4	4	5	2	2	2	98	1	2	1	4	3	1	1	1	1	1	1	1	1	1	1	1	1	1	1	1	1	1	1	4	1	2	1	1	1	1
0959	2	3	9	1	1	1	1	Professional rank	6	2	98	2	5	5	5	2	2	2	98	1	1	1	4	3	1	1	1	1	1	1	1	1	1	1	1	1	1	1	1	1	1	1	4	3	3	3	3	3	3
0961	2	3	9	3	2	1	4	Trader/Artisans/Business	5	2	98	4	5	5	5	2	2	2	98	1	3	1	1	3	1	1	1	1	1	1	1	1	1	1	1	1	1	1	1	1	1	1	4	1	1	2	2	2	1
0975	2	3	7	2	2	1	5	Administrative Rank	2	2	98	4	5	5	98	2	2	2	98	1	2	1	2	3	1	1	1	1	1	1	1	1	1	1	1	1	1	1	1	1	1	1	5	1	3	2	2	2	1
0976	2	3	7	2	1	1	1	Administrative Rank	7	2	98	4	5	4	5	2	2	2	98	1	6	1	2	3	0	.	.	.	.	.	.	.	0	.	.	.	.	.	.	.	.	.	5	3	3	3	3	3	3
0978	2	3	9	1	1	1	2	Professional rank	6	1	6	4	5	5	5	2	2	2	98	1	3	1	2	1	1	.	1	1	1	1	1	1	1	1	1	1	1	1	1	1	1	1	5	2	2	2	2	2	2
0979	2	3	8	2	1	1	1	Professional rank	2	1	98	4	3	3	4	2	2	2	98	1	2	1	10	4	0	.	1	1	1	1	1	1	1	1	1	1	1	1	1	1	1	1	5	3	2	2	2	2	2
0995	2	1	5	4	1	1	4	Administrative Rank	3	1	98	3	4	2	5	2	2	2	98	1	3	1	6	3	1	.	.	.	.	.	.	.	0	.	.	.	.	.	.	.	.	.	1	2	1	2	2	2	2
0996	2	5	8	1	2	1	6	Administrative Rank	1	1	98	3	4	4	5	1	2	1	1	1	1	1	4	3	1	.	1	1	1	1	1	1	1	1	1	1	1	1	1	1	1	1	5	2	2	2	2	2	2
0997	2	1	5	1	1	1	5	Administrative Rank	3	1	3	4	4	4	98	2	2	2	98	1	1	1	7	2	1	1	.	.	.	.	.	.	0	.	.	.	.	.	.	.	.	.	4	1	2	2	2	2	2
0999	2	3	6	2	3	1	4	Trader/Artisans/Business	6	2	98	3	4	4	4	1	2	2	2	1	3	1	10	4	1	.	1	1	1	1	1	1	1	1	1	1	1	1	1	1	1	1	5	2	2	2	2	2	1
1000	2	2	8	1	1	1	5	Teaching/Academic Rank	3	1	98	4	4	4	4	2	2	2	98	1	2	1	4	3	1	.	1	1	1	1	1	1	1	1	1	1	1	1	1	1	1	1	4	1	2	2	2	2	1
1006	2	3	8	1	2	1	2	Teaching/Academic Rank	7	1	1	3	4	4	4	1	2	1	1	1	1	1	4	2	1	.	1	1	1	1	1	1	1	1	1	1	1	1	1	1	1	1	2	2	2	2	2	2	2
1007	2	4	8	1	2	1	1	Professional rank	5	1	1	3	5	5	5	1	2	1	2	1	3	1	4	3	1	.	1	1	1	1	1	1	1	1	1	1	1	1	1	1	1	1	1	1	2	1	1	1	1
1012	2	3	8	1	2	1	1	Administrative Rank	6	1	98	4	3	3	98	2	2	2	98	1	4	1	4	3	1	.	1	1	1	1	1	1	1	1	1	1	1	1	1	1	1	1	4	2	2	2	2	2	1
1015	2	3	7	1	2	1	4	Administrative Rank	7	2	98	3	3	3	4	2	2	2	98	1	3	1	4	3	0	.	.	.	.	.	.	.	0	.	.	.	.	.	.	.	.	.	5	3	3	3	3	3	3
1025	2	4	2	3	2	2	6	Administrative Rank	5	1	98	4	2	4	2	2	2	2	98	1	3	1	2	3	1	.	1	1	1	1	1	1	1	1	1	1	1	1	1	1	1	1	4	1	2	2	2	2	1
1027	2	5	6	1	2	2	4	Trader/Artisans/Business	3	2	98	4	5	5	3	1	2	1	2	1	4	1	7	2	0	.	1	1	1	1	1	1	1	1	1	1	1	1	1	1	1	1	4	1	1	2	2	2	1
1028	2	3	8	3	1	1	4	Trader/Artisans/Business	5	2	98	4	3	3	5	2	2	2	98	1	3	1	10	4	1	.	1	1	1	1	1	1	1	1	1	1	1	1	1	1	1	1	4	2	2	2	2	2	1
1031	2	3	7	1	2	1	4	Teaching/Academic Rank	2	2	98	3	4	3	4	2	2	2	98	1	4	1	2	3	0	.	.	.	.	.	.	.	0	.	.	.	.	.	.	.	.	.	1	3	3	2	2	2	2
1035	2	3	7	1	1	1	5	Administrative Rank	6	2	98	3	3	3	4	2	2	2	98	1	4	1	10	4	1	.	1	1	1	1	1	1	1	1	1	1	1	1	1	1	1	1	5	3	3	3	3	3	3
1050	2	4	7	1	2	1	1	Administrative Rank	3	2	98	3	4	4	4	1	1	1	2	1	3	1	10	4	1	.	.	.	.	.	.	.	0	.	.	.	.	.	.	.	.	.	4	1	1	2	2	2	1
1051	2	3	8	4	2	1	1	Administrative Rank	7	1	1	3	3	3	4	2	2	2	98	1	3	1	3	2	1	.	1	1	1	1	1	1	1	1	1	1	1	1	1	1	1	1	4	2	2	2	2	2	1
1057	2	2	8	2	1	1	5	Trader/Artisans/Business	3	2	98	3	4	4	1	2	2	2	98	1	1	1	10	4	1	1	1	1	1	1	1	1	1	1	1	1	1	1	1	1	1	1	1	2	2	2	2	2	2
1061	2	2	7	1	1	1	6	Administrative Rank	5	2	98	3	4	4	3	2	2	2	98	2	2	1	10	4	0	1	1	1	1	1	1	1	1	1	1	1	1	1	1	1	1	1	5	2	2	2	2	2	1
1063	2	2	8	2	1	1	5	Administrative Rank	3	1	1	4	4	4	5	2	2	2	98	1	2	1	7	2	1	1	1	1	1	1	1	1	1	1	1	1	1	1	1	1	1	1	2	1	2	2	2	2	2
1065	2	1	5	2	1	1	5	Professional rank	3	2	98	3	4	3	4	2	2	2	98	2	2	1	10	4	0	.	.	.	.	.	.	.	0	.	.	.	.	.	.	.	1	1	5	1	2	2	2	2	2
1070	2	2	8	1	1	2	5	Trader/Artisans/Business	3	2	98	3	5	5	4	2	2	2	98	1	4	1	1	2	1	1	1	1	1	1	1	1	1	1	1	1	1	1	1	1	1	1	5	2	2	2	2	2	2
1071	2	5	8	4	2	1	1	Trader/Artisans/Business	7	1	1	2	3	3	2	1	2	1	2	1	3	1	1	3	1	1	1	1	1	1	1	1	1	1	1	1	1	1	1	1	1	1	4	2	2	2	2	2	1
1073	2	5	6	4	2	2	4	Trader/Artisans/Business	3	2	98	3	3	3	5	2	2	2	98	1	3	1	10	4	0	.	.	.	.	.	.	.	0	.	.	.	.	.	.	.	1	1	5	2	2	2	2	2	2
1075	2	2	6	1	1	2	2	Trader/Artisans/Business	3	2	98	3	4	4	5	2	2	2	98	1	6	1	1	3	1	.	1	1	1	1	1	1	1	1	1	1	1	1	1	1	1	1	5	2	2	1	1	1	1
1077	2	3	7	2	1	1	5	Trader/Artisans/Business	2	2	98	3	3	3	4	2	2	2	98	1	3	1	10	4	1	1	1	1	1	1	1	1	1	1	1	1	1	1	1	1	1	1	5	1	2	2	2	2	1
1079	2	4	7	1	2	1	1	Administrative Rank	4	2	98	3	4	4	4	1	2	2	3	1	4	1	10	4	.	.	1	1	1	1	1	1	1	1	1	1	1	1	1	1	1	1	4	2	2	2	2	2	1
1092	2	1	6	1	1	1	4	Professional rank	5	2	98	3	5	3	4	2	2	2	98	1	3	1	7	2	1	1	1	1	1	1	1	1	1	1	1	1	1	1	1	1	1	1	5	1	2	2	2	2	1
1093	2	3	6	2	1	1	5	Professional rank	3	2	98	3	5	4	4	2	2	2	98	1	3	1	4	3	1	.	1	1	1	1	1	1	1	1	1	1	1	1	1	1	1	1	5	1	1	2	2	2	2
1094	2	1	6	1	1	1	5	Administrative Rank	3	2	98	3	4	5	5	2	2	2	98	1	1	1	10	4	1	1	.	.	.	.	.	.	0	.	.	.	.	.	.	.	.	.	5	1	1	2	2	2	2
1095	2	4	7	3	1	1	5	Administrative Rank	1	1	1	3	5	5	4	2	2	2	98	1	3	1	7	2	0	.	.	.	.	.	.	.	0	.	.	.	.	.	.	.	.	.	5	2	3	2	2	2	2
1096	2	2	8	1	1	1	5	Administrative Rank	3	1	1	2	4	4	4	2	2	2	98	1	3	1	4	2	1	.	1	1	1	1	1	1	1	1	1	1	1	1	1	1	1	1	4	3	3	2	2	2	2
1097	2	2	6	1	1	2	3	Teaching/Academic Rank	3	2	98	3	3	3	3	2	2	2	98	1	3	1	4	3	1	.	1	1	1	1	1	1	1	1	1	1	1	1	1	1	1	1	4	1	1	2	2	2	1
1098	2	5	3	2	2	1	6	Teaching/Academic Rank	3	2	98	2	3	3	1	1	2	1	2	1	3	1	7	2	1	.	1	1	1	1	1	1	1	1	1	1	1	1	1	1	1	1	5	2	2	2	2	2	1
1099	2	3	6	1	2	1	6	Teaching/Academic Rank	6	2	98	3	3	3	4	2	2	2	98	1	2	1	10	4	1	.	.	.	.	.	.	.	0	.	.	.	.	.	.	1	.	.	5	2	2	2	2	2	1
1102	2	2	9	2	1	1	5	Trader/Artisans/Business	3	2	98	3	5	5	4	2	2	2	98	1	6	1	7	2	1	1	.	.	.	.	.	.	0	.	.	.	.	.	.	.	.	1	5	1	1	2	2	2	1
1103	2	2	6	1	1	2	5	Teaching/Academic Rank	3	2	98	3	5	4	4	2	2	2	98	1	2	1	7	2	1	1	1	1	1	1	1	1	1	1	1	1	1	1	1	1	1	1	1	2	1	2	2	2	1
1105	2	2	9	2	1	1	5	Teaching/Academic Rank	3	2	98	4	3	2	1	2	2	2	98	1	2	1	7	2	1	1	1	1	1	1	1	1	1	1	1	1	1	1	1	1	1	1	2	1	2	2	2	2	1
1106	2	2	8	2	1	1	5	Trader/Artisans/Business	3	2	98	3	4	4	3	1	2	2	2	1	1	1	7	2	1	.	.	.	.	.	.	.	0	.	.	1	.	.	.	.	.	.	1	2	1	2	2	2	1
1109	2	1	5	1	1	1	5	Teaching/Academic Rank	3	2	98	4	5	5	1	2	2	2	98	1	6	1	10	4	0	.	.	.	.	.	.	.	0	.	.	1	.	.	.	.	.	.	5	2	2	2	2	2	2
1110	2	2	6	1	1	1	3	Trader/Artisans/Business	3	2	98	4	5	4	2	2	2	1	98	1	2	1	10	4	0	.	.	.	.	.	.	.	0	.	.	1	1	1	.	.	.	.	4	2	2	2	2	2	1
1115	2	5	3	2	2	1	6	Trader/Artisans/Business	3	2	98	1	4	4	3	2	2	1	98	1	3	1	10	4	1	.	1	1	1	1	1	1	1	1	1	1	1	1	1	1	1	1	4	2	2	2	2	2	2
1119	2	1	5	1	1	1	5	Trader/Artisans/Business	2	2	3	3	4	4	5	2	2	2	98	1	1	1	7	2	1	.	.	.	.	.	.	.	0	.	.	.	.	1	.	.	.	.	5	1	1	2	2	2	2
1120	2	4	8	4	2	1	1	Teaching/Academic Rank	4	2	98	2	4	3	3	2	1	1	98	1	2	1	5	2	1	1	1	1	1	1	1	1	1	1	1	1	1	1	1	1	1	1	4	1	2	2	2	2	2
1125	2	3	8	1	2	1	6	Professional rank	4	2	98	3	4	5	5	1	2	2	3	1	4	1	5	3	1	1	1	1	1	1	1	1	1	1	1	1	1	1	1	1	1	1	4	2	3	2	2	2	2
1137	2	5	5	2	2	1	6	Administrative Rank	7	2	98	4	3	3	5	2	2	2	98	1	6	1	10	4	0	.	.	.	.	.	.	.	0	.	.	.	.	.	.	.	.	.	5	1	1	3	3	3	3
1139	2	2	6	2	1	1	5	Administrative Rank	1	2	98	4	4	5	4	1	2	2	2	1	1	1	7	2	1	1	1	1	1	1	1	1	1	1	1	1	1	1	1	1	1	1	3	1	2	2	2	2	2
1140	2	3	8	1	2	1	5	Clergy Rank	1	1	1	4	5	5	5	2	2	2	98	1	4	1	4	3	0	1	1	1	1	1	1	1	1	1	1	1	1	1	1	1	1	1	5	1	2	1	1	1	1
1145	2	3	8	1	1	1	5	Administrative Rank	4	1	1	3	3	3	5	2	2	2	98	1	4	1	10	4	1	1	1	1	1	1	1	1	1	1	1	1	1	1	1	1	1	1	4	2	1	1	1	1	1
1153	2	2	6	1	1	2	5	Trader/Artisans/Business	1	1	1	3	3	3	5	2	2	2	98	1	2	1	10	4	0	1	1	1	1	1	1	1	1	1	1	1	1	1	1	1	1	1	5	2	2	1	1	1	1
1161	2	1	6	1	1	1	5	Trader/Artisans/Business	1	2	98	3	3	3	3	2	2	1	98	1	4	1	10	4	1	1	1	1	1	1	1	1	1	1	1	1	1	1	1	1	1	1	5	1	1	1	1	1	1
1170	2	5	2	1	2	1	3	Professional rank	5	1	3	3	2	3	3	1	1	1	2	1	2	1	10	4	1	1	1	1	1	1	1	1	1	1	1	1	1	1	1	1	1	1	4	2	2	2	2	2	2
1172	2	1	6	1	2	1	5	Administrative Rank	3	2	98	4	5	5	3	1	1	1	3	1	1	1	6	3	1	.	.	.	.	.	.	.	0	.	.	.	.	.	.	.	.	.	5	2	1	2	2	2	2
1176	2	1	5	1	1	1	5	Administrative Rank	1	2	98	4	5	5	1	2	2	1	98	1	1	1	10	4	0	1	1	1	1	1	1	1	1	1	1	1	1	1	1	1	1	1	4	2	1	2	2	2	2
1177	2	1	5	1	1	1	5	Administrative Rank	1	2	98	3	5	4	2	2	2	2	98	1	3	1	7	2	0	.	1	1	1	1	1	1	1	1	1	1	1	1	1	1	1	1	2	1	2	2	2	2	2
1179	2	4	9	1	1	1	1	Administrative Rank	7	1	1	4	5	3	2	2	2	2	98	1	3	1	1	1	0	.	.	.	.	.	.	.	0	.	.	.	.	.	.	.	.	.	5	1	2	2	2	2	2
1186	2	1	6	2	1	1	5	Administrative Rank	1	2	98	3	3	4	4	2	2	2	98	1	2	1	7	2	0	1	1	1	1	1	1	1	1	1	1	1	1	1	1	1	1	1	4	1	1	2	2	2	2
1188	2	2	6	2	1	1	4	Administrative Rank	3	2	98	4	5	4	3	2	2	1	98	1	4	1	9	3	1	1	1	1	1	1	1	1	1	.	1	1	1	1	1	1	1	1	5	1	1	1	1	1	1
1190	2	4	8	1	2	1	4	Administrative Rank	4	2	98	4	5	5	5	2	2	2	98	1	3	1	9	3	0	.	.	.	.	.	.	.	0	.	.	.	1	.	.	.	.	.	4	2	2	2	2	2	2
1202	2	4	6	1	1	2	3	Administrative Rank	3	2	98	3	5	5	5	2	2	2	98	1	4	1	4	2	1	1	1	1	1	1	1	1	1	1	1	1	1	1	1	1	1	1	4	1	1	2	2	2	2
1209	2	4	7	2	2	1	2	Teaching/Academic Rank	7	2	98	3	4	4	4	1	2	2	2	1	4	1	4	3	1	.	1	1	1	1	1	1	1	1	1	1	1	1	1	1	1	1	1	1	1	2	2	2	2
1212	2	4	8	1	2	2	2	Professional rank	7	2	98	3	4	4	4	2	2	2	98	1	4	1	2	3	0	.	1	1	1	1	1	1	1	.	1	1	1	1	1	1	1	1	4	1	2	2	2	2	2
1215	2	4	7	2	2	1	4	Administrative Rank	7	2	98	3	4	4	4	1	2	2	2	1	4	1	2	3	0	1	1	1	1	1	1	1	1	1	1	1	1	1	1	1	1	1	4	1	1	2	2	2	2
1222	2	4	7	1	2	1	6	Others	7	1	1	3	4	4	5	2	2	2	98	1	4	1	7	2	0	1	1	1	1	1	1	1	1	1	1	1	1	1	1	1	1	1	4	1	1	2	2	2	2
1228	2	4	7	1	2	2	1	Administrative Rank	7	1	98	3	4	4	4	1	2	2	3	1	4	1	6	3	1	.	1	1	1	1	1	1	1	1	1	1	1	1	1	1	1	1	4	1	1	2	2	2	2
1231	2	3	6	2	2	1	4	Professional rank	6	2	98	3	4	4	4	2	2	2	98	1	1	1	10	4	0	.	1	1	1	1	1	1	1	1	1	1	1	1	1	1	1	1	5	1	2	2	2	2	2
1234	2	2	9	1	1	2	5	Administrative Rank	1	2	98	3	4	3	4	2	2	2	98	1	4	1	7	2	0	1	1	1	1	1	1	1	1	1	1	1	1	1	1	1	1	1	1	2	2	2	2	2	2
1238	2	5	8	2	2	1	4	Trader/Artisans/Business	5	1	6	3	5	4	3	2	2	1	98	1	2	1	6	3	0	1	1	1	1	1	1	1	1	1	1	1	1	1	1	1	1	1	2	1	1	2	2	2	2
1240	2	1	6	2	1	1	5	Trader/Artisans/Business	1	2	98	3	5	4	3	2	2	2	98	1	1	1	7	2	1	1	1	1	1	1	1	1	1	1	1	1	1	1	1	1	1	1	4	1	1	2	2	2	2
1245	2	1	5	1	1	2	5	Professional rank	1	2	98	3	5	5	1	1	2	1	2	2	3	1	10	4	0	1	.	.	.	.	.	.	0	.	.	.	1	.	.	.	.	.	1	2	1	2	2	2	2
1248	2	1	5	1	1	1	5	Professional rank	3	2	98	3	4	5	2	2	2	2	98	1	4	1	10	4	0	.	.	.	.	.	.	.	0	.	.	.	.	.	.	.	.	.	4	2	1	1	1	1	1
1249	2	1	6	1	1	1	5	Administrative Rank	7	2	98	3	4	5	2	2	2	1	98	2	2	1	7	2	0	.	1	1	1	1	1	1	1	1	1	1	1	1	1	1	1	1	4	1	2	2	2	2	2
1250	2	1	5	1	1	1	5	Administrative Rank	1	2	98	4	5	4	2	2	2	1	98	1	2	1	7	2	1	1	1	1	1	1	1	1	1	1	1	1	1	1	1	1	1	1	2	1	2	2	2	2	2
1251	2	1	5	2	1	1	5	Administrative Rank	1	2	98	3	4	2	4	2	2	2	98	1	3	1	6	3	1	1	.	.	.	.	.	.	0	.	.	.	.	.	.	.	.	.	1	1	1	2	2	2	2
1256	2	3	7	1	1	1	1	Trader/Artisans/Business	2	2	98	3	4	3	1	1	2	1	2	1	2	1	7	2	0	.	.	.	.	.	.	.	0	.	.	.	.	.	.	.	.	.	2	1	1	2	2	2	2
1264	2	4	6	1	4	1	4	Teaching/Academic Rank	7	2	98	3	4	4	4	2	2	2	98	1	3	1	10	4	0	1	1	1	1	1	1	1	1	1	1	1	1	1	1	1	1	1	2	1	2	2	2	2	2
1265	2	2	8	1	2	2	5	Trader/Artisans/Business	4	1	1	4	5	5	5	2	2	2	98	1	4	1	6	3	1	1	1	1	1	1	1	1	1	1	1	1	1	1	1	1	1	1	5	1	1	1	1	1	1
1268	2	2	8	1	1	2	5	Teaching/Academic Rank	1	1	3	4	4	5	5	2	2	2	98	1	4	1	6	3	1	1	1	1	1	1	1	1	1	1	1	1	1	1	1	1	1	1	2	1	1	2	2	2	2
1272	2	5	2	1	5	2	3	Teaching/Academic Rank	5	1	1	3	3	4	4	1	2	2	2	1	6	1	10	4	1	1	1	1	1	1	1	1	1	1	1	1	1	1	1	1	1	1	4	1	2	2	2	2	2
1276	2	5	7	2	2	1	3	Teaching/Academic Rank	7	2	98	3	4	4	4	1	2	2	2	1	4	1	6	3	1	.	1	1	1	1	1	1	1	1	1	1	1	1	1	1	1	1	4	1	1	2	2	2	2
1277	2	5	8	2	2	1	2	Trader/Artisans/Business	3	2	98	4	4	5	4	1	2	2	2	1	4	1	7	2	0	.	1	1	1	1	1	1	1	1	1	1	1	1	1	1	1	1	5	1	2	2	2	2	2
1281	2	2	7	2	1	1	1	Teaching/Academic Rank	4	2	98	3	4	4	4	2	2	2	98	1	3	1	6	3	0	.	.	.	.	.	.	.	0	.	1	.	.	.	.	.	.	.	1	2	2	2	2	2	2
1282	2	3	8	2	2	1	1	Professional rank	3	2	98	3	4	5	4	1	2	2	2	1	4	1	7	2	0	.	1	1	1	1	1	1	1	1	1	1	1	1	1	1	1	1	2	1	2	2	2	2	2
1284	2	2	9	2	2	1	2	Trader/Artisans/Business	7	2	98	4	4	3	4	2	2	2	98	1	4	1	7	2	0	1	1	1	1	1	1	1	1	1	1	1	1	1	1	1	1	1	4	2	2	2	2	2	1
1289	2	1	5	2	1	1	5	Professional rank	1	2	98	4	5	5	5	1	2	2	2	1	4	1	7	2	0	1	1	1	1	1	1	1	1	1	1	1	1	1	1	1	1	1	1	2	2	2	2	2	2
1296	2	1	6	3	2	2	5	Administrative Rank	6	2	98	4	4	3	4	2	2	2	98	1	4	1	7	2	0	1	1	1	1	1	1	1	1	1	1	1	1	1	1	1	1	1	4	2	2	2	2	2	2
1302	2	3	5	2	1	1	3	Professional rank	2	2	98	3	4	4	5	1	2	2	2	1	3	1	6	3	0	.	1	1	1	1	1	1	1	1	1	1	1	1	1	1	1	1	4	1	2	2	2	2	1
1304	2	5	7	2	2	1	5	Administrative Rank	7	2	98	3	4	4	4	1	2	2	2	1	4	1	6	3	1	.	1	1	1	1	1	1	1	1	1	1	1	1	1	1	1	1	2	1	1	2	2	2	1
1310	2	3	8	1	2	2	6	Trader/Artisans/Business	3	2	98	4	5	5	4	2	2	2	98	1	4	1	7	2	0	1	1	1	1	1	1	1	1	1	1	1	1	1	1	1	1	1	4	2	2	2	2	2	1
1315	2	3	6	1	2	2	3	Trader/Artisans/Business	3	2	98	3	4	4	5	1	2	2	2	1	4	1	6	3	0	.	1	1	1	1	1	1	1	1	1	1	1	1	1	1	1	1	5	1	2	2	2	2	2
1333	2	3	7	1	2	1	1	Administrative Rank	4	2	98	3	4	5	4	1	2	2	2	1	3	1	6	3	0	.	1	1	1	1	1	1	1	1	1	1	1	1	1	1	1	1	4	1	2	2	2	2	1
1340	2	3	8	1	2	1	2	Administrative Rank	6	2	98	3	5	4	5	1	2	2	2	1	3	1	6	3	0	.	1	1	1	1	1	1	1	1	1	1	1	1	1	1	1	1	4	1	2	2	2	2	1
1357	2	5	6	2	2	1	1	Administrative Rank	6	2	98	4	3	4	4	2	2	2	98	1	4	1	6	3	1	.	.	.	.	.	.	.	0	.	.	.	.	.	.	.	.	.	5	1	1	2	2	2	1
1358	2	5	9	2	2	1	1	Administrative Rank	7	1	1	3	3	3	4	2	2	2	98	1	1	1	6	3	1	1	1	1	1	1	1	1	1	1	1	1	1	1	1	1	1	1	5	1	1	2	2	2	1
1359	2	3	7	1	2	2	3	Administrative Rank	6	2	98	3	3	3	4	2	2	2	98	1	1	1	6	3	1	1	1	1	1	1	1	1	1	1	1	1	1	1	1	1	1	1	4	1	1	2	2	2	1
1371	2	1	5	4	1	1	5	Professional rank	1	2	98	4	5	5	5	2	2	2	98	1	1	1	6	3	1	1	.	.	.	.	.	.	0	.	.	.	.	.	1	1	.	.	4	1	2	2	2	2	1
1375	2	1	5	2	1	1	5	Administrative Rank	6	2	98	3	4	5	3	2	2	2	98	2	6	1	10	4	1	.	.	.	.	.	.	.	0	.	.	.	.	.	1	1	.	.	2	1	2	2	2	2	2
1376	2	1	6	1	1	1	5	Administrative Rank	6	2	98	4	5	5	5	2	2	2	98	1	2	1	1	1	0	.	.	.	.	.	.	.	0	.	.	.	.	.	1	1	.	.	4	1	1	2	2	2	1
1379	2	4	5	1	2	1	4	Administrative Rank	1	2	98	3	3	4	4	1	1	1	2	2	3	1	7	2	1	1	1	1	1	1	1	1	1	1	1	1	1	1	1	1	1	1	4	1	2	2	2	2	2
1386	2	3	8	1	1	2	6	Administrative Rank	3	1	1	3	4	5	4	2	2	2	98	1	2	1	7	2	1	.	1	1	1	1	1	1	1	1	1	1	1	1	1	1	1	1	4	1	1	2	2	2	2
1387	2	2	8	1	1	2	5	Trader/Artisans/Business	1	2	98	3	4	4	4	2	2	2	98	2	3	1	6	3	1	1	1	1	1	1	1	1	1	1	1	1	1	1	1	1	1	1	4	1	1	1	1	1	1
1392	2	1	6	1	1	1	5	Administrative Rank	1	2	98	4	5	5	4	1	2	2	2	1	6	1	7	2	1	.	1	1	1	1	1	1	1	1	1	1	1	1	1	1	1	1	1	1	2	2	2	2	2
1395	2	5	5	2	1	1	5	Teaching/Academic Rank	6	2	98	3	4	3	3	2	2	2	98	1	3	1	1	1	1	1	1	1	1	1	1	1	1	1	1	1	1	1	1	1	1	1	4	1	2	2	2	2	2
1397	2	5	5	1	1	1	5	Trader/Artisans/Business	1	2	98	3	4	4	4	2	2	2	98	2	3	1	7	2	0	.	1	1	1	1	1	1	1	1	1	1	1	1	1	1	1	1	1	1	1	2	2	2	2
1398	2	2	9	1	1	2	5	Trader/Artisans/Business	6	2	98	4	5	5	1	2	2	2	98	1	4	1	10	4	1	1	1	1	1	1	1	1	1	1	1	1	1	1	1	1	1	1	4	1	2	2	2	2	2
1399	2	2	6	2	1	1	5	Trader/Artisans/Business	1	2	98	4	3	3	2	2	2	2	98	1	3	1	7	2	1	1	1	1	1	1	1	1	1	1	1	1	1	1	1	1	1	1	5	1	1	2	2	2	2
1403	2	2	7	2	1	1	2	Professional rank	5	1	1	3	4	5	4	2	2	2	98	1	4	1	6	3	1	1	1	1	1	1	1	1	1	1	1	1	1	1	1	1	1	1	5	1	1	1	1	1	1
1404	2	4	7	1	2	1	2	Professional rank	7	2	98	3	4	4	4	1	2	2	2	1	3	1	7	2	0	1	1	1	1	1	1	1	1	1	1	1	1	1	1	1	1	1	4	2	1	2	2	2	2
1406	2	5	6	2	5	1	4	Professional rank	2	2	98	3	2	2	3	2	2	2	98	1	6	1	6	3	1	.	1	1	1	1	1	1	1	1	1	1	1	1	1	1	1	1	4	3	2	2	2	2	2
1408	2	3	8	1	2	1	1	Administrative Rank	4	1	4	3	3	4	3	2	2	2	98	1	1	1	6	3	1	1	1	1	1	1	1	1	1	1	1	1	1	1	1	1	1	1	3	1	1	2	2	2	2
1410	2	2	7	1	2	1	1	Trader/Artisans/Business	7	2	98	3	4	4	4	2	2	2	98	1	2	1	1	1	0	1	.	1	.	.	.	.	0	.	.	.	.	.	.	.	.	.	5	2	2	2	2	2	2
1411	2	5	8	2	2	1	6	Trader/Artisans/Business	3	2	98	3	3	4	4	1	2	1	2	1	4	1	6	3	0	1	1	1	1	1	1	1	1	1	1	1	1	1	1	1	1	1	5	2	2	2	2	2	2
1412	2	2	6	1	1	2	5	Trader/Artisans/Business	6	2	98	3	4	3	3	2	2	2	98	1	1	1	6	3	0	.	.	.	.	.	.	.	0	.	.	.	.	.	.	1	.	.	5	3	3	2	2	2	2
1414	2	2	6	1	1	2	5	Trader/Artisans/Business	1	2	98	4	5	5	5	2	2	2	98	1	1	1	6	3	1	1	.	1	.	.	.	.	0	.	.	.	.	.	.	1	.	.	2	1	2	2	2	2	2
1415	2	2	6	2	1	1	5	Professional rank	6	2	98	3	4	3	5	2	2	2	98	1	2	1	7	2	1	.	1	1	1	1	1	1	1	1	1	1	1	1	1	1	1	1	5	3	3	2	2	2	2
1416	2	3	7	1	1	1	1	Professional rank	3	2	98	4	3	3	4	2	2	2	98	1	1	1	6	3	0	.	1	1	1	1	1	1	1	1	1	1	1	1	1	1	1	1	5	1	2	2	2	2	2
1418	2	2	6	2	1	2	5	Administrative Rank	6	2	98	4	3	3	4	2	2	2	98	1	1	1	6	3	0	.	1	1	1	1	1	1	1	1	1	1	1	1	1	1	1	1	4	1	2	2	2	2	2
1426	2	2	6	1	1	2	5	Teaching/Academic Rank	6	2	98	4	3	3	4	2	2	2	98	1	1	1	6	3	0	.	1	1	1	1	1	1	1	1	1	1	1	1	1	1	1	1	4	1	2	2	2	2	2
1428	2	1	6	4	1	1	5	Teaching/Academic Rank	6	2	98	3	4	3	3	2	2	2	98	1	1	1	6	3	0	.	.	1	.	.	.	.	0	.	.	.	.	.	.	.	.	.	5	3	3	2	2	2	2
1431	2	1	6	1	1	1	5	Trader/Artisans/Business	1	2	98	4	4	4	4	2	2	2	98	1	3	1	7	2	1	.	.	.	.	.	.	.	0	.	.	.	.	.	.	.	.	.	4	2	2	2	2	2	2
1432	2	1	6	1	1	1	5	Teaching/Academic Rank	1	2	98	4	5	4	3	2	2	2	98	1	4	1	6	3	1	1	.	.	.	.	.	.	0	.	.	.	.	.	.	.	.	.	5	1	1	2	2	2	2
1439	2	2	6	1	2	1	1	Teaching/Academic Rank	3	1	3	3	4	5	3	1	2	2	2	1	1	1	7	2	0	.	.	1	.	.	.	.	0	.	.	.	.	.	1	.	.	.	5	2	1	2	2	2	2
1440	2	5	5	1	1	1	6	Professional rank	6	2	98	4	4	2	4	2	2	2	98	1	3	1	7	2	1	1	1	1	1	1	1	1	1	1	1	1	1	1	1	1	1	1	5	2	1	2	2	2	2
1441	2	3	8	1	1	2	5	Administrative Rank	3	1	98	3	4	5	3	2	2	2	98	1	3	1	7	2	1	.	.	.	.	.	.	.	0	.	.	.	.	.	1	.	.	.	1	1	1	1	1	1	1
1444	2	2	6	1	1	2	5	Professional rank	1	2	98	4	5	3	4	2	2	1	2	1	3	1	7	2	1	1	1	1	1	1	1	1	1	1	1	1	1	1	1	1	1	1	5	2	1	2	2	2	2
1447	2	1	3	1	1	1	5	Professional rank	6	2	98	3	5	4	2	2	2	2	98	1	6	1	10	4	1	1	1	1	1	1	1	1	1	1	1	1	1	1	1	1	1	1	5	2	2	2	2	2	2
1448	2	6	3	1	2	1	4	Professional rank	1	2	98	2	5	5	4	1	2	1	2	1	4	1	6	3	0	1	1	1	1	1	1	1	1	1	1	1	1	1	1	1	1	1	5	2	2	2	2	2	2
1452	2	1	5	2	1	1	5	Trader/Artisans/Business	6	2	98	4	4	4	5	2	2	2	98	2	3	1	7	2	0	1	.	.	.	.	.	.	0	.	.	.	.	.	.	.	.	.	5	1	2	2	2	2	2
1454	2	2	8	1	1	2	5	Administrative Rank	1	2	98	4	5	3	3	2	2	2	98	1	2	1	10	4	0	.	.	.	.	.	.	.	0	.	.	.	.	.	.	.	.	.	4	1	2	2	2	2	2
1456	2	3	9	1	1	1	5	Administrative Rank	1	2	98	4	5	5	5	1	2	2	2	2	3	1	7	2	1	1	.	.	.	.	.	.	0	.	.	.	.	.	.	.	.	.	2	1	1	2	2	2	2
1459	2	3	7	1	1	1	1	Professional rank	6	2	98	3	3	3	5	2	2	2	98	1	4	1	6	3	1	1	1	1	1	1	1	1	1	1	1	1	1	1	1	1	1	1	3	1	1	2	2	2	2
1460	2	1	5	1	1	1	5	Professional rank	1	2	98	4	5	4	4	1	2	1	2	2	4	1	7	2	1	.	1	1	1	1	1	1	1	1	1	1	1	1	1	1	1	1	1	2	1	2	2	2	2
1464	2	3	8	1	1	1	5	Trader/Artisans/Business	6	2	98	4	5	5	5	2	2	2	98	1	6	1	10	4	1	1	.	.	.	.	.	.	0	.	.	.	.	.	.	.	.	.	4	1	2	2	2	2	2
1466	2	2	8	1	1	1	5	Teaching/Academic Rank	6	2	98	2	3	3	2	1	2	2	1	1	6	1	10	4	0	.	.	.	.	.	.	.	0	.	.	.	.	.	.	.	.	.	4	2	2	2	2	2	2
1468	2	3	6	2	2	1	3	Trader/Artisans/Business	6	2	98	2	3	3	2	1	2	2	2	1	6	1	10	4	0	.	.	.	.	.	.	.	0	.	.	.	.	.	.	.	.	.	4	2	2	2	2	2	2
1469	2	1	5	1	1	2	5	Trader/Artisans/Business	1	2	98	4	5	5	1	1	2	1	2	2	6	1	10	4	0	.	1	1	1	1	1	1	1	1	1	1	1	1	1	1	1	1	4	2	2	2	2	2	2
1472	2	2	7	1	1	2	4	Teaching/Academic Rank	3	2	98	4	5	5	5	2	2	2	98	2	3	1	1	1	0	.	.	.	.	.	.	.	0	.	.	.	.	.	.	.	.	.	5	1	2	2	2	2	2
1473	2	4	3	4	1	1	3	Trader/Artisans/Business	6	2	98	2	3	3	2	1	2	2	2	1	6	1	10	4	0	.	.	.	.	.	.	.	0	.	.	.	.	.	.	.	.	.	5	2	2	2	2	2	2
1479	2	2	6	1	1	2	5	Trader/Artisans/Business	1	2	98	4	5	5	1	2	2	2	98	2	2	1	7	2	0	.	1	1	1	1	1	1	1	1	1	1	1	1	1	1	1	1	4	1	1	2	2	2	2
1483	2	1	5	1	1	1	5	Trader/Artisans/Business	1	2	98	4	5	5	5	2	2	2	98	2	3	1	7	2	1	.	1	1	1	1	1	1	1	1	1	1	1	1	1	1	1	1	4	2	1	2	2	2	2
1484	2	3	7	2	1	1	1	Trader/Artisans/Business	4	2	98	4	5	5	5	2	2	2	98	1	3	1	6	3	0	.	1	1	1	1	1	1	1	1	1	1	1	1	1	1	1	1	4	1	1	2	2	2	2
1486	2	1	6	1	1	1	6	Trader/Artisans/Business	1	2	98	3	5	3	5	2	2	2	98	1	6	1	7	2	0	1	.	.	.	.	.	.	0	.	.	.	.	.	.	.	.	.	5	1	2	2	2	2	2
1488	2	1	6	2	1	1	5	Professional rank	6	2	98	2	4	3	5	2	2	2	98	1	2	1	6	3	1	.	1	1	1	1	1	1	1	1	1	1	1	1	1	1	1	1	5	2	1	2	2	2	2
1490	2	1	5	4	1	1	5	Administrative Rank	2	2	98	4	5	5	4	2	2	2	98	1	3	1	10	4	1	1	1	1	1	1	1	1	1	1	1	1	1	1	1	1	1	1	1	1	2	2	2	2	2
1491	2	1	5	2	1	1	5	Administrative Rank	1	2	98	4	4	5	1	2	2	2	98	1	3	1	7	2	0	.	1	1	1	1	1	1	1	1	1	1	1	1	1	1	1	1	4	2	1	2	2	2	2
1492	2	1	6	1	1	1	5	Administrative Rank	1	2	98	3	3	4	3	2	2	2	98	1	3	1	10	4	1	1	.	.	.	.	.	.	0	.	.	.	.	.	.	.	.	.	4	1	2	2	2	2	2
1494	2	2	6	4	1	1	5	Administrative Rank	7	2	98	3	4	3	5	2	2	2	98	1	2	1	7	2	1	.	1	1	1	1	1	1	1	1	1	1	1	1	1	1	1	1	2	3	3	2	2	2	2
1495	2	3	8	3	1	2	1	Administrative Rank	6	2	98	3	3	2	3	1	1	2	2	1	3	1	1	1	0	.	.	.	.	.	.	.	0	.	.	.	.	.	.	.	.	.	5	1	2	2	2	2	2
1496	2	5	4	4	2	2	4	Administrative Rank	7	2	98	2	3	3	2	1	2	2	2	1	6	1	10	4	0	.	.	.	.	.	.	.	0	.	.	.	.	.	.	.	.	.	5	2	2	2	2	2	2
1497	2	5	1	2	2	1	4	Administrative Rank	7	2	98	2	3	3	2	1	2	2	2	1	6	1	10	4	0	.	.	.	.	.	.	.	0	.	.	.	.	.	.	.	.	.	4	2	2	2	2	2	2
1498	2	5	6	2	2	1	2	Administrative Rank	6	1	1	2	3	3	2	1	2	2	2	1	6	1	10	4	0	.	.	.	.	.	.	.	0	.	.	.	.	.	.	.	.	.	5	2	2	2	2	2	2
1501	2	1	5	1	1	2	5	Administrative Rank	1	2	98	4	4	5	1	2	2	2	98	1	3	1	7	2	1	.	.	.	.	.	.	.	0	.	.	.	.	.	.	.	.	.	1	2	1	2	2	2	2
1503	2	4	8	2	5	2	2	Administrative Rank	6	2	98	3	5	1	1	1	1	1	1	1	3	1	10	4	0	.	.	.	.	.	.	.	0	.	.	.	.	.	.	.	.	.	2	1	2	2	2	2	2
1504	2	1	5	4	1	1	5	Administrative Rank	1	2	98	4	5	5	5	2	2	2	98	1	1	1	10	4	1	1	.	.	.	.	.	.	0	.	.	.	.	.	.	.	.	.	1	1	2	2	2	2	2
1505	2	1	5	2	1	1	5	Administrative Rank	7	2	98	4	5	5	1	2	2	2	98	1	4	1	10	4	1	1	1	1	1	1	1	1	1	1	1	1	1	1	1	1	1	1	1	1	2	2	2	2	2
1506	2	6	9	4	5	2	6	Administrative Rank	7	2	98	2	3	3	2	1	2	2	1	2	6	1	10	4	0	.	.	.	.	.	.	.	0	.	.	.	.	.	.	.	.	.	5	2	2	2	2	2	2
1507	2	2	7	2	1	1	4	Administrative Rank	2	2	98	4	4	4	4	1	2	2	2	1	2	1	7	2	1	.	1	1	1	1	1	1	1	1	1	1	1	1	1	1	1	1	4	1	2	1	1	1	1
1508	2	6	7	2	2	1	1	Trader/Artisans/Business	2	1	1	3	4	4	2	1	2	1	2	1	3	1	6	3	1	1	1	1	1	1	1	1	1	1	1	1	1	1	1	1	1	1	4	1	2	2	2	2	2
1511	2	6	6	1	1	1	5	Trader/Artisans/Business	1	2	98	3	4	5	3	2	2	2	98	1	6	1	6	3	0	.	.	.	.	.	.	.	0	.	.	.	.	.	.	.	.	.	4	1	1	1	1	1	1
1512	2	2	7	2	1	1	5	Teaching/Academic Rank	1	2	98	4	4	4	3	2	2	2	98	1	2	1	1	1	1	.	1	1	1	1	1	1	1	1	1	1	1	1	1	1	1	1	4	2	1	1	1	1	1
1514	2	2	6	2	2	1	4	Professional rank	1	2	98	3	4	5	4	2	2	1	98	1	6	1	6	3	0	1	1	1	1	1	1	1	1	1	1	1	1	1	1	1	1	1	4	1	1	2	2	2	2
1518	2	6	10	4	5	2	6	Administrative Rank	7	2	98	3	5	5	2	2	2	2	98	1	6	1	10	4	1	1	1	1	1	1	1	1	1	1	1	1	1	1	1	1	1	1	5	2	2	2	2	2	2
1520	2	1	3	2	1	1	5	Administrative Rank	1	2	98	3	5	5	4	2	2	2	98	1	6	1	10	4	1	1	1	1	1	1	1	1	1	1	1	1	1	1	1	1	1	1	4	2	2	2	2	2	2
1521	2	3	8	1	1	1	2	Administrative Rank	7	2	98	3	3	3	4	2	2	2	98	1	4	1	6	3	1	1	1	1	1	1	1	1	1	1	1	1	1	1	1	1	1	1	5	1	1	2	2	2	2
1522	2	3	6	1	2	2	4	Administrative Rank	7	2	98	3	5	5	3	2	2	2	98	1	6	1	10	4	1	1	1	1	1	1	1	1	1	1	1	1	1	1	1	1	1	1	5	2	2	2	2	2	2
1524	2	2	6	1	1	1	5	Trader/Artisans/Business	7	2	98	3	5	5	4	2	2	2	98	1	1	1	6	3	1	1	.	.	.	.	.	.	0	.	.	.	.	.	.	.	.	.	4	3	3	3	3	3	3
1527	2	2	8	1	1	1	5	Teaching/Academic Rank	1	2	98	4	5	4	5	2	2	2	98	2	6	1	10	4	1	1	1	1	1	1	1	1	1	1	1	1	1	1	1	1	1	1	5	2	2	2	2	2	2
1528	2	6	10	4	5	2	6	Professional rank	7	2	98	3	4	5	3	2	2	2	98	2	6	1	10	4	1	.	.	.	.	.	.	.	0	.	.	.	.	.	.	.	.	.	5	1	2	2	2	2	2
1530	2	6	7	1	1	2	5	Administrative Rank	1	2	98	4	5	5	4	2	2	2	98	1	3	1	7	2	1	1	1	1	1	1	1	1	1	1	1	1	1	1	1	1	1	1	4	2	2	2	2	2	2
1531	2	3	6	1	1	2	4	Administrative Rank	2	2	98	3	3	3	4	2	2	2	98	1	4	1	6	3	1	1	.	.	.	.	.	.	0	.	.	.	.	.	.	.	.	.	5	2	1	2	2	2	2
1536	2	5	7	2	2	1	1	Administrative Rank	4	2	98	3	3	5	5	2	2	2	98	1	1	1	10	4	1	1	1	1	1	1	1	1	1	1	1	1	1	1	1	1	1	1	4	1	2	1	1	1	1
1537	2	2	6	1	1	2	5	Administrative Rank	1	2	98	4	5	5	4	2	2	2	98	1	3	1	7	2	1	1	1	1	1	1	1	1	1	1	1	1	1	1	1	1	1	1	4	1	2	2	2	2	2
1538	2	2	8	1	1	1	5	Trader/Artisans/Business	1	2	98	4	5	4	5	1	2	1	2	2	6	1	10	4	0	.	.	.	.	.	.	.	0	.	.	.	.	.	.	.	.	.	5	2	2	2	2	2	2
1542	2	2	6	1	1	1	5	Administrative Rank	7	2	98	2	3	3	2	1	2	2	2	1	6	1	10	4	0	.	.	.	.	.	.	.	0	.	.	.	.	.	.	.	.	.	4	2	2	2	2	2	2
1544	2	4	6	3	1	2	1	Administrative Rank	5	2	98	2	3	3	2	1	2	2	2	1	3	1	10	4	0	.	.	.	.	.	.	.	1	.	.	.	.	.	.	.	.	.	2	3	3	2	2	2	2
1549	2	1	6	1	1	1	5	Administrative Rank	7	2	98	4	5	5	5	2	2	2	98	1	6	1	10	4	1	1	.	.	.	.	.	.	0	.	.	.	.	.	.	.	.	.	5	1	2	2	2	2	2
1550	2	2	6	1	1	1	4	Administrative Rank	3	2	98	3	4	4	4	2	2	2	98	2	3	1	10	4	0	1	1	1	1	1	1	1	1	1	1	1	1	1	1	1	1	1	4	2	2	2	2	2	2
1556	2	3	6	2	1	1	1	Trader/Artisans/Business	7	2	98	2	3	3	2	1	2	2	2	1	2	1	10	4	0	.	.	.	.	.	.	.	0	.	.	.	.	.	.	.	.	.	5	1	2	2	2	2	2
1558	2	6	7	1	5	2	2	Trader/Artisans/Business	7	2	98	3	4	5	5	1	2	2	2	1	3	1	1	1	1	1	1	1	1	1	1	1	1	1	1	1	1	1	1	1	1	1	4	1	1	2	2	2	2
1559	2	5	5	1	5	2	3	Administrative Rank	4	1	1	3	4	4	4	1	2	2	2	1	6	1	10	4	1	1	1	1	1	1	1	1	1	1	1	1	1	1	1	1	1	1	1	1	1	2	2	2	2
1560	2	5	7	1	2	1	1	Administrative Rank	7	2	98	4	4	4	4	2	2	2	98	1	2	1	7	2	1	.	1	1	1	1	1	1	1	1	1	1	1	1	1	1	1	1	2	1	2	2	2	2	2
1562	2	3	7	1	2	1	1	Professional rank	5	2	98	4	5	5	5	2	2	2	98	1	4	1	7	2	1	.	1	1	1	1	1	1	1	1	1	1	1	1	1	1	1	1	1	2	2	2	2	2	2
1564	2	3	9	1	1	2	1	Professional rank	7	1	1	4	4	5	5	2	2	2	98	1	4	1	10	4	1	1	1	1	1	1	1	1	1	1	1	1	1	1	1	1	1	1	4	1	1	2	2	2	2
1565	2	3	8	2	2	1	1	Administrative Rank	4	2	98	3	5	5	5	2	2	2	98	1	1	1	7	2	1	1	1	1	1	1	1	1	1	1	1	1	1	1	1	1	1	1	4	1	1	1	1	1	1
1566	2	2	9	1	1	1	1	Administrative Rank	7	2	98	4	4	4	4	2	2	2	98	1	3	1	10	4	0	1	1	1	1	1	1	1	1	1	1	1	1	1	1	1	1	1	4	2	2	2	2	2	2
1568	2	3	9	1	1	1	1	Trader/Artisans/Business	7	2	98	4	3	2	4	1	2	2	2	2	4	1	7	2	0	1	.	.	.	.	.	.	0	.	.	.	.	.	.	.	.	.	1	1	2	2	2	2	2
1578	2	3	7	1	1	1	1	Administrative Rank	3	2	98	3	4	4	5	2	2	2	98	2	4	1	10	4	1	1	1	1	1	1	1	1	1	1	1	1	1	1	1	1	1	1	4	1	1	2	2	2	2
1583	2	3	7	2	2	1	6	Trader/Artisans/Business	2	2	98	4	5	5	3	2	2	2	98	1	4	1	10	4	1	1	1	1	1	1	1	1	1	1	1	1	1	1	1	1	1	1	4	1	1	2	2	2	2
1584	2	2	7	2	1	2	5	Trader/Artisans/Business	7	2	98	3	5	5	4	2	2	2	98	1	2	1	7	2	1	1	.	.	.	.	.	.	0	.	.	.	.	.	.	.	.	.	5	1	1	2	2	2	2
1586	2	2	7	4	1	1	5	Teaching/Academic Rank	7	2	98	3	5	5	4	2	2	2	98	1	2	1	7	2	1	1	.	.	.	.	.	.	0	.	.	.	.	.	.	.	.	.	5	1	1	2	2	2	2
1588	2	3	8	2	2	1	1	Teaching/Academic Rank	4	2	98	3	3	4	5	2	2	2	98	1	3	1	10	4	1	1	1	1	1	1	1	1	1	1	1	1	1	1	1	1	1	1	3	1	1	2	2	2	2
1589	2	3	7	1	1	1	4	Trader/Artisans/Business	2	2	98	3	3	3	3	1	2	2	2	1	1	1	10	4	1	1	1	1	1	1	1	1	1	1	1	1	1	1	1	1	1	1	4	1	1	2	2	2	2
1593	2	2	7	4	1	1	5	Trader/Artisans/Business	7	1	3	2	3	4	5	2	2	2	98	1	3	1	10	4	1	.	1	1	1	1	1	1	1	1	1	1	1	1	1	1	1	1	5	2	1	2	2	2	2
1594	2	1	7	2	1	1	6	Teaching/Academic Rank	4	1	1	3	3	3	4	1	2	2	2	1	1	1	1	1	0	.	.	.	.	.	.	.	0	.	.	.	.	.	.	.	.	.	5	2	1	3	3	3	3
1599	2	3	8	1	1	1	5	Teaching/Academic Rank	2	1	1	3	4	5	5	2	2	2	98	1	1	1	1	1	0	1	1	1	1	1	1	1	1	1	1	1	1	1	1	1	1	1	4	1	1	2	2	2	2
1617	2	2	8	1	1	1	6	Administrative Rank	1	2	98	3	4	5	2	2	1	1	98	1	4	1	10	4	1	1	1	1	1	1	1	1	1	1	1	1	1	1	1	1	1	1	4	1	1	2	2	2	2
1619	2	5	6	1	2	1	1	Trader/Artisans/Business	5	2	98	3	5	5	5	2	2	1	98	2	4	1	10	4	0	.	1	1	1	1	1	1	1	1	1	1	1	1	1	1	1	1	5	1	3	2	2	2	2
1627	2	3	8	1	2	1	1	Trader/Artisans/Business	3	1	3	3	4	4	3	1	1	1	2	1	4	1	10	4	1	1	1	1	1	1	1	1	1	1	1	1	1	1	1	1	1	1	4	2	1	2	2	2	2
1632	2	3	3	1	5	1	4	Teaching/Academic Rank	2	1	1	3	4	4	5	1	1	1	2	1	4	1	10	4	1	1	1	1	1	1	1	1	1	1	1	1	1	1	1	1	1	1	4	2	1	1	1	1	1
1635	2	6	6	2	1	1	4	Clergy Rank	7	2	98	4	5	5	4	2	1	1	98	1	2	1	10	4	1	1	1	1	1	1	1	1	1	1	1	1	1	1	1	1	1	1	5	2	1	2	2	2	2
1646	2	3	8	2	2	1	2	Trader/Artisans/Business	6	2	98	4	5	5	3	2	2	2	98	1	4	1	10	4	1	1	1	1	1	1	1	1	1	1	1	1	1	1	1	1	1	1	5	2	2	2	2	2	2
1647	2	2	7	1	1	2	3	Teaching/Academic Rank	3	1	1	4	4	4	4	2	2	2	98	1	2	1	10	4	0	1	1	1	1	1	1	1	1	1	1	1	1	1	1	1	1	1	3	2	2	2	2	2	2
1652	2	3	3	2	2	1	3	Administrative Rank	1	1	1	2	3	3	3	1	1	1	2	1	4	1	10	4	1	1	1	1	1	1	1	1	1	1	1	1	1	1	1	1	1	1	4	2	3	1	1	1	1
1664	2	2	8	4	1	1	6	Administrative Rank	7	2	98	4	5	5	3	2	2	2	98	1	4	1	10	4	0	.	1	1	1	1	1	1	1	1	1	1	1	1	1	1	1	1	3	1	1	2	2	2	2
1665	2	3	7	4	1	1	1	Administrative Rank	3	2	98	3	3	3	3	1	2	2	2	1	3	1	10	4	1	1	1	1	1	1	1	1	1	1	1	1	1	1	1	1	1	1	5	1	1	2	2	2	2
1681	2	5	6	1	2	1	1	Administrative Rank	4	2	98	3	4	4	4	2	2	2	98	1	2	1	1	2	0	.	1	1	1	1	1	1	1	1	1	1	1	1	1	1	1	1	5	1	1	2	2	2	2
1684	2	2	7	1	1	1	5	Administrative Rank	7	1	1	3	4	4	2	2	2	1	98	1	1	1	1	2	1	.	1	1	1	1	1	1	1	1	1	1	1	1	1	1	1	1	5	1	2	2	2	2	2
1685	2	2	9	2	1	1	6	Trader/Artisans/Business	7	2	98	4	5	5	5	2	2	2	98	1	1	1	2	1	1	.	1	1	1	1	1	1	1	1	1	1	1	1	1	1	1	1	4	1	1	2	2	2	2
1691	2	2	7	1	1	1	5	Professional rank	7	2	98	4	4	5	1	2	2	2	98	1	1	1	1	1	1	1	.	.	.	.	.	.	0	.	.	.	.	.	.	.	.	.	1	2	1	2	2	2	2
1693	2	3	8	2	2	1	1	Administrative Rank	5	2	98	2	3	3	5	2	2	2	98	1	6	1	2	2	1	1	1	1	1	1	1	1	1	1	1	1	1	1	1	1	1	1	4	1	1	2	2	2	2
1695	2	4	7	1	1	1	1	Administrative Rank	2	1	1	3	4	4	5	2	2	2	98	1	3	1	10	4	0	.	1	1	1	1	1	1	1	1	1	1	1	1	1	1	1	1	4	1	1	2	2	2	2
1700	2	2	7	1	1	2	1	Teaching/Academic Rank	4	2	98	3	3	3	5	2	2	2	98	1	6	1	10	4	0	.	1	1	1	1	1	1	1	1	1	1	1	1	1	1	1	1	5	2	2	2	2	2	2
1703	2	3	8	2	1	1	2	Administrative Rank	5	2	98	3	3	3	5	2	2	2	98	1	4	1	10	4	0	1	1	1	1	1	1	1	1	1	1	1	1	1	1	1	1	1	3	2	2	2	2	2	2
1725	2	2	8	1	1	1	5	Professional rank	1	2	98	3	4	5	4	1	1	2	2	1	6	1	10	4	0	1	1	1	1	1	1	1	1	1	1	1	1	1	1	1	1	1	4	2	1	2	2	2	2
1731	2	3	9	3	2	2	2	Teaching/Academic Rank	7	1	1	3	4	5	4	1	2	2	2	1	6	1	10	4	1	1	1	1	1	1	1	1	1	1	1	1	1	1	1	1	1	1	1	2	2	2	2	2	2
1735	2	2	7	3	1	2	5	Professional rank	2	2	98	3	4	5	5	1	2	2	2	1	6	1	10	4	1	1	.	.	.	.	.	.	0	.	1	.	.	.	.	.	.	.	5	2	2	2	2	2	2
1737	2	3	6	1	2	1	4	Administrative Rank	6	1	3	3	4	5	4	1	1	1	3	1	1	1	10	4	1	1	1	1	1	1	1	1	1	1	1	1	1	1	1	1	1	1	4	1	1	2	2	2	2
1738	2	3	8	1	2	1	2	Administrative Rank	5	2	98	3	4	5	4	2	2	2	98	1	4	1	10	4	1	1	1	1	1	1	1	1	1	1	1	1	1	1	1	1	1	1	4	1	1	2	2	2	2
1742	2	1	7	1	1	1	1	Teaching/Academic Rank	1	2	98	4	4	4	4	2	2	2	98	1	5	1	9	1	0	.	.	.	.	.	.	.	0	.	1	.	.	.	.	.	.	.	5	2	2	2	2	2	2
1747	2	3	9	2	1	1	5	Trader/Artisans/Business	7	2	98	4	4	5	1	2	2	1	98	1	6	1	10	4	1	1	1	1	1	1	1	1	1	1	1	1	1	1	1	1	1	1	4	1	1	2	2	2	2
1748	2	2	6	1	1	1	1	Teaching/Academic Rank	2	2	98	3	3	3	3	2	2	2	98	1	3	1	4	1	1	1	1	1	1	1	1	1	1	1	1	1	1	1	1	1	1	1	3	1	1	2	2	2	2
1749	2	2	7	1	1	1	5	Trader/Artisans/Business	7	2	98	3	3	3	4	1	2	2	2	1	6	1	10	4	1	1	1	1	1	1	1	1	1	1	1	1	1	1	1	1	1	1	3	2	1	2	2	2	2
1750	2	3	7	2	1	1	1	Teaching/Academic Rank	4	2	98	3	3	3	4	2	2	2	98	1	2	1	4	1	0	.	1	1	1	1	1	1	1	1	1	1	1	1	1	1	1	1	5	1	1	2	2	2	2
1753	2	2	6	2	1	1	5	Trader/Artisans/Business	7	2	98	3	4	4	3	2	2	2	98	1	1	1	10	4	0	.	.	.	.	.	.	.	0	.	.	.	.	.	.	.	.	.	5	2	2	2	2	2	2
1758	2	2	6	2	1	1	5	Trader/Artisans/Business	2	2	98	3	3	4	4	1	2	2	2	1	4	1	10	4	1	1	.	.	.	.	.	.	0	.	.	.	.	.	.	.	.	.	5	2	2	2	2	2	2
1759	2	2	6	2	1	1	5	Teaching/Academic Rank	2	2	98	3	3	4	4	1	2	2	2	1	4	1	10	4	1	1	.	.	.	.	.	.	0	.	.	.	.	.	.	.	.	.	5	2	2	2	2	2	2
1762	2	2	7	2	1	1	5	Trader/Artisans/Business	7	2	98	3	4	4	4	1	2	1	2	1	3	1	10	4	0	.	.	.	.	.	.	.	0	.	1	.	.	.	.	.	.	.	5	3	3	3	3	3	3
1770	2	2	7	2	1	1	5	Teaching/Academic Rank	7	2	98	3	3	3	4	2	2	2	98	1	4	1	10	4	1	1	1	1	1	1	1	1	1	1	1	1	1	1	1	1	1	1	4	1	1	2	2	2	2
1771	2	4	8	2	2	2	4	Teaching/Academic Rank	7	2	98	4	4	4	4	2	2	2	98	1	4	1	10	4	1	1	1	1	1	1	1	1	1	1	1	1	1	1	1	1	1	1	3	1	1	2	2	2	2
1778	2	3	8	3	2	2	1	Teaching/Academic Rank	5	2	98	3	4	5	5	1	2	2	2	1	6	1	10	4	1	1	.	.	.	.	.	.	0	.	.	.	.	.	.	.	.	.	1	2	2	2	2	2	2
1783	2	5	8	1	2	1	1	Administrative Rank	7	2	98	4	4	4	2	2	2	2	98	1	4	1	10	4	1	1	1	1	1	1	1	1	1	1	1	1	1	1	1	1	1	1	5	1	1	2	2	2	2
0457	2	2	6	1	1	2	1	Administrative Rank	3	2	98	3	5	5	5	2	2	2	98	1	1	1	10	4	1	1	.	.	.	.	.	.	0	.	.	.	.	.	.	.	.	.	2	2	2	2	2	2	1
0459	2	4	10	1	2	1	2	Administrative Rank	7	1	1	3	5	5	5	2	1	1	98	1	4	1	8	3	1	1	1	1	1	1	1	1	1	1	1	1	1	1	1	1	1	1	4	1	1	2	2	2	2
0462	2	2	6	2	2	1	6	Administrative Rank	5	2	98	3	3	3	4	1	1	1	2	2	6	1	10	4	1	1	1	1	1	1	1	1	1	1	1	1	1	1	1	1	1	1	2	2	2	2	2	2	2
0464	2	3	8	2	1	1	4	Teaching/Academic Rank	6	1	1	3	5	4	5	2	2	2	98	1	1	1	8	3	1	1	.	1	1	1	1	1	1	1	.	.	.	.	.	.	.	.	2	1	1	3	3	3	3
0465	2	2	8	2	1	1	5	Teaching/Academic Rank	3	2	98	4	5	5	5	1	2	1	2	1	4	1	10	4	1	1	.	1	1	1	1	1	1	1	.	.	.	.	.	.	.	.	2	1	1	2	2	2	2
0470	2	3	7	2	2	1	2	Trader/Artisans/Business	6	2	98	4	5	5	5	2	2	2	98	1	2	1	1	3	1	.	1	1	1	1	1	1	1	1	1	1	1	1	1	1	1	1	1	1	1	2	2	2	2
0474	2	4	8	2	5	2	2	Administrative Rank	7	2	98	2	3	3	2	1	2	1	3	1	4	1	1	3	1	1	1	1	1	1	1	1	1	1	1	1	1	1	1	1	1	1	2	1	1	1	1	1	1
0476	2	2	6	2	1	1	4	Trader/Artisans/Business	1	2	98	3	3	4	4	2	2	2	98	1	2	1	10	4	0	1	1	1	1	1	1	1	1	1	1	1	1	1	1	1	1	1	4	1	1	2	2	2	2
0479	2	3	9	4	2	1	1	Trader/Artisans/Business	3	2	98	4	5	5	5	2	2	2	98	1	2	1	4	3	0	1	.	.	.	.	.	.	0	.	.	.	.	.	.	.	.	.	1	1	1	2	2	2	2
0490	2	2	6	1	1	4	3	Teaching/Academic Rank	2	2	98	3	4	4	5	2	2	1	98	1	4	1	3	3	1	1	1	1	1	1	1	1	1	1	1	1	1	1	1	1	1	1	1	1	1	2	2	2	2
0492	2	2	8	1	1	1	1	Professional rank	3	2	98	3	4	4	4	1	1	1	2	1	1	1	3	3	0	1	1	1	1	1	1	1	1	1	1	1	1	1	1	1	1	1	1	2	1	2	2	2	2
0493	2	3	9	1	1	1	3	Administrative Rank	1	1	1	3	3	3	98	1	2	1	2	1	2	1	2	3	1	1	1	1	1	1	1	1	1	1	1	1	1	1	1	1	1	1	5	2	2	2	2	2	2
0494	2	3	7	1	2	2	3	Trader/Artisans/Business	1	2	98	3	4	4	5	1	2	1	3	1	6	1	10	4	0	1	1	1	1	1	1	1	1	1	1	1	1	1	1	1	1	1	5	2	2	2	2	2	2
0498	2	2	8	2	1	1	5	Administrative Rank	2	2	98	3	4	3	5	2	2	2	98	1	1	1	4	2	0	1	1	1	1	1	1	1	1	1	1	1	1	1	1	1	1	1	2	2	2	2	2	2	2
0504	2	2	8	2	1	1	5	Professional rank	1	2	98	3	3	4	98	2	2	2	98	1	4	1	4	1	0	1	1	1	1	1	1	1	1	1	1	1	1	1	1	1	1	1	1	2	2	2	2	2	2
0507	2	4	8	1	2	1	2	Trader/Artisans/Business	7	2	98	3	5	5	3	2	2	2	98	1	3	1	4	3	1	1	1	1	1	1	1	1	1	1	1	1	1	1	1	1	1	1	4	2	2	2	2	2	2
0516	2	2	8	1	1	1	1	Professional rank	2	2	98	4	5	4	5	2	2	2	98	1	3	1	4	3	0	.	1	.	.	.	.	.	0	.	.	.	.	.	.	.	.	.	4	2	2	2	2	2	2
0519	2	2	3	2	1	1	3	Administrative Rank	2	1	1	4	5	5	98	1	1	1	2	2	6	1	4	2	0	.	1	1	1	1	1	1	1	1	1	1	1	1	1	1	1	1	4	2	2	2	2	2	2
0520	2	2	8	3	1	2	5	Administrative Rank	1	2	98	3	3	4	3	2	2	2	98	1	3	1	4	3	1	1	1	1	1	1	1	1	1	1	1	1	1	1	1	1	1	1	5	2	1	2	2	2	2
0521	2	4	7	1	2	1	4	Trader/Artisans/Business	1	1	1	3	4	4	5	1	1	1	2	1	3	1	4	2	0	.	1	1	1	1	1	1	1	1	1	1	1	1	1	1	1	1	4	2	2	2	2	2	2
0524	2	2	7	3	2	2	5	Trader/Artisans/Business	1	2	98	3	4	5	4	2	1	1	2	1	2	1	10	4	1	.	.	.	.	.	.	.	0	.	.	.	.	.	.	.	.	.	5	2	1	2	2	2	2
0528	2	2	8	1	1	1	3	Trader/Artisans/Business	5	1	1	4	3	3	5	2	2	2	98	1	3	1	10	4	1	.	1	1	1	1	1	1	1	1	1	1	1	1	1	1	1	1	5	1	2	2	2	2	2
0535	2	4	7	1	1	1	1	Administrative Rank	1	1	98	4	5	5	5	2	2	2	98	1	6	1	1	2	0	.	1	1	1	1	1	1	1	1	1	1	1	1	1	1	1	1	4	2	2	2	2	2	2
0536	2	3	8	2	1	1	4	Trader/Artisans/Business	6	1	1	3	5	4	5	2	2	2	98	1	1	1	1	3	1	1	.	.	.	.	.	.	0	.	.	.	.	.	.	.	.	.	1	3	3	3	3	3	3
0537	2	3	7	1	2	2	3	Trader/Artisans/Business	1	2	98	3	4	4	5	1	2	1	98	1	6	1	10	4	0	1	1	1	1	1	1	1	1	1	1	1	1	1	1	1	1	1	5	2	2	2	2	2	2
0544	2	3	5	2	2	4	3	Trader/Artisans/Business	1	1	98	1	2	4	98	1	1	1	2	1	6	1	1	2	0	.	1	1	1	1	1	1	1	1	1	1	1	1	1	1	1	1	5	2	2	2	2	2	2
0546	2	3	8	1	1	2	3	Professional rank	1	2	98	3	4	4	4	2	2	2	98	1	3	1	1	2	0	1	1	1	1	1	1	1	1	1	1	1	1	1	1	1	1	1	5	2	2	2	2	2	2
0549	2	3	7	1	1	1	1	Administrative Rank	2	2	98	4	5	5	5	2	2	2	98	1	1	1	10	4	0	.	1	1	1	1	1	1	1	1	1	1	1	1	1	1	1	1	4	2	2	2	2	2	2
0550	2	4	8	1	2	1	1	Administrative Rank	4	2	98	3	3	4	3	2	1	1	2	1	4	1	10	4	1	1	1	1	1	1	1	1	1	1	1	1	1	1	1	1	1	1	4	2	2	2	2	2	2
0553	2	3	7	1	2	2	1	Administrative Rank	2	2	98	4	4	4	4	2	2	2	98	1	4	1	4	2	0	.	1	1	1	1	1	1	1	1	1	1	1	1	1	1	1	1	4	2	2	2	2	2	2
0557	2	3	7	1	2	1	1	Administrative Rank	5	2	98	4	5	5	5	1	1	1	2	1	1	1	4	2	1	.	1	1	1	1	1	1	1	1	1	1	1	1	1	1	1	1	1	2	2	2	2	2	2
0559	2	3	6	1	1	1	3	Administrative Rank	1	1	98	3	5	4	98	1	1	1	2	1	1	1	1	1	1	.	1	1	1	1	1	1	1	1	1	1	1	1	1	1	1	1	1	2	2	2	2	2	2
0560	2	1	6	2	1	1	3	Administrative Rank	1	2	98	4	4	4	3	2	2	2	98	1	1	1	4	2	1	.	1	1	1	1	1	1	1	1	1	1	1	1	1	1	1	1	4	2	2	2	2	2	2
0561	2	4	8	1	1	1	1	Administrative Rank	1	2	98	3	4	4	98	1	1	1	2	1	1	1	10	4	1	.	1	1	1	1	1	1	1	1	1	1	1	1	1	1	1	1	4	2	2	2	2	2	2
0563	2	2	8	2	2	1	1	Administrative Rank	3	2	98	4	5	5	5	2	1	1	2	2	6	1	4	2	0	.	1	1	1	1	1	1	1	1	1	1	1	1	1	1	1	1	4	2	2	3	3	3	3
0564	2	2	6	1	1	2	5	Administrative Rank	1	1	98	4	3	4	1	1	2	2	98	1	3	1	8	2	0	.	.	.	.	.	.	.	0	.	.	.	.	.	.	.	.	.	4	1	2	2	2	2	2
0568	2	2	8	2	1	1	1	Teaching/Academic Rank	4	2	98	4	3	3	98	2	2	2	98	1	4	1	1	1	0	.	1	1	1	1	1	1	1	1	1	1	1	1	1	1	1	1	5	3	3	3	3	3	3
0569	2	2	7	3	2	1	1	Trader/Artisans/Business	5	1	98	2	3	3	2	1	2	1	98	2	6	1	8	2	0	1	1	1	1	1	1	1	1	1	1	1	1	1	1	1	1	1	5	1	1	2	2	2	1
0573	2	4	7	1	3	2	1	Administrative Rank	5	2	98	3	4	3	5	2	2	2	98	1	1	1	8	1	0	.	1	1	1	1	1	1	1	1	1	1	1	1	1	1	1	1	4	2	2	2	2	2	1
0575	2	2	7	2	1	1	5	Administrative Rank	1	2	98	4	4	3	5	2	2	2	98	1	2	1	5	2	1	.	.	.	.	.	.	.	0	.	.	.	.	.	.	.	.	.	5	3	2	2	2	2	2
0576	2	2	8	2	1	1	5	Administrative Rank	2	2	98	3	4	3	5	2	2	2	98	1	1	1	5	2	0	1	1	1	1	1	1	1	1	1	1	1	1	1	1	1	1	1	2	2	2	2	2	2	3
0582	2	2	9	1	2	2	3	Trader/Artisans/Business	3	1	98	3	4	4	4	2	2	2	98	1	2	1	10	4	1	1	1	1	1	1	1	1	1	1	1	1	1	1	1	1	1	1	5	1	1	3	3	3	3
0584	2	3	7	1	1	1	1	Trader/Artisans/Business	3	2	98	3	3	4	5	2	2	2	98	1	1	1	10	4	0	.	.	.	.	.	.	.	0	.	.	.	.	.	.	.	.	.	5	2	2	2	2	2	2
0591	2	3	6	2	1	1	4	Administrative Rank	4	2	98	3	2	4	3	1	2	2	2	1	3	1	10	4	0	.	.	.	.	.	.	.	0	.	.	.	.	.	.	.	.	.	5	1	1	2	2	2	2
0594	2	5	5	2	2	1	4	Administrative Rank	4	1	1	4	5	5	3	1	1	1	2	1	2	1	10	4	0	.	.	.	.	.	.	.	0	.	.	.	.	.	.	.	.	.	4	2	1	2	2	2	2
0596	2	2	8	1	2	4	1	Trader/Artisans/Business	3	2	98	3	3	4	3	1	1	1	2	1	2	1	10	4	1	1	1	1	1	1	1	1	1	1	1	1	1	1	1	1	1	1	5	2	1	2	2	2	2
0606	2	3	8	1	2	1	2	Trader/Artisans/Business	6	1	1	4	5	5	4	1	1	1	2	1	3	1	2	1	1	.	1	1	1	1	1	1	1	1	1	1	1	1	1	1	1	1	3	2	2	2	2	2	2
0618	2	2	8	2	1	1	5	Administrative Rank	2	2	98	3	4	3	5	2	2	2	98	1	1	1	1	2	1	1	1	1	1	1	1	1	1	1	1	1	1	1	1	1	1	1	2	2	2	2	2	2	2
0620	2	3	8	2	2	1	1	Administrative Rank	4	1	98	3	5	5	5	2	2	2	98	1	3	1	1	1	1	.	1	1	1	1	1	1	1	1	1	1	1	1	1	1	1	1	4	1	1	2	2	2	2
0621	2	2	6	1	1	1	5	Administrative Rank	1	1	98	4	3	3	1	1	1	1	2	1	1	1	1	2	0	.	.	.	.	.	.	.	0	.	.	.	.	.	.	.	1	1	4	1	2	2	2	2	2
0624	2	3	8	2	1	1	5	Administrative Rank	3	1	1	4	4	4	4	1	2	2	2	1	3	1	10	4	0	1	1	1	1	1	1	1	1	1	1	1	1	1	1	1	1	1	3	2	2	2	2	2	2
0625	2	2	6	2	1	1	5	Administrative Rank	1	2	98	4	4	3	5	2	2	2	98	1	2	1	10	4	0	.	.	.	.	.	.	.	0	.	.	.	.	.	.	.	1	1	3	2	2	2	2	2	2
0626	2	4	9	1	1	2	2	Administrative Rank	1	1	1	4	5	5	5	2	2	2	98	1	4	1	10	4	1	1	1	1	1	1	1	1	1	1	1	1	1	1	1	1	1	1	3	2	2	2	2	2	2
0636	2	2	8	1	1	1	2	Trader/Artisans/Business	7	1	1	4	4	4	5	1	1	1	2	1	6	1	10	4	0	1	.	.	.	.	.	.	0	.	.	.	.	.	.	.	.	.	3	2	2	2	2	2	2
0640	2	2	6	2	1	1	5	Professional rank	1	1	98	4	5	5	4	2	2	2	98	1	3	1	10	4	0	.	.	.	.	.	.	.	0	.	.	.	.	.	.	.	1	1	3	1	3	2	2	2	2
0649	2	3	8	1	2	1	2	Administrative Rank	7	2	98	4	5	5	5	2	2	2	98	1	3	1	10	4	0	1	1	1	1	1	1	1	1	1	1	1	1	1	1	1	1	1	3	2	1	2	2	2	2
0650	2	2	6	1	2	1	4	Professional rank	5	2	98	3	4	3	5	2	2	2	98	1	1	1	2	2	0	1	1	1	1	1	1	1	1	1	1	1	1	1	1	1	1	1	1	2	2	2	2	2	2
0653	2	3	7	2	2	4	4	Administrative Rank	5	2	98	4	3	3	5	2	2	2	98	1	1	1	10	4	0	1	1	1	1	1	1	1	1	1	1	1	1	1	1	1	1	1	4	2	2	2	2	2	2
0654	2	2	6	1	1	1	5	Administrative Rank	1	2	98	3	4	4	98	1	1	1	2	1	1	1	4	2	0	1	.	.	.	.	.	.	0	.	.	.	.	.	.	1	1	1	3	1	3	3	3	3	3
0655	2	1	5	1	2	2	5	Trader/Artisans/Business	1	1	98	3	4	4	4	2	2	2	98	1	1	1	10	4	1	1	1	1	1	1	1	1	1	1	1	1	1	1	1	1	1	1	3	1	1	2	2	2	2
0663	2	2	8	1	1	1	3	Teaching/Academic Rank	1	1	1	4	4	3	5	2	2	1	98	1	6	1	10	4	1	1	1	1	1	1	1	1	1	1	1	1	1	1	1	1	1	1	3	2	2	2	2	2	2
0666	2	3	8	1	2	1	1	Administrative Rank	5	2	98	4	3	3	4	2	2	1	98	1	3	1	10	4	0	.	1	1	1	1	1	1	1	1	1	1	1	1	1	1	1	1	4	2	3	2	2	2	2
0668	2	4	9	2	2	4	2	Administrative Rank	7	2	98	4	3	3	5	2	2	2	98	1	4	1	10	4	1	.	1	1	1	1	1	1	1	1	1	1	1	1	1	1	1	1	3	2	2	2	2	2	2
0673	2	3	8	2	1	1	5	Administrative Rank	1	2	98	4	4	5	5	1	1	1	2	1	4	1	10	4	1	1	1	1	1	1	1	1	1	1	1	1	1	1	1	1	1	1	3	1	1	2	2	2	2
0674	2	4	6	4	2	4	3	Administrative Rank	1	1	98	1	1	2	4	1	2	2	2	1	3	1	10	4	0	.	1	1	1	1	1	1	1	1	1	1	1	1	1	1	1	1	3	2	2	2	2	2	2
0698	2	3	7	1	1	2	2	Administrative Rank	4	2	98	3	3	4	5	1	1	1	2	1	4	1	10	4	0	1	1	1	1	1	1	1	1	1	1	1	1	1	1	1	1	1	4	1	3	3	3	3	3
0699	2	3	8	2	1	1	2	Administrative Rank	6	2	98	4	3	3	5	1	2	1	3	1	4	1	2	3	1	1	1	1	1	1	1	1	1	1	1	1	1	1	1	1	1	1	4	1	3	2	2	2	2
0700	2	3	8	1	2	1	1	Administrative Rank	3	2	98	3	4	4	5	1	2	1	2	1	3	1	10	4	0	.	.	.	.	.	.	.	0	.	.	.	.	.	.	.	.	.	3	2	2	2	2	2	2
0702	2	5	9	1	2	4	4	Administrative Rank	7	1	98	4	5	5	5	2	2	2	98	1	1	1	10	4	0	.	.	.	.	.	.	.	0	.	.	.	.	.	.	.	.	.	3	1	3	2	2	2	2
0705	2	3	8	1	2	2	3	Administrative Rank	1	1	98	4	3	4	98	1	1	1	1	1	4	1	10	4	0	1	.	.	.	.	.	.	0	.	.	.	.	.	.	.	.	.	3	2	2	2	2	2	2
0709	2	5	9	1	5	1	1	Administrative Rank	7	2	98	4	4	5	98	1	1	1	2	1	1	1	2	2	0	1	.	.	.	.	.	.	0	.	.	.	.	.	.	.	.	.	3	2	2	2	2	2	2
0721	2	3	8	2	2	1	1	Professional rank	4	1	1	4	3	3	4	2	2	1	98	1	3	1	4	2	1	1	1	1	1	1	1	1	1	1	1	1	1	1	1	1	1	1	4	1	2	2	2	2	2
0722	2	4	8	2	2	1	2	Administrative Rank	7	1	1	4	4	4	5	1	1	1	2	1	3	1	4	2	1	1	.	.	.	.	.	.	0	.	.	.	.	.	.	.	.	.	3	1	2	2	2	2	2
0731	2	3	9	1	1	1	2	Administrative Rank	2	2	98	4	4	4	5	2	2	2	98	1	3	1	10	4	1	1	1	1	1	1	1	1	1	1	1	1	1	1	1	1	1	1	2	1	1	2	2	2	2
0732	2	3	8	2	2	1	4	Administrative Rank	1	2	98	4	4	4	5	1	1	1	1	1	2	1	10	4	1	1	.	.	.	.	.	.	0	.	.	.	.	.	.	.	.	.	3	1	2	2	2	2	2
0733	2	2	6	1	1	1	5	Administrative Rank	1	1	98	3	3	3	5	1	2	1	1	1	1	1	1	1	1	1	1	1	1	1	1	1	1	1	1	1	1	1	1	1	1	1	5	2	2	2	2	2	2
0736	2	2	5	1	1	1	3	Administrative Rank	1	2	98	3	4	4	4	2	2	2	98	1	6	1	10	4	1	1	1	1	1	1	1	1	1	1	1	1	1	1	1	1	1	1	2	1	1	2	2	2	2
0741	2	2	5	1	1	1	5	Trader/Artisans/Business	1	1	98	3	4	4	4	2	2	2	98	1	2	1	4	2	0	.	.	.	.	.	.	.	0	.	.	.	.	.	.	.	.	.	3	1	1	1	1	1	1
0743	2	3	8	2	2	2	3	Trader/Artisans/Business	1	1	98	3	4	5	5	1	1	1	2	1	1	1	10	4	1	1	.	.	.	.	.	.	0	.	.	.	.	.	.	.	.	.	3	1	3	2	2	2	2
0746	2	4	8	1	2	1	3	Professional rank	1	1	98	4	4	4	4	1	1	1	2	1	3	1	10	4	1	1	.	.	.	.	.	.	0	.	1	.	.	.	.	.	.	.	4	2	3	3	3	3	3
0748	2	3	9	1	1	1	3	Administrative Rank	1	1	98	3	3	3	4	1	1	1	3	1	6	1	10	4	1	1	.	.	.	.	.	.	0	.	1	.	.	.	1	.	.	.	4	3	3	2	2	2	2
0751	2	3	8	1	2	2	1	Administrative Rank	7	1	98	4	5	5	5	2	2	2	98	1	3	1	9	1	0	1	.	.	.	.	1	1	1	.	.	.	.	1	1	.	.	.	4	1	1	2	2	2	2
0753	2	3	8	1	1	1	1	Administrative Rank	4	2	98	4	5	4	5	2	2	2	98	1	3	1	9	2	0	1	.	.	.	.	.	.	0	.	.	.	.	.	.	.	.	.	4	1	1	2	2	2	2
0755	2	3	7	4	1	1	4	Professional rank	3	2	98	3	4	3	4	2	2	1	98	1	3	1	10	4	0	1	1	1	1	1	1	1	1	1	1	1	1	1	1	1	1	1	4	2	1	2	2	2	2
0756	2	3	8	1	2	1	6	Professional rank	1	1	98	4	5	5	5	1	1	1	2	1	6	1	10	4	1	1	.	.	.	.	.	.	0	.	.	.	.	.	.	.	.	.	4	3	3	2	2	2	2
0758	2	4	8	1	2	1	1	Professional rank	7	1	1	3	3	3	4	1	1	1	3	1	6	1	10	4	0	.	.	.	.	.	.	.	0	.	.	.	.	.	.	.	.	.	5	3	3	2	2	2	2
0760	2	4	8	2	2	1	1	Administrative Rank	6	2	98	3	3	3	4	1	1	1	3	1	3	1	10	4	0	.	.	.	.	.	.	.	0	.	.	.	.	.	.	.	.	.	4	3	3	2	2	2	2
0762	2	5	8	4	2	2	4	Trader/Artisans/Business	7	2	98	3	3	3	4	1	1	1	1	1	4	1	10	4	1	1	.	.	.	.	.	.	0	.	.	.	.	.	.	.	.	.	4	1	3	2	2	2	2
0763	2	3	7	1	1	1	3	Trader/Artisans/Business	1	1	98	3	3	3	5	1	1	1	2	1	1	1	10	4	0	.	.	.	.	.	.	.	0	.	.	.	.	.	.	.	.	.	4	3	3	2	2	2	2
0768	2	3	7	1	2	1	6	Professional rank	1	1	98	4	5	5	4	2	2	2	98	1	6	1	10	4	1	1	1	1	1	1	1	1	1	1	1	1	1	1	1	1	1	1	4	1	1	2	2	2	2
0773	2	3	8	1	1	1	1	Trader/Artisans/Business	2	2	98	3	4	4	4	1	1	1	3	1	3	1	10	4	0	1	.	.	.	.	.	.	0	.	.	.	.	.	.	.	.	.	4	1	2	2	2	2	2
0775	2	3	7	3	2	2	4	Trader/Artisans/Business	4	1	98	4	5	5	5	2	2	2	98	1	3	1	10	4	1	1	1	1	1	1	1	1	1	1	1	1	1	1	1	1	1	1	4	2	2	2	2	2	2
0776	2	2	8	2	3	2	6	Trader/Artisans/Business	6	1	1	4	4	4	98	1	1	1	3	1	4	1	10	4	1	1	1	1	1	1	1	1	1	1	1	1	1	1	1	1	1	1	4	1	2	2	2	2	2
0779	2	3	8	2	1	1	5	Trader/Artisans/Business	1	2	98	3	3	3	5	1	1	1	2	1	4	1	10	4	1	1	.	.	.	.	.	.	0	.	.	.	.	.	.	.	.	.	4	1	3	2	2	2	2
0780	2	4	8	1	2	2	1	Teaching/Academic Rank	5	1	1	4	4	4	5	1	1	1	2	1	3	1	5	2	1	1	.	.	.	.	.	.	0	.	.	.	.	.	.	.	.	.	4	1	3	2	2	2	2
0784	2	3	8	2	2	3	4	Teaching/Academic Rank	5	2	98	4	4	4	5	1	1	1	2	1	3	1	5	2	1	1	.	.	.	.	.	.	0	.	.	.	.	.	.	.	.	.	4	2	2	2	2	2	2
0785	2	2	8	1	1	1	5	Trader/Artisans/Business	3	2	98	4	3	3	98	1	1	1	3	1	4	1	10	4	1	1	.	.	.	.	.	.	0	.	.	.	.	.	.	.	.	.	4	3	3	2	2	2	2
0787	2	2	8	2	2	1	3	Trader/Artisans/Business	2	1	98	4	4	3	5	1	1	1	3	1	6	1	5	2	1	1	1	1	1	1	1	1	1	1	1	1	1	1	1	1	1	1	4	3	3	3	3	3	3
0795	2	3	10	2	2	3	2	Teaching/Academic Rank	6	2	98	4	5	5	5	1	1	1	3	1	4	1	10	4	1	1	1	1	1	1	1	1	1	1	1	1	1	1	1	1	1	1	4	2	2	2	2	2	2
0797	2	2	8	4	2	3	2	Professional rank	6	1	2	4	3	3	5	1	1	1	1	1	1	1	10	4	1	1	.	.	.	.	.	.	0	.	.	.	.	.	.	.	.	.	4	3	3	3	3	3	3
0798	2	4	9	4	2	1	1	Professional rank	7	2	98	3	3	4	98	1	1	1	1	1	4	1	10	4	1	1	1	1	1	1	1	1	1	1	1	1	1	1	1	1	1	1	4	1	3	2	2	2	2
0806	2	2	7	2	2	1	6	Administrative Rank	2	2	98	4	5	5	5	1	1	1	2	1	1	1	10	4	1	1	.	.	.	.	.	.	0	.	.	.	.	.	.	.	.	.	4	3	3	2	2	2	2
0812	2	3	7	1	1	2	1	Professional rank	6	1	1	3	3	3	5	1	2	2	2	1	2	1	7	2	1	.	.	.	.	.	.	.	0	.	.	1	1	.	.	.	.	.	1	2	2	2	2	2	2
0813	2	2	8	1	2	1	1	Administrative Rank	7	2	98	3	3	3	5	1	1	1	2	1	4	1	10	4	1	1	.	.	.	.	.	.	0	.	.	1	1	.	.	.	.	.	4	3	3	2	2	2	2
0817	2	3	7	3	2	2	1	Clergy Rank	7	1	1	4	5	5	5	2	2	2	98	1	3	1	10	4	1	.	.	.	.	.	.	.	0	.	.	.	.	.	.	.	.	.	4	1	1	2	2	2	2
0826	2	2	8	1	1	1	3	Professional rank	2	2	98	4	4	5	5	1	1	1	2	1	1	1	6	3	0	1	1	1	1	1	1	1	1	1	1	1	1	1	1	1	1	1	4	2	2	2	2	2	2
0830	2	2	6	1	2	1	3	Administrative Rank	2	1	98	3	4	3	3	2	1	1	98	1	2	1	10	4	1	.	.	.	.	.	.	.	0	.	.	.	.	.	.	.	.	.	4	1	3	2	2	2	1
0835	2	4	8	4	2	1	1	Clergy Rank	7	2	98	4	5	5	4	2	2	2	98	1	1	1	10	4	1	1	1	1	1	1	1	1	1	1	1	1	1	1	1	1	1	1	4	2	2	2	2	2	1
0837	2	2	6	1	1	2	5	Teaching/Academic Rank	2	1	3	2	2	3	2	1	1	2	2	1	6	1	10	4	1	.	1	1	1	1	1	1	1	1	1	1	1	1	1	1	1	1	4	1	1	2	2	2	1
0838	2	3	9	1	1	1	6	Trader/Artisans/Business	7	2	98	4	5	5	5	1	1	1	2	1	2	1	10	4	0	.	.	.	.	.	.	.	0	.	.	.	.	.	.	.	.	.	4	2	1	2	2	2	1
0840	2	1	6	4	1	1	5	Professional rank	1	1	1	4	5	5	1	1	2	1	2	1	1	1	10	4	1	1	1	1	1	1	1	1	1	1	1	1	1	1	1	1	1	1	4	2	1	2	2	2	2
0841	2	1	6	1	1	2	5	Professional rank	2	2	98	4	5	4	98	2	2	2	98	1	1	1	7	2	1	1	1	1	1	1	1	1	1	1	1	1	1	1	1	1	1	1	4	2	1	2	2	2	1
0842	2	1	6	1	1	1	5	Administrative Rank	2	1	98	3	5	4	98	2	2	2	98	1	1	1	10	4	1	1	1	1	1	1	1	1	1	1	1	1	1	1	1	1	1	1	4	2	1	2	2	2	1
0845	2	3	6	1	1	1	6	Administrative Rank	2	2	98	4	5	4	98	2	2	2	98	1	1	1	7	2	1	1	.	.	.	.	.	.	0	.	.	.	.	.	.	.	.	.	4	1	3	2	2	2	1
0847	2	3	7	1	2	1	6	Administrative Rank	1	1	98	4	5	5	5	2	2	2	98	1	6	1	10	4	1	1	.	.	.	.	.	.	0	.	.	.	.	.	.	.	.	.	4	2	2	2	2	2	2
0848	2	3	8	1	1	1	1	Administrative Rank	2	2	98	4	5	5	98	1	2	1	2	1	1	1	1	1	0	1	1	1	1	1	1	1	1	1	1	1	1	1	1	1	1	1	4	2	1	2	2	2	2
0850	2	3	6	2	2	1	4	Administrative Rank	5	1	1	2	3	3	4	1	2	1	2	1	6	1	3	2	0	.	.	.	.	.	.	.	0	.	.	.	.	.	.	.	.	.	4	1	1	2	2	2	1
0856	2	3	9	1	1	1	4	Administrative Rank	7	1	1	4	4	5	4	2	2	2	98	1	2	1	10	4	1	1	1	1	1	1	1	1	1	1	1	1	1	1	1	1	1	1	5	1	1	2	2	2	1
0864	2	2	6	4	1	1	4	Teaching/Academic Rank	2	1	98	3	4	3	5	1	2	1	1	1	2	1	1	1	0	1	1	1	1	1	1	1	1	1	1	1	1	1	1	1	1	1	1	2	1	2	2	2	2
0867	2	4	6	4	2	1	4	Administrative Rank	5	1	3	3	4	3	4	2	2	2	98	1	1	1	4	2	0	.	.	.	.	.	.	.	0	.	.	.	.	.	.	.	.	.	4	3	3	3	3	3	3
0868	2	3	8	2	2	1	4	Administrative Rank	6	2	98	3	3	3	4	2	2	2	98	1	2	1	4	3	0	1	1	1	1	1	1	1	1	1	1	1	1	1	1	1	1	1	5	1	1	2	2	2	2
0869	2	3	8	1	2	1	4	Administrative Rank	2	1	98	4	5	3	98	2	2	2	98	1	1	1	7	2	0	.	.	.	.	.	.	.	0	.	.	.	.	.	.	.	.	.	4	3	3	3	3	3	3
0870	2	3	8	2	1	1	4	Administrative Rank	6	2	98	4	5	3	2	2	2	1	98	1	4	1	4	2	0	.	.	.	.	.	.	.	0	.	.	.	.	.	.	.	.	.	4	3	3	3	3	3	3
0871	2	2	9	1	2	1	1	Administrative Rank	7	2	98	4	5	5	1	2	2	1	98	1	6	1	4	3	0	1	1	1	1	1	1	1	1	1	1	1	1	1	1	1	1	1	5	2	2	2	2	2	2
0872	2	3	7	1	2	1	4	Administrative Rank	2	1	3	4	5	5	4	2	2	2	98	1	1	1	7	2	0	.	.	.	.	.	.	.	0	.	.	.	.	.	.	.	.	.	4	3	3	3	3	3	3
0877	2	3	9	1	2	1	4	Teaching/Academic Rank	1	2	98	3	3	3	98	2	2	2	98	1	4	1	1	1	0	.	1	1	1	1	1	1	1	1	1	1	1	1	1	1	1	1	4	2	2	2	2	2	1
0878	2	3	9	1	1	1	1	Trader/Artisans/Business	6	1	1	3	4	3	4	1	2	2	2	1	1	1	4	2	0	.	.	.	.	.	.	.	0	.	.	.	.	.	.	.	.	.	4	3	3	2	2	2	1
0879	2	2	8	1	2	2	4	Teaching/Academic Rank	2	1	98	3	4	4	5	1	2	1	1	1	6	1	10	4	1	1	1	1	1	1	1	1	1	1	1	1	1	1	1	1	1	1	4	3	3	2	2	2	2
0881	2	3	9	4	1	1	1	Professional rank	7	2	98	3	3	3	4	1	2	1	2	1	2	1	4	3	1	1	1	1	1	1	1	1	1	1	1	1	1	1	1	1	1	1	4	3	3	2	2	2	1
0886	2	3	5	2	1	1	1	Administrative Rank	5	2	98	4	5	5	5	2	2	2	98	1	1	1	1	3	0	1	1	1	1	1	1	1	1	1	1	1	1	1	1	1	1	1	4	1	1	2	2	2	1
0887	2	3	6	1	2	1	4	Administrative Rank	3	2	98	3	4	4	1	2	2	1	98	1	3	1	7	2	0	.	1	1	1	1	1	1	1	1	1	1	1	1	1	1	1	1	4	1	1	2	2	2	1
0890	2	3	8	2	1	2	1	Trader/Artisans/Business	7	2	98	3	5	5	5	2	2	2	98	1	3	1	7	2	1	1	1	1	1	1	1	1	1	1	1	1	1	1	1	1	1	1	4	1	1	1	1	1	1
0893	2	2	6	3	1	2	5	Administrative Rank	2	1	98	4	5	5	5	2	2	2	98	1	6	1	1	1	1	.	.	.	.	.	.	.	0	.	.	.	.	.	.	.	.	.	4	1	1	2	2	2	1
0898	2	3	8	4	1	1	5	Professional rank	2	1	1	4	5	3	5	2	2	2	98	1	3	1	4	3	1	.	1	1	1	1	1	1	1	1	1	1	1	1	1	1	1	1	1	2	2	2	2	2	1
0899	2	2	8	4	1	1	5	Professional rank	2	1	98	4	5	5	5	1	2	1	2	1	1	1	4	3	1	1	1	1	1	1	1	1	1	1	1	1	1	1	1	1	1	1	1	2	1	2	2	2	1
[truncated: 200 more columns]
